# Supplementary material for: Synergistic anti-tumor activity and inhibition of angiogenesis by cotargeting of oncogenic and death receptor pathways in human melanoma
Source: PubMed Central journal article supplement (PMC4649516; doi:10.1038/cddis.2014.410), 2014-10-02
Supplement: cddis2014410x3.pdf [file cddis2014410x3.pdf]

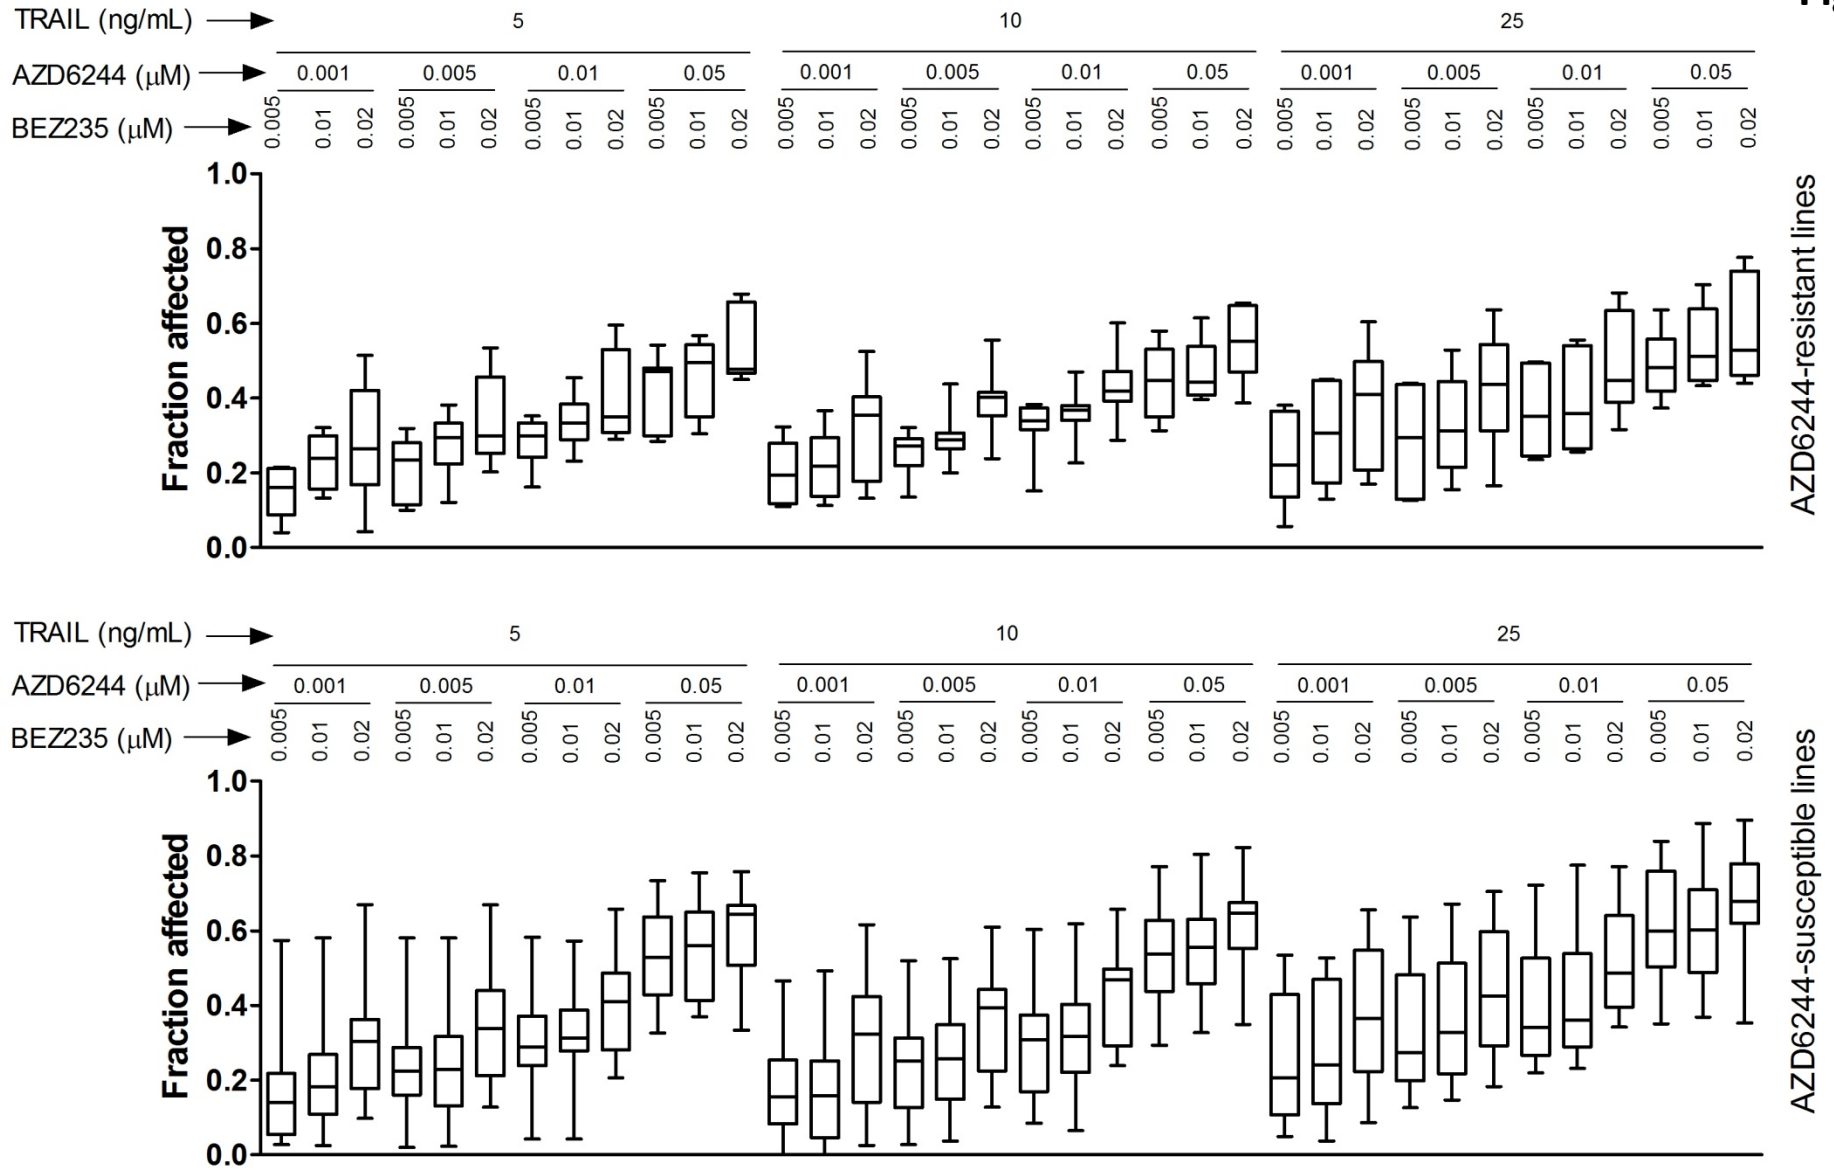

**Figure S5.** Box and whiskers plots of FA (Fraction affected) values by combinatorial treatment of AZD6244-resistant (n=7, upper graph) and AZD6244-susceptible (n=14, lower graph) melanoma cell lines with the association of AZD6244, BEZ235 and TRAIL.

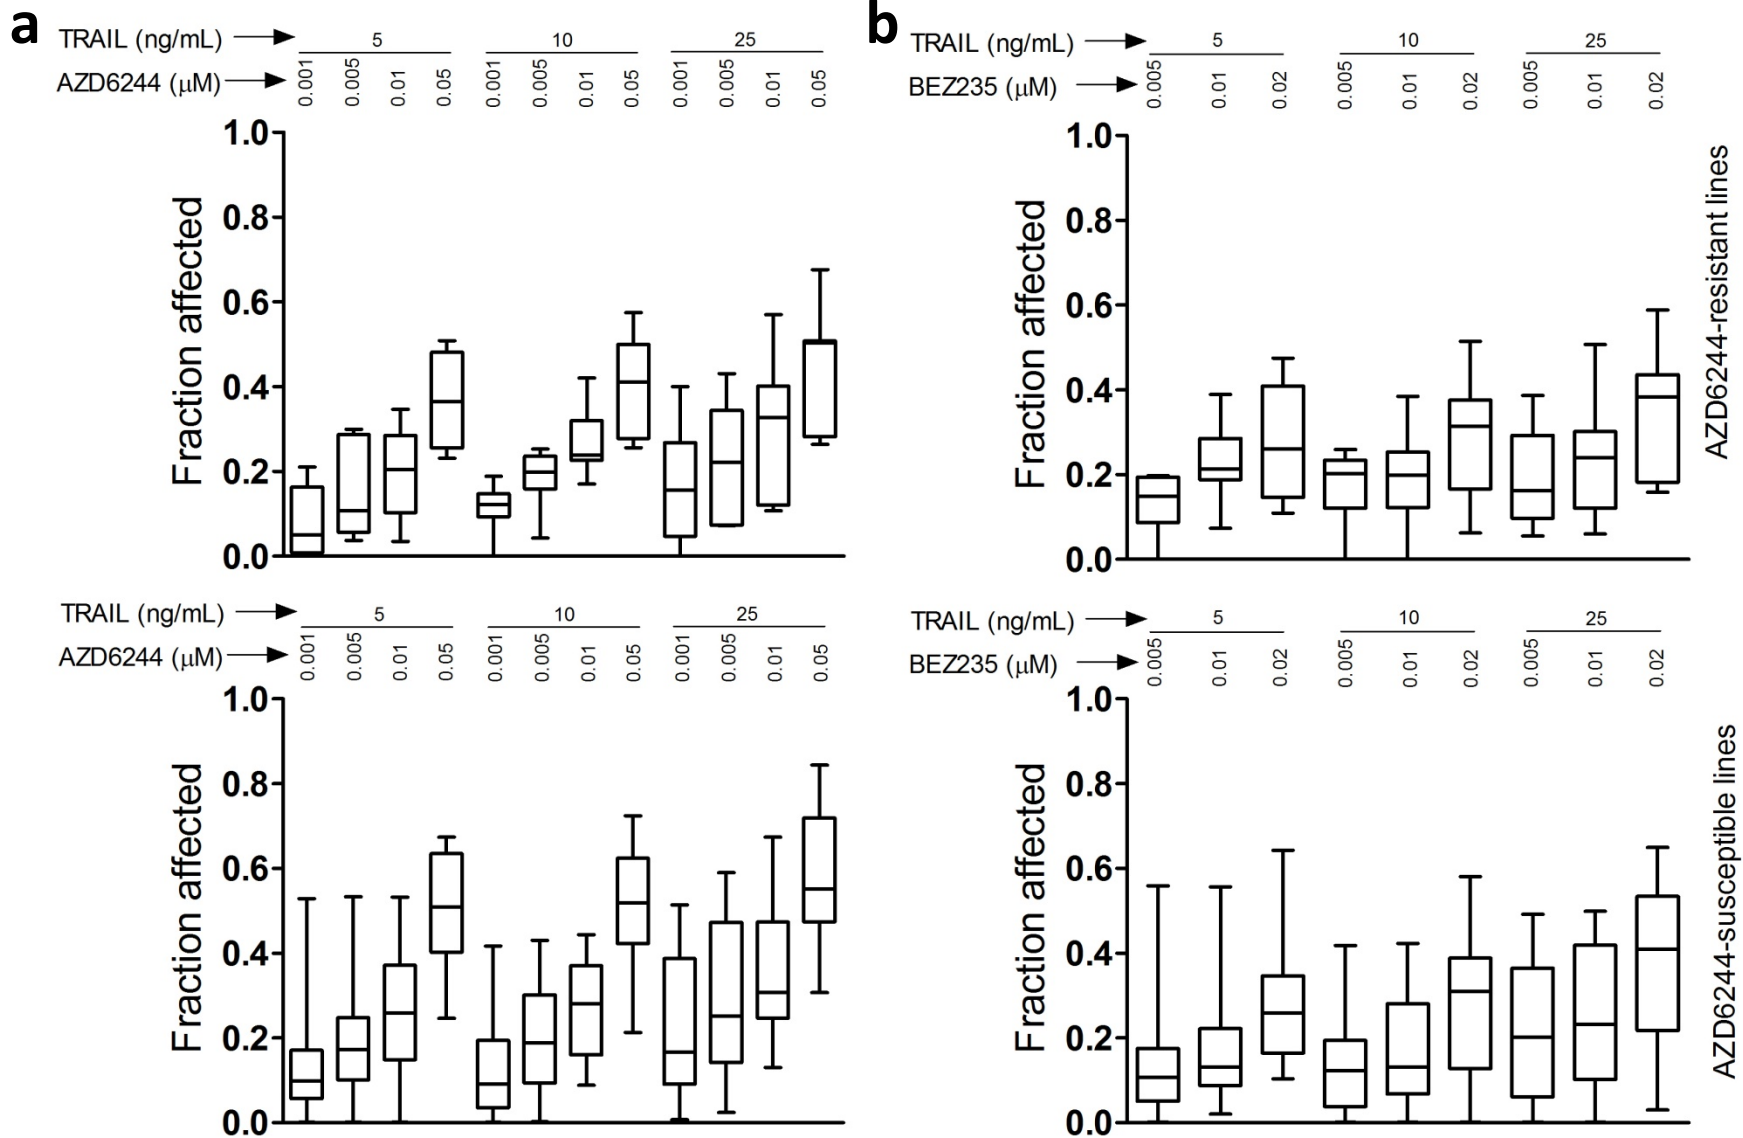

**Figure S6.** Box and whiskers plots of FA (Fraction affected) values by combinatorial treatment of AZD6244-resistant (n=7, upper graphs) and AZD6244-susceptible (n=14, lower graphs) melanoma cell lines with the association of AZD6244 and TRAIL (a) or of BEZ235 and TRAIL (b).
