# Supplementary material for: Synergistic anti-tumor activity and inhibition of angiogenesis by cotargeting of oncogenic and death receptor pathways in human melanoma
Source: PubMed Central journal article supplement (PMC4649516; doi:10.1038/cddis.2014.410), 2014-10-02
Supplement: cddis2014410x4.pdf [file cddis2014410x4.pdf]

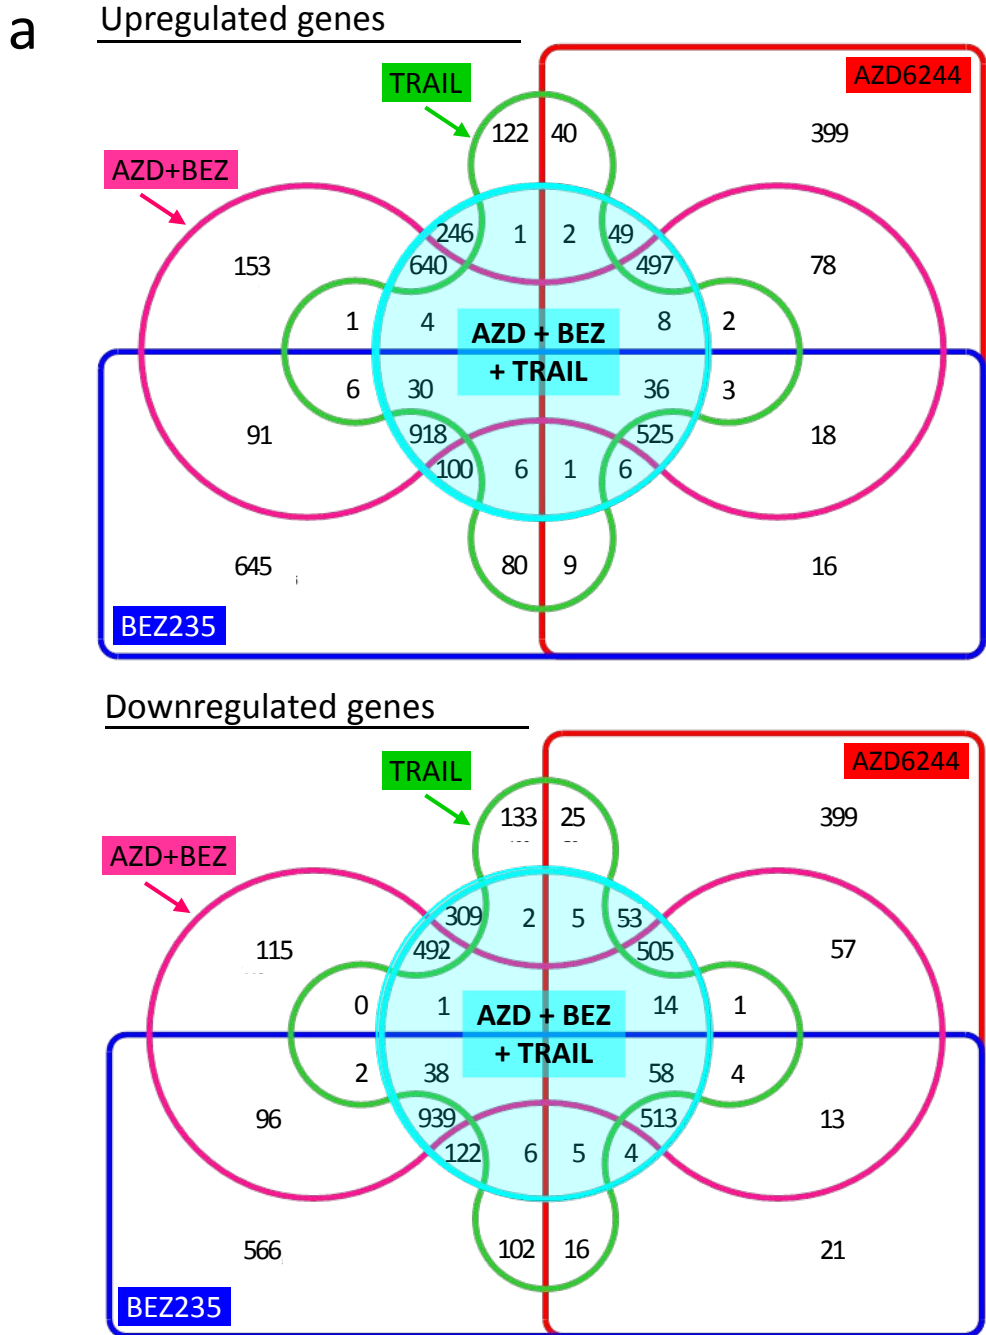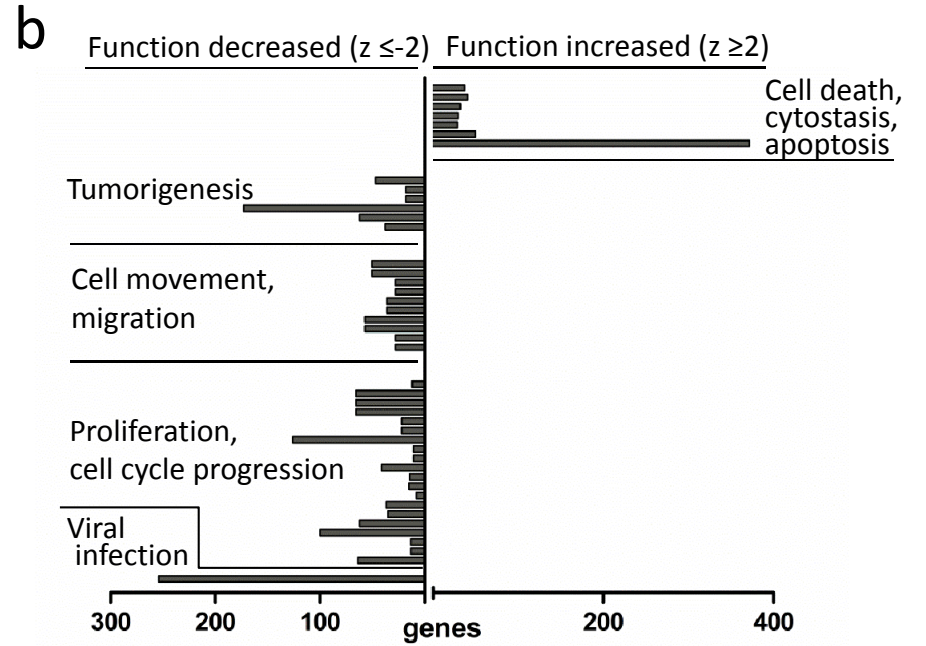

---

**Figure S7. Gene expression profiling of melanoma cells treated with AZD6244+BEZ235+TRAIL indicates significant increase of biological functions related to cell death. (a)**, Edwards-VENN diagram analysis of significantly modulated genes (upper panel, upregulated genes; lower panel, downregulated genes) in Me13 cells treated with AZD6244 (red rectangle), or BEZ235 (blue rectangle) or AZD6244+TRAIL (fuchsia shape), TRAIL (green cogwheel) or the AZD6244+BEZ235+TRAIL association (light blue circle). **(b)**, Downstream effect analysis (by IPA) based on the two subsets of genes identified by the light blue circles in panel **a**. See Table **S3** for the list of genes. Only biological functions with significant z score statistic ( $>2$ , indicating increase of biological function, or  $<-2$ , indicating decrease of biological function) and significant overlap p value are shown.

a

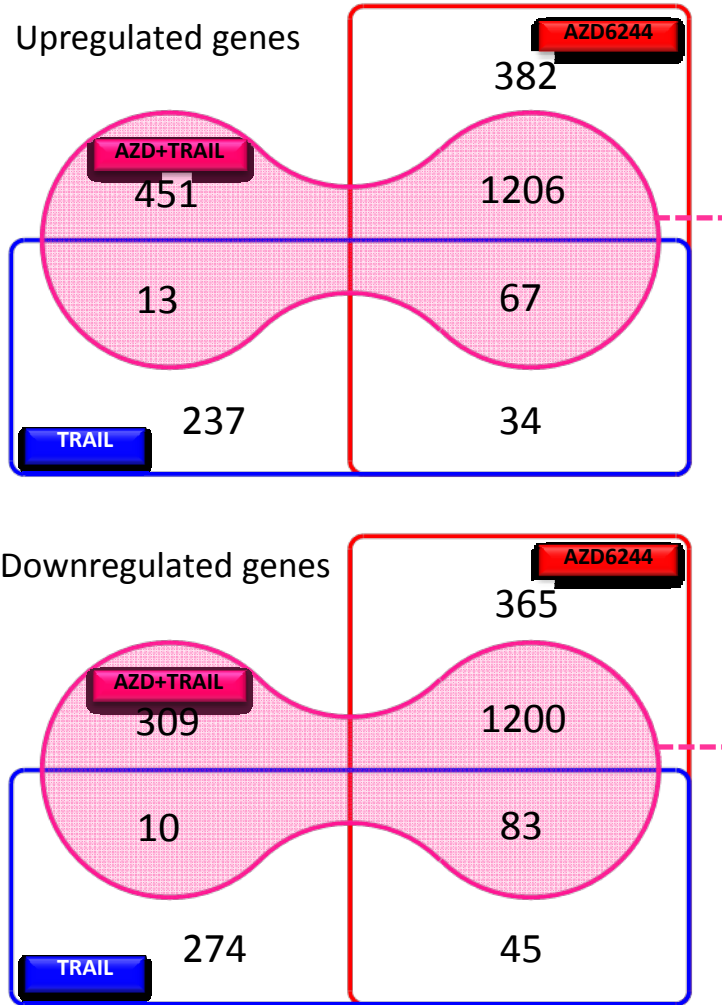

b

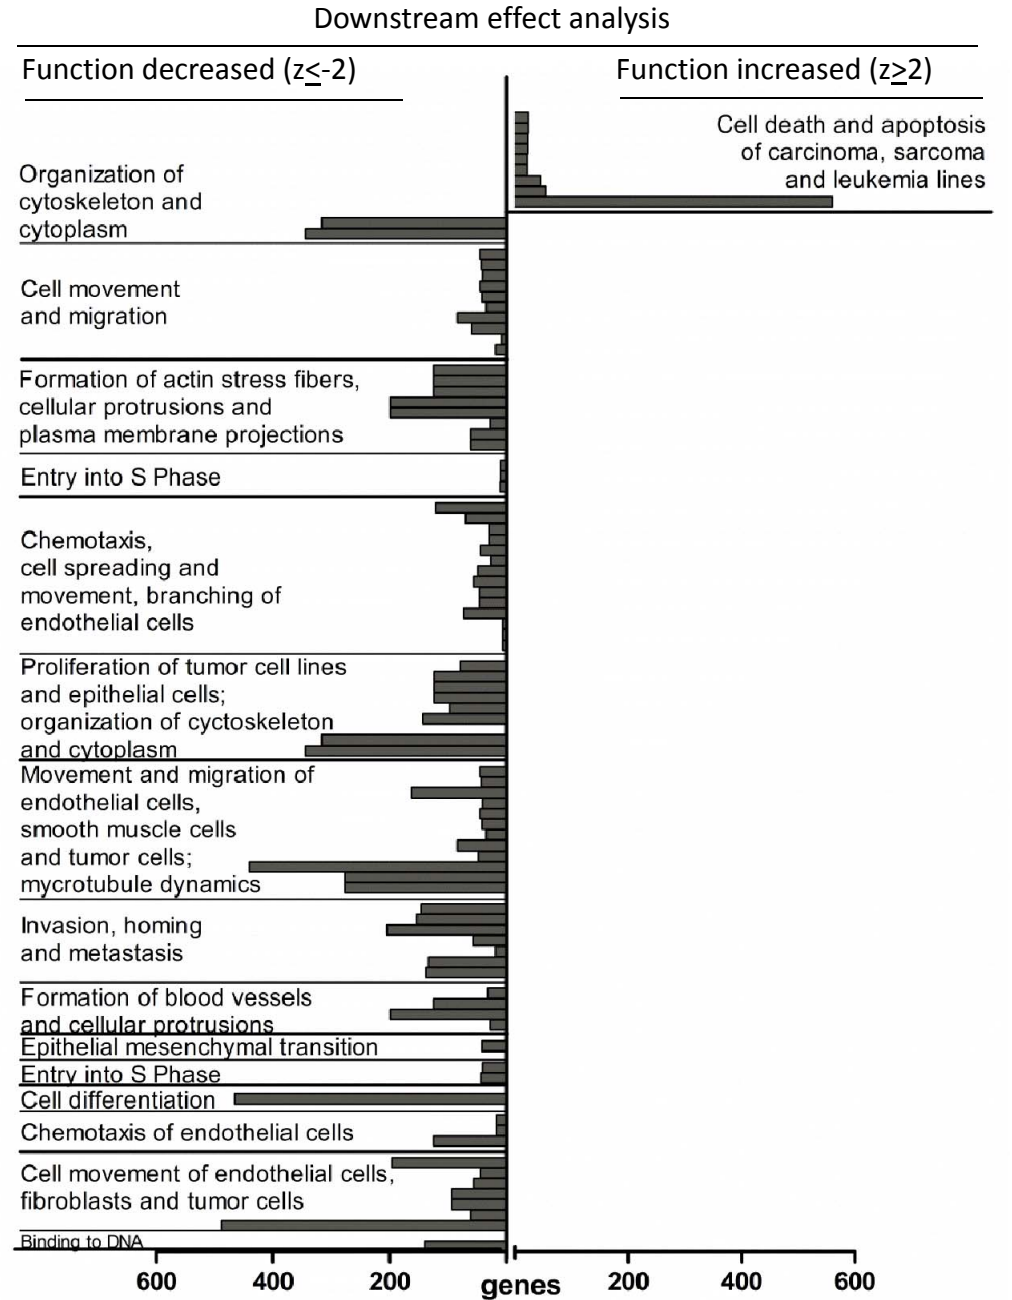

---

**Figure S8. Gene expression profiling of melanoma cells treated with AZD6244, TRAIL and their combination. (a)**, Edwards-VENN diagram analysis of significantly modulated genes (upper panel, upregulated genes; lower panel, downregulated genes) in ME13 cells treated with AZD6244 (red rectangle), or TRAIL (blue rectangle) or AZD6244+TRAIL (fuchsia shape). **(b)**, Downstream effect analysis (by IPA) based on the two subsets of genes identified by the fuchsia shape in panel **a**. Only biological functions with significant Z score statistic ( $>2$ , indicating increase of biological function, or  $<-2$ , indicating decrease of biological function) and significant overlap P value are shown. See **Table S4** for the list of genes mentioned in panel B.

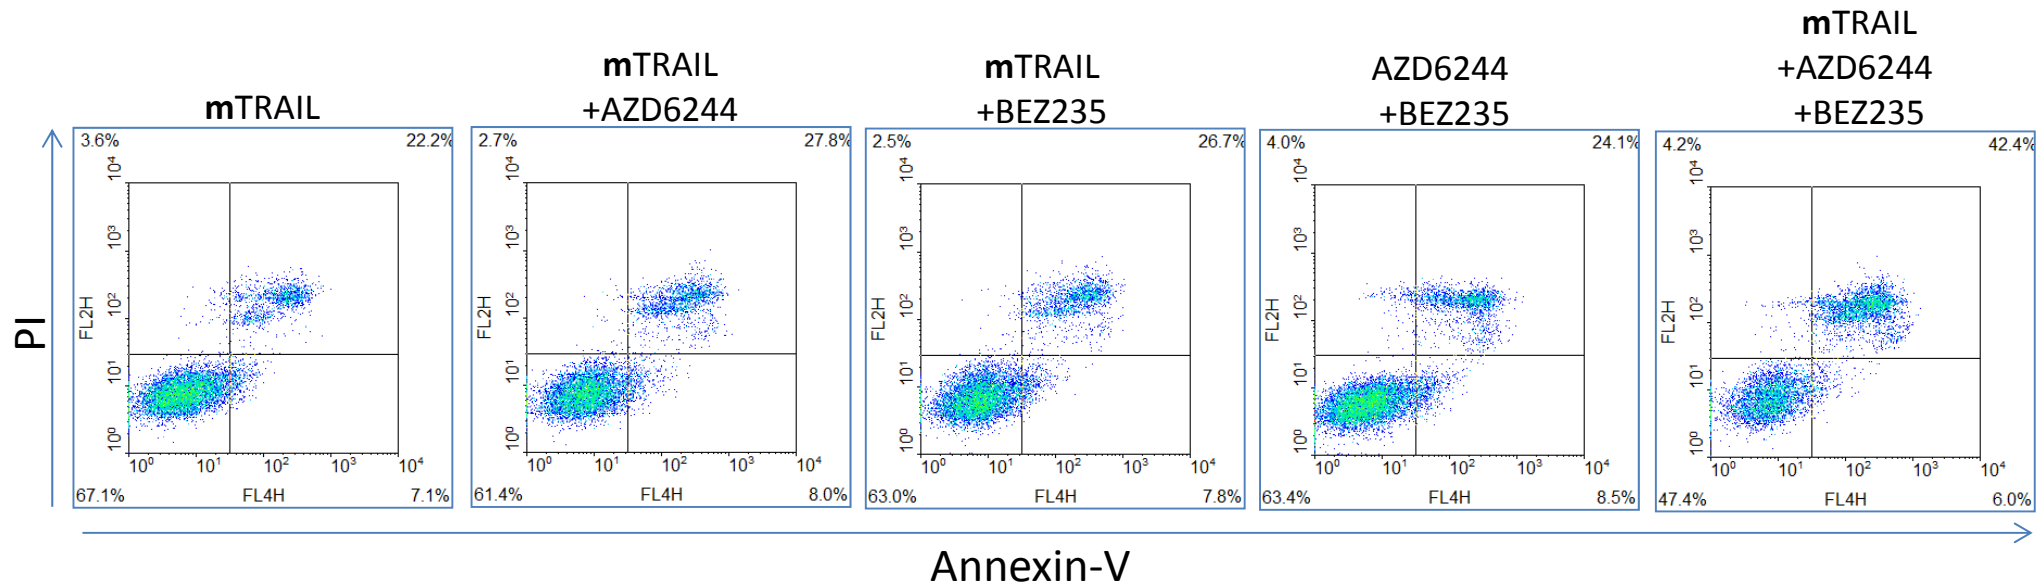

**Figure S9. Enhanced melanoma apoptosis by association of mTRAIL with AZD6244 and BEZ235.** Melanoma cells (Me1), stained with CFSE as described in ref. 25, were treated with AZD6244 (0.05 mM), BEZ235 (0.05 mM) or both inhibitors, and then co-cultured with CD34<sup>+</sup> cells transduced with an adenoviral vector encoding human TRAIL (mTRAIL, ref. 27). Extent of melanoma apoptosis was assessed at 72 h by staining for annexin-V and Propidium iodide (PI) after gating on CFSE<sup>+</sup> melanoma cells. Numbers in each dotplot indicate % of cells in each of the four quadrants.

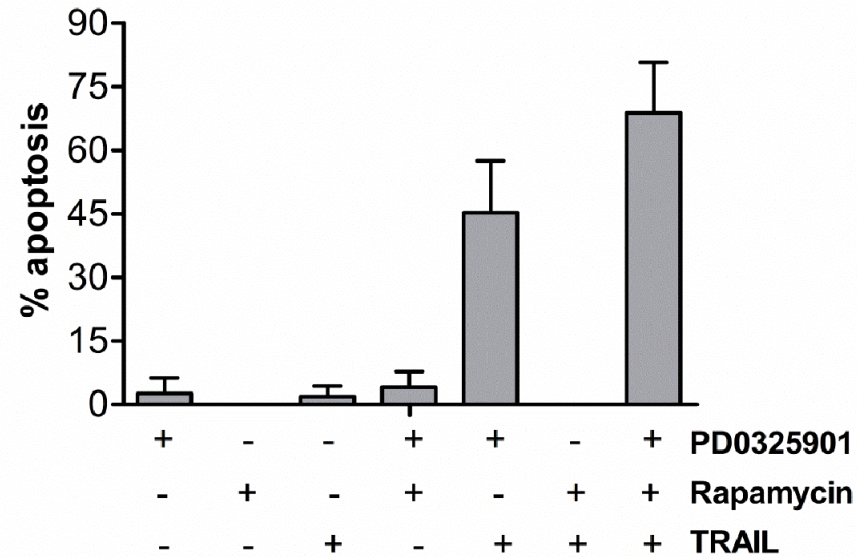

**Figure S10. Enhanced melanoma apoptosis by association of TRAIL with PD0325901 and rapamycin.** Me13 cells were treated with TRAIL (10 ng/mL), PD0325901 (5 nM), rapamycin (10 nM) or their combinations. Apoptosis was assessed at 72 h by flow cytometry. Apoptosis induced by the PD0325901/rapamycin/TRAIL and PD0325901/TRAIL combinations was significantly higher compared to the effects of single agents and of the PD0325901/rapamycin and rapamycin/TRAIL associations. Mean values ( $\pm$  S.D.) for three independent experiments ( $p < 0.001$  for all comparisons, by ANOVA and SNK test).

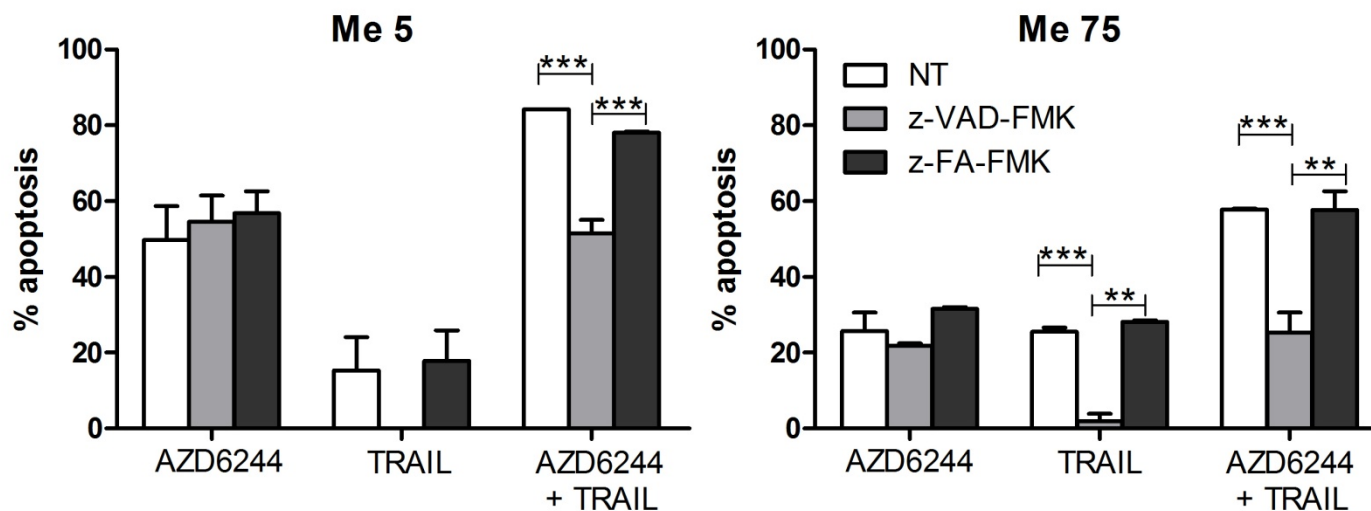

**Figure S11. The association of AZD6244 and TRAIL promotes caspase-dependent melanoma apoptosis.** Melanoma cell lines Me5 and Me75 were treated with AZD6244 (0.05  $\mu$ M), or TRAIL (25 ng/mL) or their combinations for 72 h, in the presence of the pancaspase inhibitor z-VAD-fmk or of the negative control peptide z-FA-fmk, and apoptosis was assessed by Annexin-V/PI assay. Results shown as sum of early (annexin-V<sup>+</sup> PI<sup>-</sup>) and late (annexin-V<sup>+</sup> PI<sup>+</sup>) apoptosis values. Mean values ( $\pm$  S.D.) for three independent experiments. Statistical analysis by ANOVA followed by SNK test. \*\*\*: p<0.001, \*\*: p<0.01.

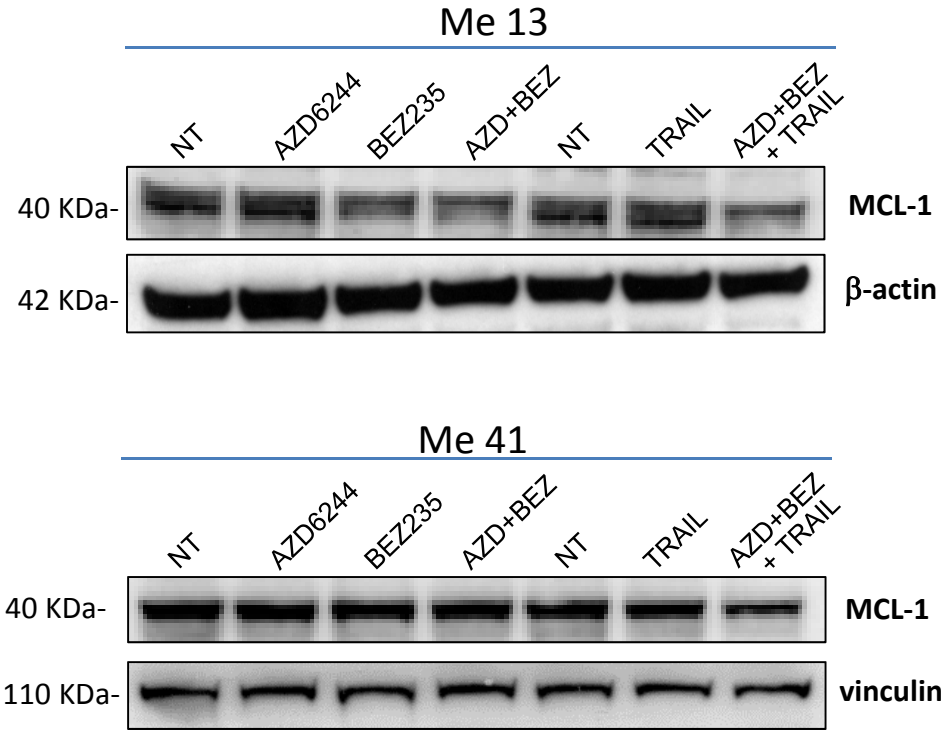

**Figure S12. Modulation of Mcl-1 in melanoma cells treated with TRAIL, AZD6244, BEZ235 and their combinations.** Modulation of MCL-1 expression by AZD6244, BEZ235, TRAIL and their combination assessed in two melanoma cell lines (Me 13 and Me 41) by Western Blot analysis at 48h of treatment.
