# Supplementary material for: Synergistic anti-tumor activity and inhibition of angiogenesis by cotargeting of oncogenic and death receptor pathways in human melanoma
Source: PubMed Central journal article supplement (PMC4649516; doi:10.1038/cddis.2014.410), 2014-10-02
Supplement: cddis2014410x5.pdf [file cddis2014410x5.pdf]

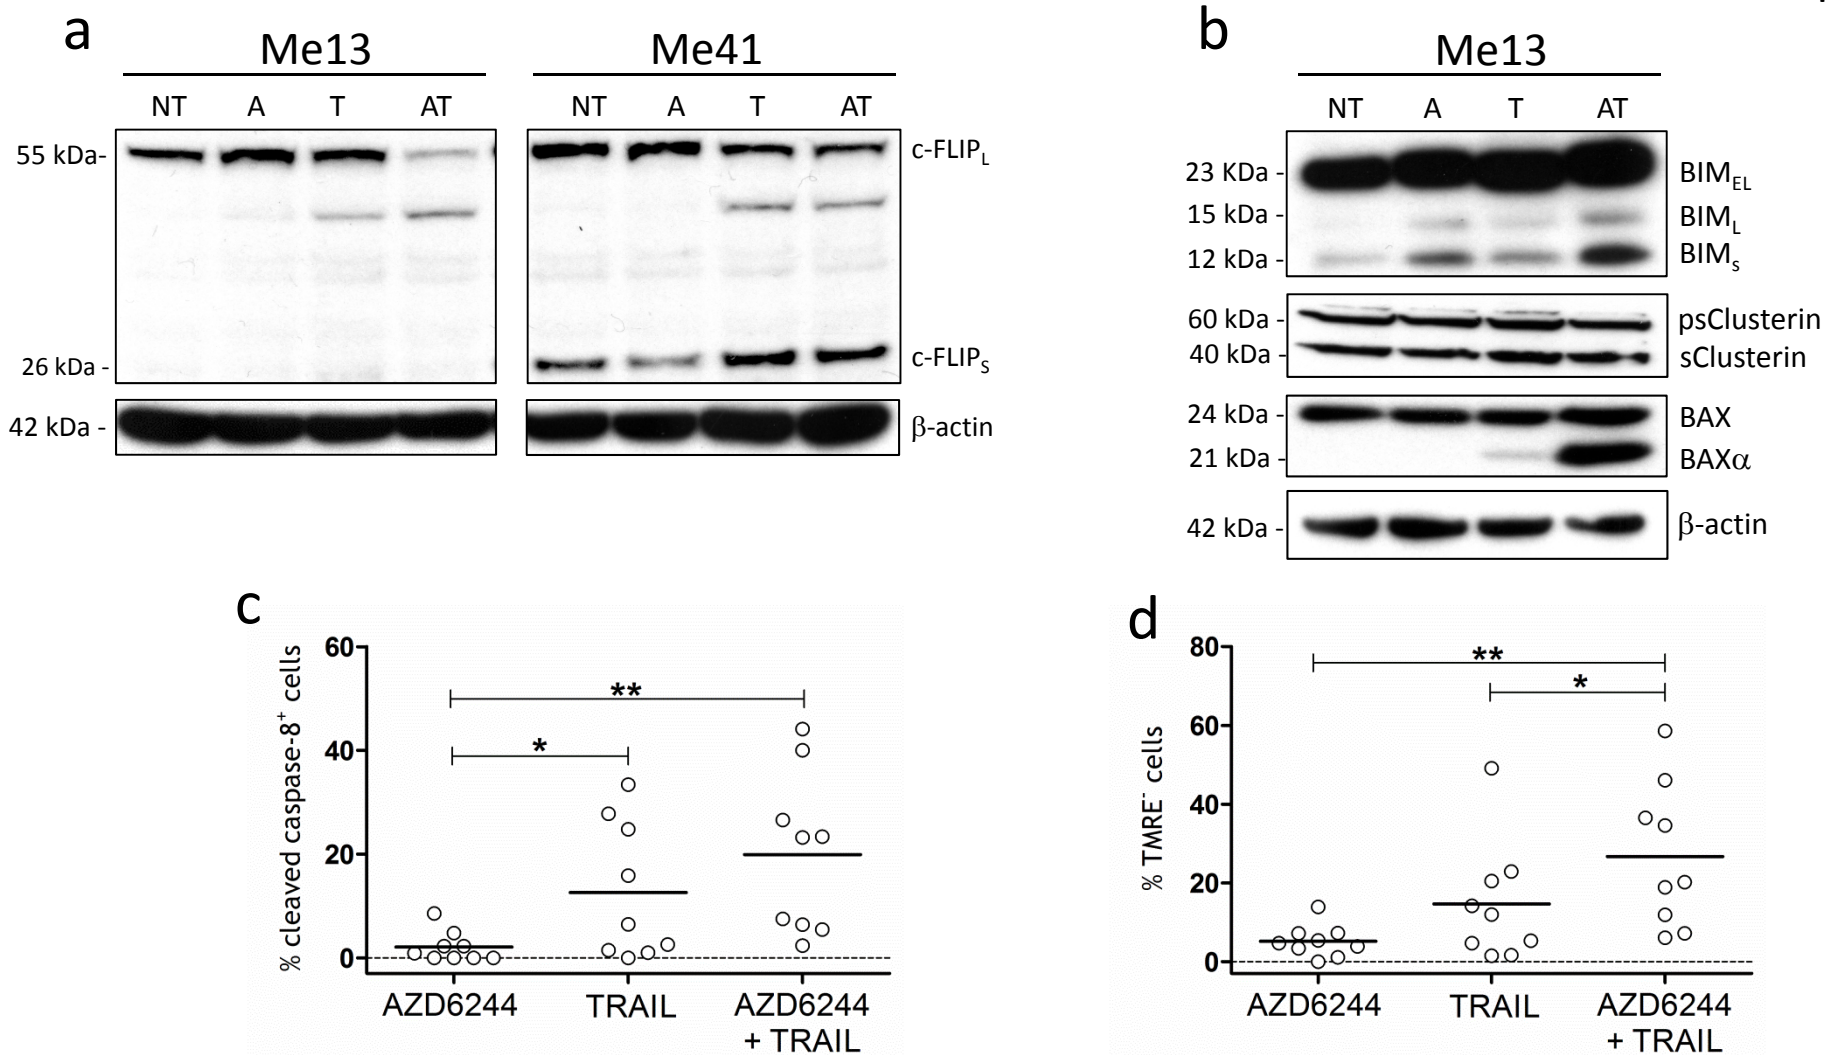

**Figure S13. Modulation of pro- and anti-apoptotic molecules by melanoma treatment with the association of AZD6244 and TRAIL . (a),** western blot analysis for c-FLIP expression in two melanoma cell lines (Me13 and Me41) treated with AZD6244 (A), TRAIL (T) or their combination (AT). **(b),** western blot analysis for expression of BIM, clusterin and BAX in Me13 cells treated as in **(a)**. **(c),** cleaved caspase-8 analysis in a panel of 9 cell lines treated as in **(a)**. **(d),** TMRE analysis for mitochondrial depolarization in a panel of 9 melanoma cell lines treated as in **(a)**. Statistical analysis in **c, d** by ANOVA followed by SNK test; \*\*,  $p < 0.01$ ; \*,  $p < 0.05$ .

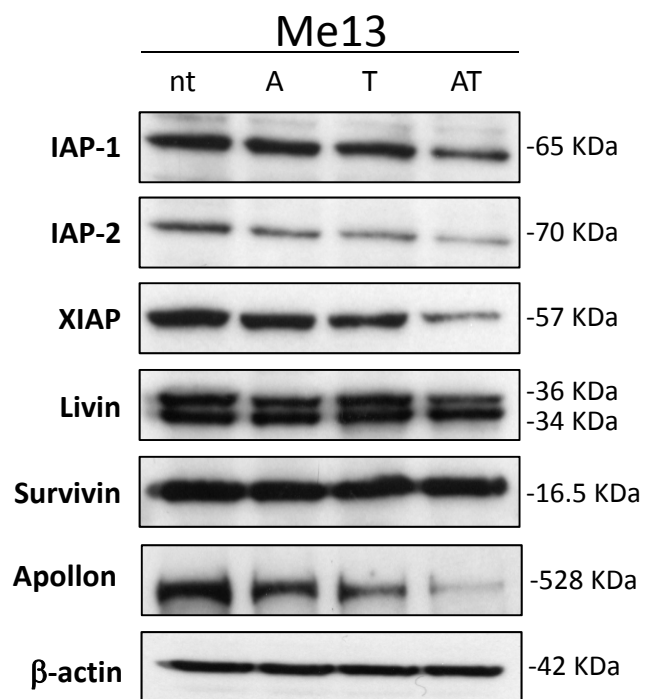

**Figure S14.** Modulation of the indicated IAP proteins by treatment of melanoma cells (Me13) with AZD6244 (A), or TRAIL (T) or AZD/TRAIL (AT) combination.

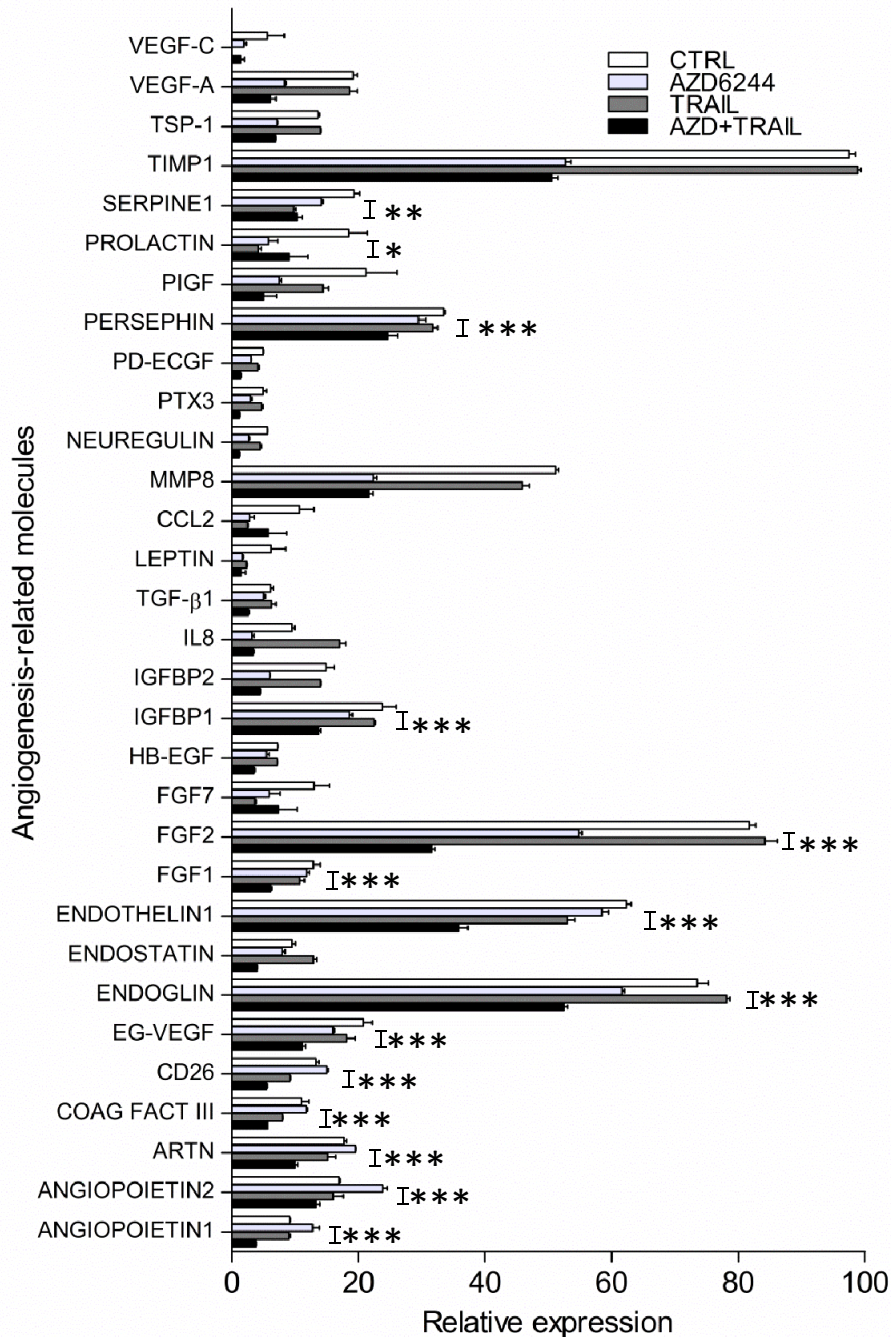

**Figure S15. Modulation of angiogenesis-related molecules in Me13 cells treated with AZD6244, TRAIL and their combination.** Modulation of the indicated molecule was assessed by protein array screening at 24 h after melanoma culture in the presence of the indicated drugs and drug combinations. AZD6244, and TRAIL were used at 0.1 μM, and 25 ng/mL respectively. All molecules shown in the figure were significantly modulated, compared to control untreated cells, by the AZD6244+TRAIL combination (P at least <0.05, by ANOVA and SNK test). In addition, the indicated statistical comparisons highlight instances where protein modulation by AZD6244+TRAIL is significantly different compared to results achieved by AZD6244 treatment. \*\*\*: p<0.001, \*\*: p<0.01; \*: P<0.05.
