# Supplementary material for: Synergistic anti-tumor activity and inhibition of angiogenesis by cotargeting of oncogenic and death receptor pathways in human melanoma
Source: PubMed Central journal article supplement (PMC4649516; doi:10.1038/cddis.2014.410), 2014-10-02
Supplement: cddis2014410x6.pdf [file cddis2014410x6.pdf]

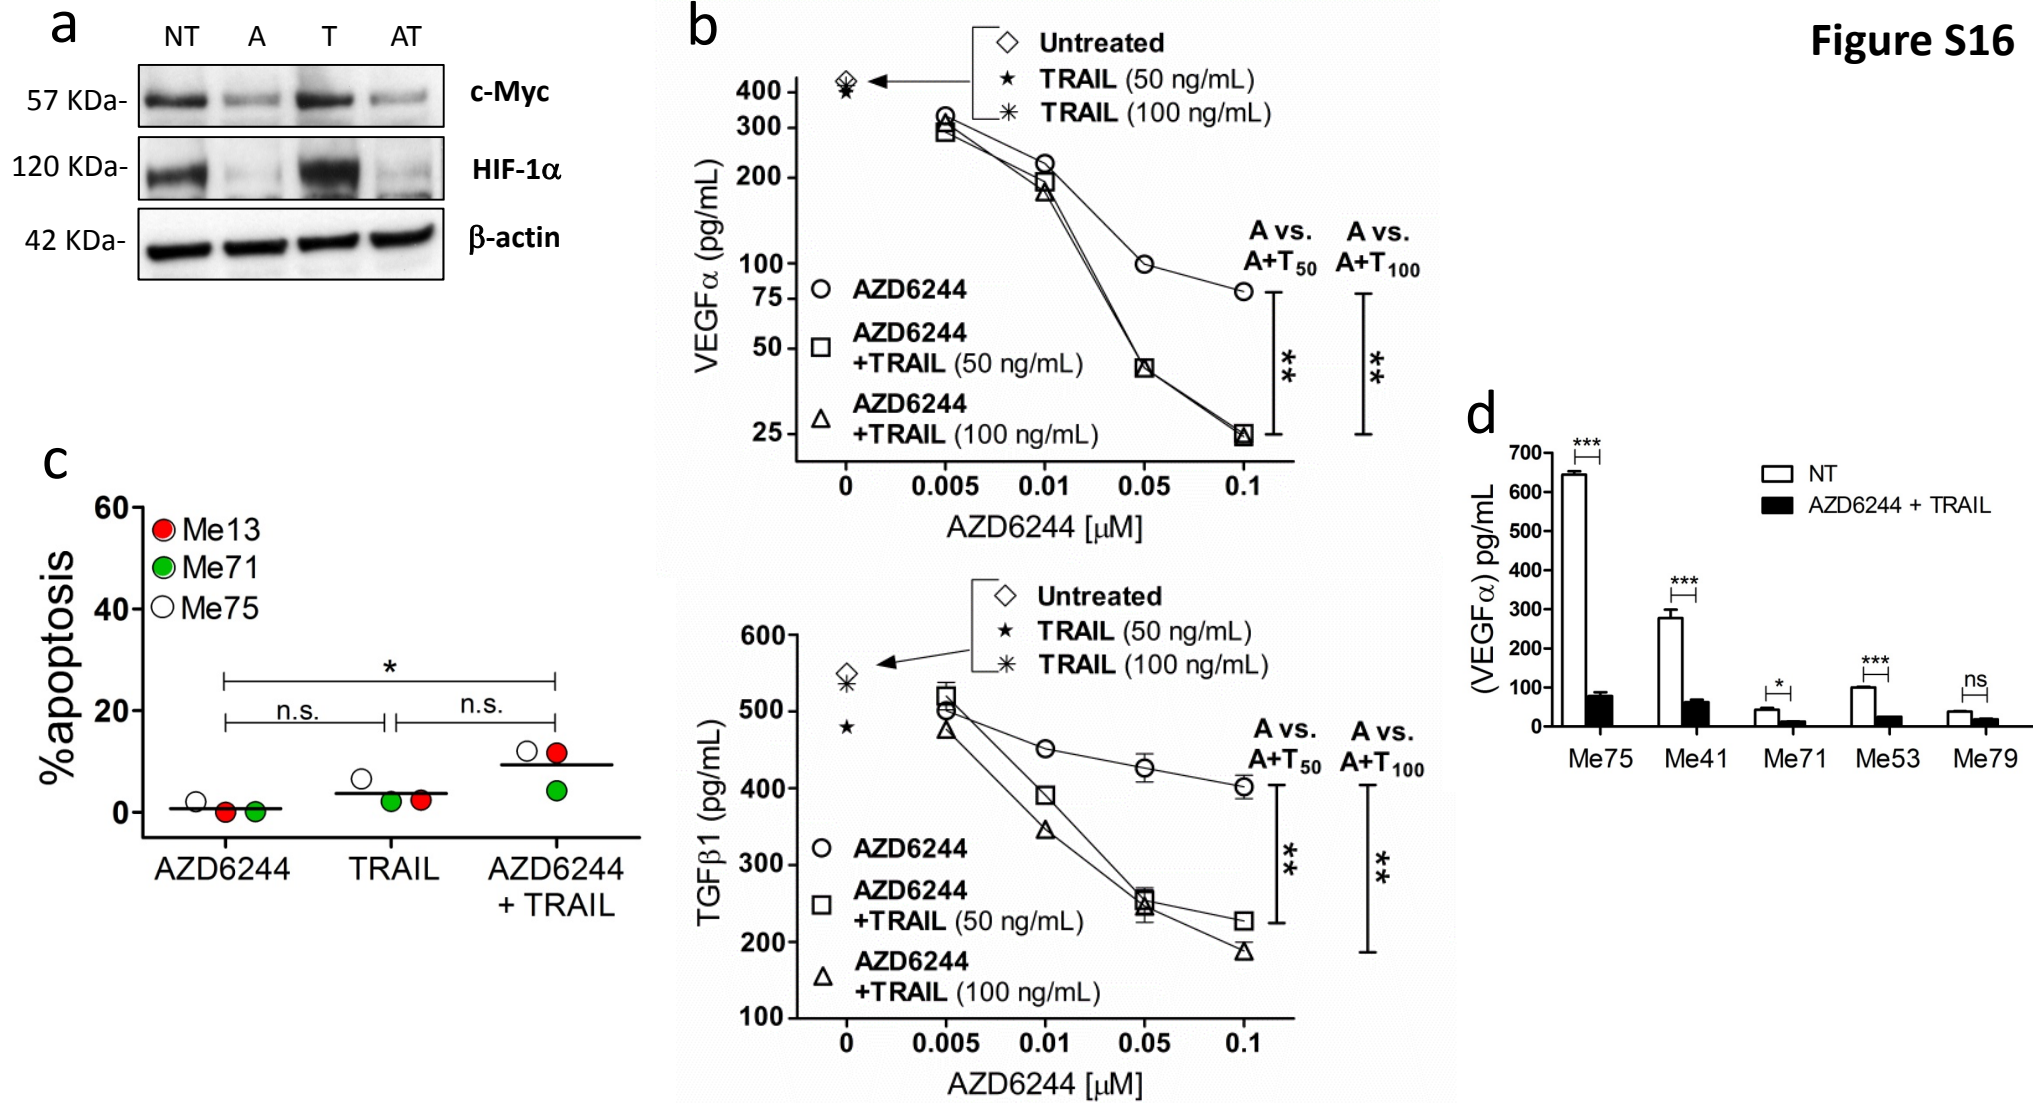

**Figure S16. Inhibition of pro-angiogenic molecules in vitro by AZD6244 plus TRAIL treatment of melanoma cells. (a),** Western blot analysis for Myc and HIF-1α in Me13 cells treated for 18 h in-vitro with AZD6244 (A), TRAIL (T) or their combination. **(b),** Secretion of VEGFα and TGFβ1 by Me13 treated in-vitro for 18 h with AZD6244, or TRAIL or their association. **(c),** apoptosis assay on three melanoma cell lines treated for 18 h with the AZD6244-TRAIL association (AZD6244= 0.05 μM; TRAIL=50 ng/mL). **(d),** Inhibition of VEGFα secretion in five melanoma cell lines by AZD6244+TRAIL treatment for 18 h as in (c). Statistical analysis in (b,c, d) by ANOVA and SNK test; \*\*\*: p<0.001; \*\*: p<0.01; \*: p<0.05.



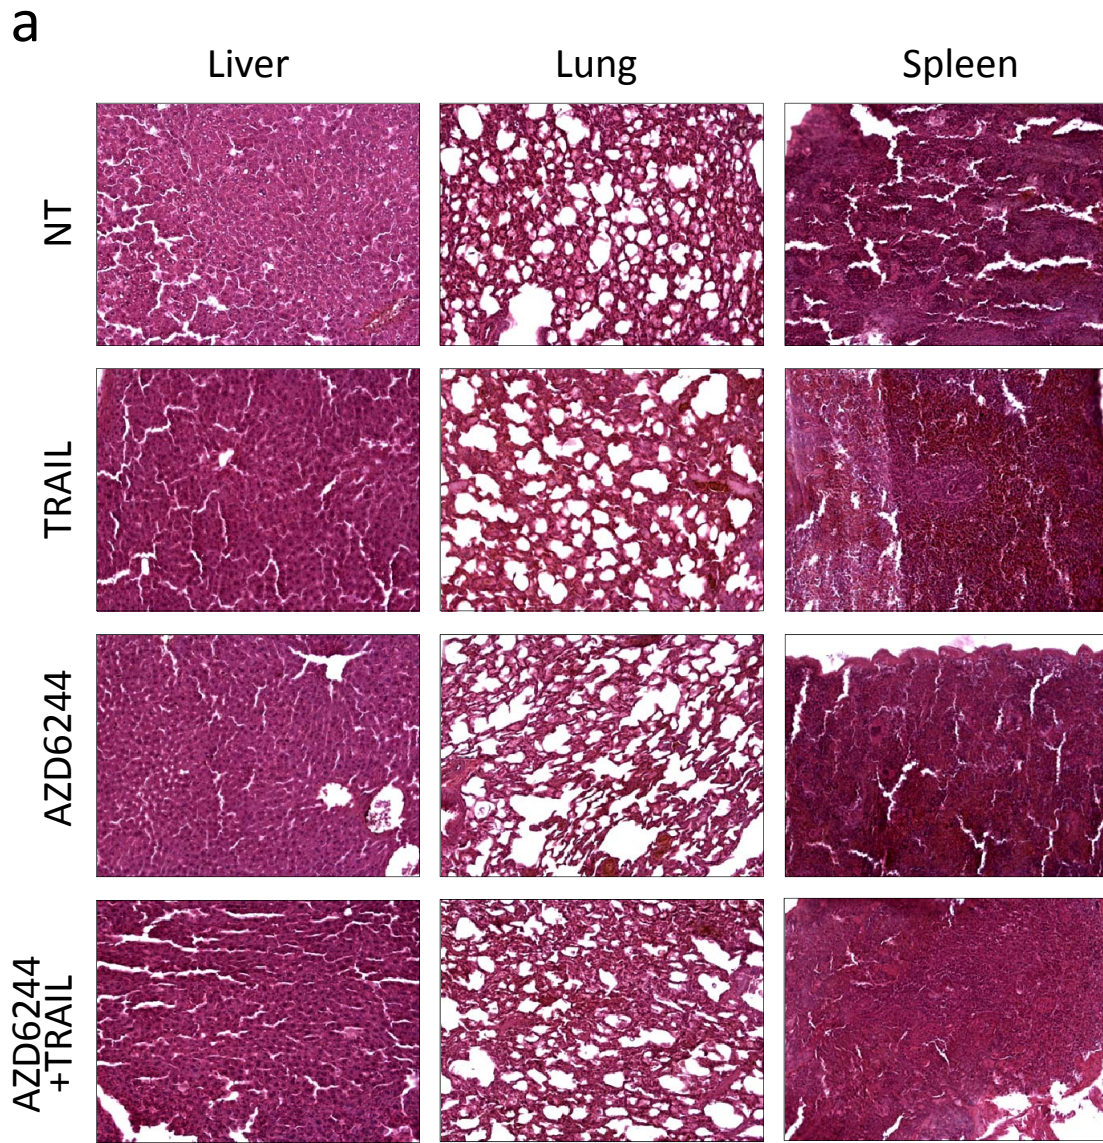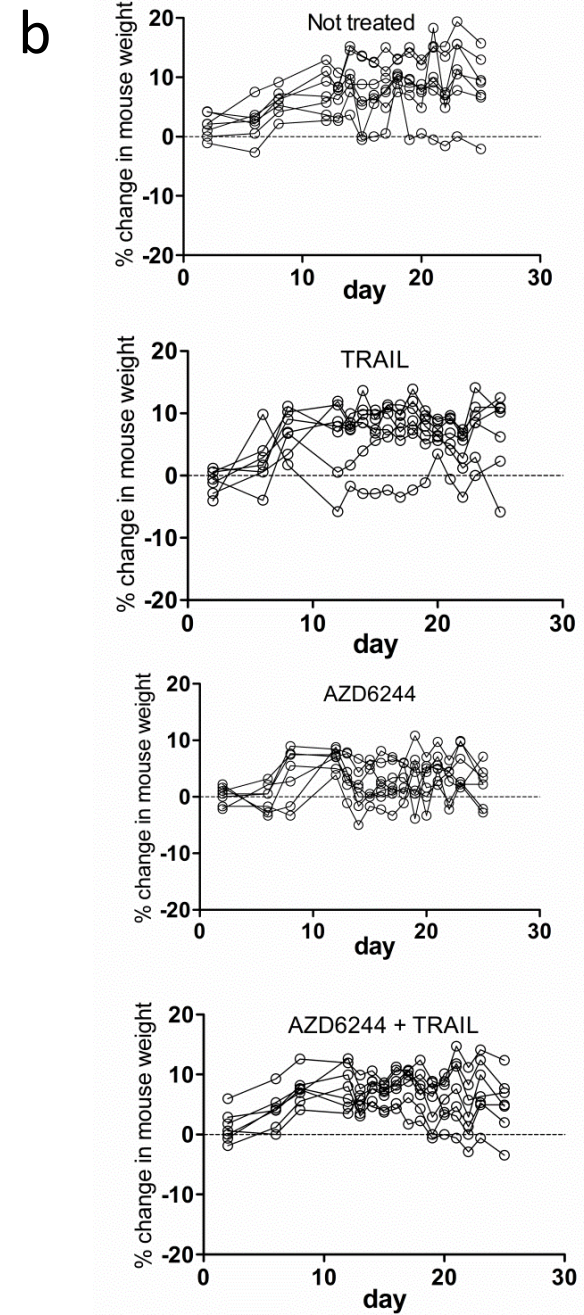

---

**Figure S17. Tissue and body weight analysis of mice treated with AZD6244, TRAIL and their combination. (a)**, representative EE stainings of tissue sections from liver, lung and spleen of control and treated mice. **(b)**, body weight analysis of individual mice (n=7/treatment group) during treatment with AZD6244, TRAIL and their combination. Results shown as % change in body weight compared to pre-treatment values of each mouse.
