# Supplementary material for: Synergistic anti-tumor activity and inhibition of angiogenesis by cotargeting of oncogenic and death receptor pathways in human melanoma
Source: PubMed Central journal article supplement (PMC4649516; doi:10.1038/cddis.2014.410), 2014-10-02
Supplement: cddis2014410x7.pdf [file cddis2014410x7.pdf]

Table S1

## Molecular and biological features of melanoma cell lines used in this study

| Tumor code used in this study | Tissue of origin of cell line <sup>a</sup> | Molecular features of the cell lines <sup>b</sup> |                                 |                     | Susceptibility to TRAIL <sup>c</sup><br>(MTT assay, 100ng/mL, 48h) |                                                          |                                                               | Susceptibility to MEK and PI3K/mTOR inhibitors <sup>d</sup><br>(MTT assay, 48 h) |                                | Tumor code used in previous papers | References      |
|-------------------------------|--------------------------------------------|---------------------------------------------------|---------------------------------|---------------------|--------------------------------------------------------------------|----------------------------------------------------------|---------------------------------------------------------------|----------------------------------------------------------------------------------|--------------------------------|------------------------------------|-----------------|
|                               |                                            | BRAF/NRAS status                                  | PTEN status (gene/protein)      | p53 status          | Growth inhibition (% dead cells)                                   | Mitochondrial depolarization (% TMRE <sup>+</sup> cells) | Caspase-8 activation (% cleaved caspase 8 <sup>+</sup> cells) | AZD6244 (IC <sub>50</sub> , μM)                                                  | BEZ235 (IC <sub>50</sub> , μM) |                                    |                 |
| Me1                           | In met.                                    | BRAF <sup>V600E</sup>                             | wt/+                            | wt                  | 94.1                                                               | 49.0                                                     | 28.0                                                          | 0.050                                                                            | 0.080                          | Me14464                            | 27, 42, 48      |
| Me2                           | In met.                                    | BRAF <sup>V600E</sup>                             | wt/+                            | wt                  | 76.5                                                               | 58.0                                                     | 32.0                                                          | 0.120                                                                            | 0.225                          | Me4023                             | 27, 48          |
| Me5                           | s.c. met.                                  | BRAF <sup>V600E</sup>                             | ex.5 del <sub>403-409</sub> /-  | wt                  | 26.0                                                               | 12.2                                                     | 16.0                                                          | 0.015                                                                            | 0.070                          | -                                  | This manuscript |
| Me6                           | s.c. met.                                  | BRAF <sup>V600E</sup>                             | wt/+                            | wt                  | 28.0                                                               | 43.6                                                     | 28.3                                                          | 0.350                                                                            | 0.088                          | Me6824                             | 42              |
| Me13                          | In met.                                    | BRAF <sup>V600E</sup>                             | wt/+                            | wt                  | 6.2                                                                | 4.7                                                      | 2.6                                                           | 0.308                                                                            | 0.109                          | Me15392                            | 27, 42, 48      |
| Me15                          | In met.                                    | BRAF <sup>V600E</sup>                             | wt/+                            | wt                  | 96.4                                                               | 14.2                                                     | 33.0                                                          | 0.015                                                                            | 0.045                          | Me23682                            | 27              |
| Me17                          | In met.                                    | BRAF <sup>V600E</sup>                             | wt/+                            | C135W <sup>Ho</sup> | 4.0                                                                | 1.7                                                      | 4.5                                                           | 0.029                                                                            | 0.092                          | -                                  | This manuscript |
| Me20                          | In met.                                    | NRAS <sup>Q61R</sup>                              | wt/+                            | wt                  | 9.3                                                                | 26.7                                                     | 19.0                                                          | 0.010                                                                            | 2.520                          | Me18816                            | 42              |
| Me25                          | local recurrence                           | BRAF <sup>V600E</sup>                             | wt/+                            | Y236H               | 10.4                                                               | 5.5                                                      | 0.0                                                           | 0.328                                                                            | 0.110                          | Me1402r                            | 48              |
| Me27                          | In met.                                    | BRAF <sup>V600E</sup>                             | wt/-                            | wt                  | 17.0                                                               | 19.6                                                     | 16.3                                                          | 0.186                                                                            | 0.178                          | Me13294                            | 27              |
| Me30                          | In met.                                    | BRAF <sup>V600E</sup>                             | wt/+                            | wt                  | 44.6                                                               | 1.6                                                      | 4.5                                                           | 0.058                                                                            | 0.586                          | Me18656                            | 27, 42, 48      |
| Me32                          | VGP primary me.                            | NRAS <sup>G12S</sup>                              | wt/+                            | wt                  | 87.4                                                               | 23.9                                                     | 0.1                                                           | 0.410                                                                            | 0.030                          | Me9923p                            | 48              |
| Me33                          | In met.                                    | BRAF <sup>V600E</sup>                             | wt/+                            | wt                  | 0.0                                                                | 0.0                                                      | 0.5                                                           | 0.023                                                                            | 0.283                          | -                                  | This manuscript |
| Me34                          | In met.                                    | NRAS <sup>Q61R</sup>                              | wt/+                            | Y126H <sup>Ho</sup> | 71.5                                                               | 15.3                                                     | 14.4                                                          | 0.560                                                                            | 0.030                          | -                                  | This manuscript |
| Me36                          | In met.                                    | wt/wt                                             | wt/+                            | wt                  | 30.0                                                               | 0.5                                                      | 5.7                                                           | 0.780                                                                            | 1.630                          | Me879                              | 48              |
| Me40                          | In met.                                    | BRAF <sup>V600E</sup>                             | wt/-                            | wt                  | 1.5                                                                | 0.1                                                      | 17.3                                                          | 0.280                                                                            | 0.100                          | -                                  | This manuscript |
| Me41                          | In met.                                    | BRAF <sup>V600E</sup>                             | wt/+                            | wt                  | 35.0                                                               | 20.5                                                     | 6.5                                                           | 0.020                                                                            | 0.048                          | Me32562                            | 42              |
| Me43                          | In met.                                    | BRAF <sup>V600E</sup>                             | wt/+                            | wt                  | 42.2                                                               | 2.2                                                      | 13.1                                                          | 0.029                                                                            | 0.168                          | Me18732                            | 27, 42, 48      |
| Me44                          | In met.                                    | BRAF <sup>V600E</sup>                             | wt/+                            | wt                  | 4.7                                                                | 0.6                                                      | 7.0                                                           | 0.050                                                                            | 0.220                          | Me16938                            | 42              |
| Me46                          | s.c. met.                                  | BRAF <sup>V600E</sup>                             | wt/+                            | wt                  | 7.9                                                                | 1.5                                                      | 1.0                                                           | 0.020                                                                            | 0.030                          | -                                  | This manuscript |
| Me49                          | In met.                                    | BRAF <sup>V600E</sup>                             | P246S/+                         | S127F <sup>Ho</sup> | 19.8                                                               | 0.0                                                      | 1.1                                                           | 0.049                                                                            | 0.089                          | Me2211                             | 27, 42, 48      |
| Me50                          | In met.                                    | BRAF <sup>V600E</sup>                             | P246S <sup>He</sup> /+          | S127F <sup>Ho</sup> | 53.4                                                               | 12.6                                                     | 9.5                                                           | 0.060                                                                            | 0.160                          | -                                  | This manuscript |
| Me53                          | s.c. met.                                  | BRAF <sup>V600E</sup>                             | wt/+                            | wt                  | 44.0                                                               | 17.6                                                     | 12.0                                                          | 0.288                                                                            | 0.012                          | Me32669                            | 27, 42          |
| Me55                          | In met.                                    | wt/wt                                             | wt/+                            | wt                  | 63.0                                                               | 9.7                                                      | 20.0                                                          | 0.720                                                                            | 1.140                          | Me3700                             | 42              |
| Me56                          | In met.                                    | BRAF <sup>V600E</sup>                             | P38S/-                          | S127F               | 8.1                                                                | 0.0                                                      | 3.6                                                           | 0.012                                                                            | 3.679                          | Me4686                             | 48              |
| Me57                          | VGP primary me.                            | wt/wt                                             | wt/+                            | R213R               | 2.4                                                                | 3.2                                                      | 0.6                                                           | 0.020                                                                            | 0.020                          | Me1007                             | 48              |
| Me58                          | In met.                                    | BRAF <sup>V600E</sup>                             | wt/+                            | wt                  | 11.0                                                               | 22.9                                                     | 12.0                                                          | 0.387                                                                            | 5.429                          | Me2559                             | 42              |
| Me59                          | In met.                                    | NRAS <sup>Q61R</sup>                              | wt/+                            | wt                  | 29.4                                                               | 21.7                                                     | 0.0                                                           | 0.030                                                                            | 0.590                          | Me4473                             | 42, 48          |
| Me63                          | In met.                                    | BRAF <sup>V600E</sup>                             | Y223STOP <sup>He</sup> / -      | wt                  | 25.8                                                               | 3.1                                                      | 0.8                                                           | 0.085                                                                            | 4.796                          | -                                  | This manuscript |
| Me64                          | In met.                                    | wt/wt                                             | nd/+                            | wt                  | 3.3                                                                | 0.8                                                      | 1.7                                                           | 0.050                                                                            | 0.020                          | Me13923                            | 48              |
| Me67                          | soft tissue met.                           | NRAS <sup>Q61R</sup>                              | wt/+                            | R213R <sup>He</sup> | 92.5                                                               | 25.5                                                     | 25.0                                                          | 9.770                                                                            | 0.380                          | Me3044                             | 42              |
| Me69                          | In met.                                    | BRAF <sup>V600E</sup>                             | wt/+                            | Y234C               | 46.7                                                               | 15.5                                                     | 10.5                                                          | 0.214                                                                            | 12.882                         | Me17697                            | 48              |
| Me71                          | In met.                                    | BRAF <sup>V600E</sup>                             | wt/+                            | wt                  | 3.5                                                                | 17.7                                                     | 25.0                                                          | 0.010                                                                            | 0.047                          | Me21158                            | 27, 42          |
| Me73                          | In met.                                    | BRAF <sup>V600E</sup>                             | del <sub>ex 3-5-6</sub> /-      | P128S <sup>He</sup> | 18.0                                                               | 5.3                                                      | 0.0                                                           | 0.019                                                                            | 0.062                          | Me1274                             | 42              |
| Me75                          | VGP primary me.                            | BRAF <sup>V600E</sup>                             | wt/+                            | wt                  | 0.0                                                                | 1.5                                                      | 5.8                                                           | 0.047                                                                            | 0.222                          | Me10258                            | 42              |
| Me76                          | In met.                                    | BRAF <sup>V600E</sup>                             | wt/+                            | E258K               | 21.4                                                               | 0.0                                                      | 0.8                                                           | 0.016                                                                            | 0.067                          | Me14362                            | 27, 42, 48      |
| Me78                          | In met.                                    | BRAF <sup>V600E</sup>                             | wt/+                            | wt                  | 10.5                                                               | 0.0                                                      | 1.3                                                           | 0.069                                                                            | 6.098                          | -                                  | This manuscript |
| Me79                          | In met.                                    | BRAF <sup>V600E</sup>                             | wt/+                            | wt                  | 17.0                                                               | 4.3                                                      | 1.9                                                           | 1.224                                                                            | 96.746                         | Me2934                             | 27, 42, 48      |
| Me83                          | In met.                                    | wt/wt                                             | Q171Q / +                       | wt                  | 65.7                                                               | 13.8                                                     | 11.0                                                          | 0.120                                                                            | 0.100                          | Me2352                             | 27, 42          |
| Me85                          | VGP primary me.                            | BRAF <sup>V600E</sup>                             | wt/+                            | wt                  | 49.0                                                               | 38.9                                                     | 6.3                                                           | 0.014                                                                            | 0.525                          | -                                  | This manuscript |
| Me86                          | soft tissue met.                           | NRAS <sup>Q61R</sup>                              | wt/+                            | wt                  | 48.1                                                               | 23.0                                                     | 22.0                                                          | 0.020                                                                            | 0.200                          | Me15094                            | 27              |
| Me88                          | In met.                                    | wt/wt                                             | wt/+                            | wt                  | 71.1                                                               | 12.0                                                     | 0.0                                                           | 0.020                                                                            | 0.160                          | Me19410                            | 42              |
| Me92                          | VGP primary me.                            | BRAF <sup>L596S</sup>                             | wt/+                            | G187S               | 0.7                                                                | 3.6                                                      | 0.0                                                           | 0.069                                                                            | 0.107                          | Me20842                            | 27, 42, 48      |
| Me93                          | In met.                                    | BRAF <sup>L596S</sup>                             | wt/+                            | wt                  | 8.5                                                                | 5.7                                                      | 0.9                                                           | 0.036                                                                            | 0.076                          | Me20842M1                          | 48              |
| Me94                          | s.c. met.                                  | BRAF <sup>L596S</sup>                             | wt/+                            | G187S               | 51.2                                                               | 12.2                                                     | 2.7                                                           | 0.018                                                                            | 0.048                          | Me20842M2                          | 48              |
| Me96                          | In met.                                    | BRAF <sup>V600E</sup>                             | wt/+                            | wt                  | 17.2                                                               | 0.0                                                      | 0.6                                                           | 0.030                                                                            | 0.280                          | Me9874                             | 42              |
| Me98                          | In met.                                    | BRAF <sup>V600E</sup>                             | nd/+                            | wt                  | 0.0                                                                | 0.5                                                      | 0.8                                                           | 0.042                                                                            | 0.048                          | Me29318                            | 42              |
| Me99                          | VGP primary me.                            | BRAF <sup>V600E</sup>                             | P89S, del <sub>ex 6-8</sub> / - | wt                  | 13.5                                                               | 2.0                                                      | 0.7                                                           | 8.697                                                                            | 0.212                          | Me26635                            | 42              |
| Me100                         | VGP primary me.                            | NRAS <sup>Q61R</sup>                              | wt/+                            | null                | 52.1                                                               | 0.0                                                      | 2.2                                                           | 0.120                                                                            | 0.560                          | Me4405                             | 27, 42, 48      |

<sup>a</sup> Melanoma cell lines were isolated from: vertical growth phase primary melanomas (VGP primary me.), lymph node metastases (In met.), subcutaneous metastases (s.c. met.), soft tissues metastases or local recurrences.

<sup>b</sup> Methods for identification of BRAF, NRAS, PTEN and p53 mutations are described in refs. 48, 49. PTEN data expressed as gene sequence data / protein expression by western blot. He: heterozygous; Ho: homozygous.

<sup>c</sup> Susceptibility to TRAIL was assessed by a 48 h MTT assay. Mitochondrial depolarization (TMRE assay) and caspase-8 cleavage in response to TRAIL were assessed at 24 h by flow cytometry.

<sup>d</sup> Susceptibility to AZD6244 and BEZ235, shown as IC<sub>50</sub> values, was assessed by a 48 h MTT assay. IC<sub>50</sub> values were obtained through non linear regression analysis of dose response curves. See Fig. 1A for representative examples of dose-response plots.

**Table S2. Statistical analysis of fraction affected (FA) data.**

**Comparison 1: High vs. low TRAIL doses in the AZD6244+BEZ235+TRAIL combination: significant FA increase at higher TRAIL doses**

|                                                              |                   | FA values in melanoma cells treated with the association |          |
|--------------------------------------------------------------|-------------------|----------------------------------------------------------|----------|
|                                                              |                   | 0.05 μM                                                  | 0.05 μM  |
| FA values in melanoma cells treated with the association of: | AZD6244 (0.05 μM) | 0.05 μM                                                  | 0.05 μM  |
|                                                              | BEZ235 (0.005 μM) | 0.005 μM                                                 | 0.005 μM |
|                                                              | TRAIL (5 ng/mL)   | 10 ng/mL                                                 | 25 ng/mL |
|                                                              |                   | ns                                                       | **       |
|                                                              | AZD6244 (0.05 μM) |                                                          | **       |
|                                                              | BEZ235 (0.005 μM) |                                                          |          |
|                                                              | TRAIL (10 ng/mL)  |                                                          |          |

|                                                              |                   | treated with the association of: |          |
|--------------------------------------------------------------|-------------------|----------------------------------|----------|
|                                                              |                   | 0.05 μM                          | 0.05 μM  |
| FA values in melanoma cells treated with the association of: | AZD6244 (0.05 μM) | 0.05 μM                          | 0.05 μM  |
|                                                              | BEZ235 (0.01 μM)  | 0.01 μM                          | 0.01 μM  |
|                                                              | TRAIL (5 ng/mL)   | 10 ng/mL                         | 25 ng/mL |
|                                                              |                   | ns                               | **       |
|                                                              | AZD6244 (0.05 μM) |                                  | **       |
|                                                              | BEZ235 (0.01 μM)  |                                  |          |
|                                                              | TRAIL (10 ng/mL)  |                                  |          |

|                                                              |                   | FA values in melanoma cells treated with the association |          |
|--------------------------------------------------------------|-------------------|----------------------------------------------------------|----------|
|                                                              |                   | 0.05 μM                                                  | 0.05 μM  |
| FA values in melanoma cells treated with the association of: | AZD6244 (0.05 μM) | 0.05 μM                                                  | 0.05 μM  |
|                                                              | BEZ235 (0.02 μM)  | 0.02 μM                                                  | 0.02 μM  |
|                                                              | TRAIL (5 ng/mL)   | 10 ng/mL                                                 | 25 ng/mL |
|                                                              |                   | ns                                                       | *        |
|                                                              | AZD6244 (0.05 μM) |                                                          | *        |
|                                                              | BEZ235 (0.02 μM)  |                                                          |          |
|                                                              | TRAIL (10 ng/mL)  |                                                          |          |

**Comparison 2: AZD6244+TRAIL vs. AZD6244+BEZ235+TRAIL: significant FA increase by adding BEZ235**

|                                                              |                   | FA values in melanoma cells treated with the association of: |         |         |          |          |          |          |          |          |
|--------------------------------------------------------------|-------------------|--------------------------------------------------------------|---------|---------|----------|----------|----------|----------|----------|----------|
|                                                              |                   | 0.05 μM                                                      | 0.05 μM | 0.05 μM | 0.05 μM  | 0.05 μM  | 0.05 μM  | 0.05 μM  | 0.05 μM  | 0.05 μM  |
| FA values in melanoma cells treated with the association of: | AZD6244 (0.05 μM) | 0.05 μM                                                      | 0.05 μM | 0.05 μM | 0.05 μM  | 0.05 μM  | 0.05 μM  | 0.05 μM  | 0.05 μM  | 0.05 μM  |
|                                                              | TRAIL (5 ng/mL)   | 0.005 μM                                                     | 0.01 μM | 0.02 μM | 0.005 μM | 0.01 μM  | 0.02 μM  | 0.005 μM | 0.01 μM  | 0.02 μM  |
|                                                              |                   | 5 ng/mL                                                      | 5 ng/mL | 5 ng/mL | 10 ng/mL | 10 ng/mL | 10 ng/mL | 25 ng/mL | 25 ng/mL | 25 ng/mL |
|                                                              |                   | *                                                            | **      | ***     | ns       | **       | ***      | ns       | **       | ***      |
|                                                              | AZD6244 (0.05 μM) |                                                              |         |         |          |          |          |          |          |          |
|                                                              | TRAIL (10 ng/mL)  |                                                              |         |         |          |          |          |          |          |          |
|                                                              | AZD6244 (0.05 μM) |                                                              |         |         |          |          |          |          |          |          |
|                                                              | TRAIL (25 ng/mL)  |                                                              |         |         |          |          |          |          |          |          |

**Comparison 3: AZD6244+BEZ235 vs AZD6244+BEZ235+TRAIL: Significant FA increase by adding high dose TRAIL**

|                                                              |                   | FA values in melanoma cells treated with the association of: |          |          |         |          |          |         |          |          |
|--------------------------------------------------------------|-------------------|--------------------------------------------------------------|----------|----------|---------|----------|----------|---------|----------|----------|
|                                                              |                   | 0.05 μM                                                      | 0.05 μM  | 0.05 μM  | 0.05 μM | 0.05 μM  | 0.05 μM  | 0.05 μM | 0.05 μM  | 0.05 μM  |
| FA values in melanoma cells treated with the association of: | AZD6244 (0.05 μM) | 0.05 μM                                                      | 0.05 μM  | 0.05 μM  | 0.05 μM | 0.05 μM  | 0.05 μM  | 0.05 μM | 0.05 μM  | 0.05 μM  |
|                                                              | BEZ235 (0.005 μM) | 0.005 μM                                                     | 0.005 μM | 0.005 μM | 0.01 μM | 0.01 μM  | 0.01 μM  | 0.02 μM | 0.02 μM  | 0.02 μM  |
|                                                              |                   | 5 ng/mL                                                      | 10 ng/mL | 25 ng/mL | 5 ng/mL | 10 ng/mL | 25 ng/mL | 5 ng/mL | 10 ng/mL | 25 ng/mL |
|                                                              |                   | ns                                                           | ns       | ***      | ns      | ns       | ***      | ns      | ns       | ***      |
|                                                              | AZD6244 (0.05 μM) |                                                              |          |          |         |          |          |         |          |          |
|                                                              | BEZ235 (0.01 μM)  |                                                              |          |          |         |          |          |         |          |          |
|                                                              | AZD6244 (0.05 μM) |                                                              |          |          |         |          |          |         |          |          |
|                                                              | BEZ235 (0.02 μM)  |                                                              |          |          |         |          |          |         |          |          |

The analysis, carried out by ANOVA followed by SNK test, is based on FA data generated by Compusyn software on a dataset of the 21 melanoma cell lines (shown in Fig. 2, Figure S5 and S6) and treated with the indicated combinations of target-specific inhibitors and TRAIL.

\*: p<0.05; \*\*: p<0.01; \*\*\*: p<0.001



|                                                |                                                |          |           |        |                                                                                                                                                                                                                                                                                                                                                                                                                                                                                                                                                                                                                                                                                                                                                                                                                                                                                                                                                                                                                                                                                                                                                                                                                                                                                                                                                                                                                                                                                                                                                                                                                                                                                                                                                                                                                                                                                           |     |     |
|------------------------------------------------|------------------------------------------------|----------|-----------|--------|-------------------------------------------------------------------------------------------------------------------------------------------------------------------------------------------------------------------------------------------------------------------------------------------------------------------------------------------------------------------------------------------------------------------------------------------------------------------------------------------------------------------------------------------------------------------------------------------------------------------------------------------------------------------------------------------------------------------------------------------------------------------------------------------------------------------------------------------------------------------------------------------------------------------------------------------------------------------------------------------------------------------------------------------------------------------------------------------------------------------------------------------------------------------------------------------------------------------------------------------------------------------------------------------------------------------------------------------------------------------------------------------------------------------------------------------------------------------------------------------------------------------------------------------------------------------------------------------------------------------------------------------------------------------------------------------------------------------------------------------------------------------------------------------------------------------------------------------------------------------------------------------|-----|-----|
| Cardiovascular System Development and Function | cell movement of endothelial cells             | 6.63E-04 | Decreased | -2.815 | ACP1, ADAMTS1, ADM, AKT1, ANGPTL4, ANXA2, ARHGAP24, CD151, CD36, CDKN1B, CEACAM1, CSPG4, CXCR4, CYR61, EFNA1, ENG, ENPP2, FGF13, FGF2, FN1, FOXO3, GRN, HAS3, HEY1, HIF1A, HLX, HMMR, HSPAS, ID1, IGFBP3, IL1B, IL8, ITGA3, ITGA4, KLF2, MAP2K1, MAP2K3, MAP2K5, MARCKS, NRP1, PIM1, PRKCC, PTEN, PTGS2, RGCC, RTN4, SDC4, SP100, SPRY4, STC1, TGFB2, THBS1, THBS2, TIMP3, TNFRSF12A, VEGFA, WARS                                                                                                                                                                                                                                                                                                                                                                                                                                                                                                                                                                                                                                                                                                                                                                                                                                                                                                                                                                                                                                                                                                                                                                                                                                                                                                                                                                                                                                                                                         | 57  | yes |
| Cell Cycle                                     | cell cycle progression of tumor cell lines     | 7.70E-04 | Decreased | -2.320 | ABL1, AHR, AKT1, APBB3, BCL6, BIRC5, CCND1, CCND3, CCNE1, CCNG2, CD44, CDC25B, CDC25C, CDK6, CDKN1B, CDKN2C, CEPBP, CHUK, CSNK2A2, DIABLO, DUSP1, EGR1, FOXO3, FRMD6, HBEFG, HIF1A, HPGD, IER3, IGFBP3, IL6, KRAS, LIF, LYN, MAFB, NOTCH1, PHF, PTEN, RASSF1, SLC11A1, SRSF2, XBP1                                                                                                                                                                                                                                                                                                                                                                                                                                                                                                                                                                                                                                                                                                                                                                                                                                                                                                                                                                                                                                                                                                                                                                                                                                                                                                                                                                                                                                                                                                                                                                                                        | 41  | yes |
| Post-Translational Modification                | activation of protein                          | 8.42E-04 | Decreased | -2.195 | ADM, AKT1, AMD1, BBC3, BID, CCNE1, FAFB5, FGF2, IGFBP3, IL1B, IL6, KIT, LIF, ODC1, PMAIP1, PTEN, SPHK1, VEGFA                                                                                                                                                                                                                                                                                                                                                                                                                                                                                                                                                                                                                                                                                                                                                                                                                                                                                                                                                                                                                                                                                                                                                                                                                                                                                                                                                                                                                                                                                                                                                                                                                                                                                                                                                                             | 18  | no  |
| Cancer                                         | mammary tumor                                  | 8.79E-04 | Decreased | -2.430 | ABL1, ACTA2, ADAMTS1, AGPAT6, AKAP12, AKT1, ALDH1A3, ALYREF, ANAPC13, ANG, ARHGAP19, ARHGADIA, ARHGGEF2, ARNTL, ARRB1, ATF3, ATM, BEX1, BEX2, BHLHE40, BIRC5, C14orf159, C1QB, CALM1 (includes others), CCNB2, CCND1, CCNE1, CCNE2, CD44, CDC25B, CDKN1B, CDT1, CEPBP, CEPBD, CENPA, CHD7, CHUK, CLDN1, CLTCL1, COL4A3BP, COFS2, CTDSPL, CTLA4, CTNNB1, CYR61, DDIT4, DUSP1, EGLN1, EGR1, EIF1, EIF5, ELOVL6, ENG, EPOR, ER12, FAM107B, FAM198B, FAM49B, FAM72D, FASN, FBXO4, FBXW4, FBXW7, FEN1, FN1, FOXO3, FSTL3, FURIN, GADD45A, GRN, H3F3A/H3F3B, HBEFG, HBP1, HEY2, HIF1A, HK2, HMMR, HNRNP1A, HSPAS, HSPB8, IDH3A, IER3, IGFBP3, IGFBP5, IL12A, IL6, INO4, JUND, KIT, KLF10, KLF11, KLF6, KRAS, LETMD1, LIMA1, MCL1, MCM10, MET, MKKS, MTF1, MTG1, MT2A, MUC11, MDM1, MYBP1A, MYBP2, MYLK, NEK2, NME1, NOL12, NOP16, NOTCH1, NOTCH2, NQO1, NUP93, ODC1, PAK1IP1, PKA4, PHB, PKDX12, PMAIP1, PPF1A, PRAME, PRM1, PSM12, PTEN, PTGS2, PTPN1, PTPRE, QKI, RAD23B, RANBP1, RASSF1, RBM4B, RGS2, NPL6, RPS24, RRP12, RUNX1, SAFB2, SCHP1, SDC1, SIRT2, SKP2, SLC27A1, SLC2A1, SLC9A3R1, SNAO3, SNAI2, SQA, SRP19, SRPK1, SSPN, SV2A, TAF1D, TGFA, TGFB2, THBS1, TP52, TUBB2A, TUBB4B, TUBG1, UBE2C, UBE2G2, UHRF1, VEGFA, WNT1R1, XRCC3, YPEL5, ZBTB20, ZNF318, ZNF703, ZYX                                                                                                                                                                                                                                                                                                                                                                                                                                                                                                                                                                                                             | 173 | yes |
| Cell Death and Survival                        | neuronal cell death                            | 9.93E-04 | Decreased | -2.015 | ABL1, ADRBK1, AGRN, AKT1, ATF3, ATM, ATXN3, BAG5, BBC3, BID, BIRC5, BNP3, CD200, CDC25A, CDK6, CDKN1B, CHUK, CTNNB1, CTSL2, DDIT3, DIABLO, DNAJB2, DUSP1, DUSP6, E2F3, E2F4, EGLN1, EGR1, EHD4, EPOR, ETS2, FAIM, FBXW7, FGF2, FN1, FOXO3, FZD2, GAB2, GCLM, GDF15, HBEFG, HIF1A, HIPK2, HMG2, HK2, HMB2, HRK, HSPAS, HSPH1, ID2, IDE, IGFBP3, IL1B, IL6, ITGA5, KLF6, KRAS, LDHA, LIF, MAP2K1, MAP2K3, MAP3K12, MAP3K5, MBP, MEF2C, MEF2D, MET, MXD3, NCS1, NQO1, NR1H2, NR2F1, PEX11B, PHB, PLAT, PLP1, PPARC2A, PRNP, PSME3, PTEN, PTGS2, RASD2, RGS10, RNF19A, RUNX1, SH3RF1, SIAH1, SLC2A1, SOX4, SP1, SRPK2, STES1A, STAM, STAMPB, TFB1M, TFDP1, TGFA, TMEM158, TNFRSF1A, TNFRSF21, TRIM2, UBE2V, UCN, VEGFA, WFS1, YWHAB                                                                                                                                                                                                                                                                                                                                                                                                                                                                                                                                                                                                                                                                                                                                                                                                                                                                                                                                                                                                                                                                                                                                                           | 106 | no  |
| Infectious Disease                             | Viral Infection                                | 1.45E-03 | Decreased | -2.495 | ABCE1, ABL1, ABLT1, ACTB, ACTN1, ACTR2, ADRBK1, AFG3L1P, AHCTF1, AHR, AKT1, ALKBH8, ANXA2, AP1B1, APOBEC3F, ARNTL, ARRB1, ASXL2, ATF4, ATM, ATP6V0A4, BBC3, BCL9, BICD2, C15orf52, C1R, C1S, C20orf24, C3AR1, C4orf33, C6orf48, CALOCO1, CAPN3, CBLB, CD200, CD44, CDKN1B, CEPBD, CHD1, CHMP1B, CHORDC1, CHST6, CHUK, CLTCL1, CNST, COASY, CTSL2, CXCR4, CYP2U1, DCBLD1, DCLK1, DDIT3, DDX3X, DHRS2, DHX15, DHX3, DHX58, DMAP1, DNAJA1, DNAJB2, DTX3, DUSP1, EGR1, EIF2C2, EIF2S1, EIF4A3, ENO1, EPAS1, EPOR, EP315, ER12, ETS2, EXOSC10, EXOSC3, F12, FN1, FOXF2, FURIN, FXR1, G3BP1, G3BP2, GAB2, GABARAP1, GHR, GP2, GRB2, GRK6, H3F3A/H3F3B, HIST1H2AC, HIST1H2BD, HIST2AA3/HIST2AA4, HLX, HMGCS1, HMG2, HNRPDL, HPGD, HSPAS, HSPB6, HYAL2, IER3, IFB3, IFI2, IFNAR1, IFNAR2, IFNGR1, IL12A, IL1B, IL6, IL8, IMPDH1, IRF4, IRF9, IRS2, ISG20, ISG20L2, ITGA3, ITGA4, ITGA5, ITRK, KLF2, KHDCC2, LAMP2, LEF1, LMK1, LPL, MAP2K1, MAP2K3, MAP2K5, MAP3K12, MAT2A, MED31, MGAT1, MGLL, MND1, MPHOSPH6, MR1, MRFL4, MT2A, MYOF, NCL, NOPS6, NRP1, NTHL1, NUP155, OPTN, OSPL6, OTUD1, P2RX7, PACSIN3, PARGP, PDE3B, PDE7B, PDKX, PDZD8, PGRMC2, PIK3CB, PKD1L2, PLAT, PMM1, POLG, POU3F1, PPARC1A, PPP1R15A, PPP2R2A, PPP2R5E, PPP3R1, PRDM7, PRMT3, PRNP, PRSS5, PSM12, PSM4, PTGS2, PVR, RAB32, RAB3C, RAB9A, RABEPK, RACGAP1, RALB, RANBP1, RAPGEF1, RASSF1, RBM25, RNF144A, RNF150, RTN2, RUNX1, SAFB, SDC1, SEC14L1, SEC61G, SH2B3, SIGMAR1, SLC2A1, SLC2A3, SLC4A7, SLC9A3R1, SMDA3, SNRPA, SNRPA1, SNRPD3, SNRPF, SNX10, SNX6, SON, SOX4, SP100, SPAST, SPCS3, SPEN, SPHK1, SPRY2, SRPK1, SRPK2, SRSF2, SSR1, ST3GAL5, ST6GAL1, STAG3L1, STAT2, STIP1, SYNJ1, TCFL5, TFD2, TFR3, TGFB2, THOC2, TIAM2, TMC6, TMEM181, TNFRSF1A, TRAPPCC8, TRMT6, TRPV2, TUBB2A, TUBB4B, TUBG1, TXNIP, UBE2C, ULK1, VEGFA, VWF, WIPF1, WWP2, XBP1, ZCCHC17, ZEB2, ZNF148, ZNF446, ZNF536, ZNF688, ZYX | 254 | yes |
| DNA Replication, Recombination, and Repair     | quantity of centrosome                         | 1.67E-03 | Decreased | -2.491 | CDC25B, CHMP1B, GADD45A, ID1, KIF23, LATS2, LMO4, MKS1, RASSF1, SKP2, TFDP1, TMEM67                                                                                                                                                                                                                                                                                                                                                                                                                                                                                                                                                                                                                                                                                                                                                                                                                                                                                                                                                                                                                                                                                                                                                                                                                                                                                                                                                                                                                                                                                                                                                                                                                                                                                                                                                                                                       | 12  | yes |
| Cellular Assembly and Organization             | quantity of centrosome                         | 1.67E-03 | Decreased | -2.491 | CDC25B, CHMP1B, GADD45A, ID1, KIF23, LATS2, LMO4, MKS1, RASSF1, SKP2, TFDP1, TMEM67                                                                                                                                                                                                                                                                                                                                                                                                                                                                                                                                                                                                                                                                                                                                                                                                                                                                                                                                                                                                                                                                                                                                                                                                                                                                                                                                                                                                                                                                                                                                                                                                                                                                                                                                                                                                       | 12  | no  |
| Cellular Development                           | proliferation of ovarian cancer cell lines     | 1.79E-03 | Decreased | -2.143 | AKT1, ARHGGEF2, ATF3, CCND1, CD44, CXCR4, DAB2, E2F3, FOSL1, FOXO3, GDF15, GRN, HAS2, HAS3, HBEFG, IL6, KLF2, NUMA1, SERTAD1, SKP2, TGFA, TGFB2                                                                                                                                                                                                                                                                                                                                                                                                                                                                                                                                                                                                                                                                                                                                                                                                                                                                                                                                                                                                                                                                                                                                                                                                                                                                                                                                                                                                                                                                                                                                                                                                                                                                                                                                           | 22  | yes |
| Cellular Growth and Proliferation              | proliferation of ovarian cancer cell lines     | 1.79E-03 | Decreased | -2.143 | AKT1, ARHGGEF2, ATF3, CCND1, CD44, CXCR4, DAB2, E2F3, FOSL1, FOXO3, GDF15, GRN, HAS2, HAS3, HBEFG, IL6, KLF2, NUMA1, SERTAD1, SKP2, TGFA, TGFB2                                                                                                                                                                                                                                                                                                                                                                                                                                                                                                                                                                                                                                                                                                                                                                                                                                                                                                                                                                                                                                                                                                                                                                                                                                                                                                                                                                                                                                                                                                                                                                                                                                                                                                                                           | 22  | yes |
| Developmental Disorder                         | hypoplasia of organ                            | 1.80E-03 | Increased | 2.376  | ABL1, ADRBK1, AHR, AKT1, ALDH1A3, ARHGADIA, ARID5B, ARRB1, ATF4, BAG3, BCL6, CBY1, CCND3, CCNE1, CCNE2, CDK6, CDKN1B, CTLA4, DHCR7, E2F3, E2F4, ECE2, EPOR, ETS1, FGF2, FGFRL1, GAS1, HBEFG, HLX, IFNGR1, ITGA3, KRAS, LIF, LYN, MAFF, MAP2K1, MET, NFAT5, NKX2-5, NKX3-1, NKX3-2, NOTCH2, PKNX1, PRRX1, PSMC3IP, RASSF2, RDH10, RUNX1, SLC20A1, SMDA3, SOX4, SPEN, TDG, VEGFA, WIPF1, XBP1                                                                                                                                                                                                                                                                                                                                                                                                                                                                                                                                                                                                                                                                                                                                                                                                                                                                                                                                                                                                                                                                                                                                                                                                                                                                                                                                                                                                                                                                                               | 56  | no  |
| Cancer                                         | bone marrow cancer                             | 2.53E-03 | Increased | 2.200  | ABL1, ACTG1, AH1, AKT1, ARID4B, ARID5B, ATM, BCL6, BCOR, BIRC5, C12orf5, CBFB, CCND1, CDC25A, CHUK, CTNNB1, DLEU1, DLEU2, DNMI1, E2F3, E2F4, ENO1, EPOR, FAIM3, FBXL2, FBXW7, FOXO3, GHR, HLX, HSPA1A/HSPA1B, ID4, IFNAR1, IFNAR2, IL1B, IL6, IL8, IMPDH1, IRF4, ITGA3, ITGA4, ITGA5, KIT, KRAS, LDHA, LYN, MSMO1, NOTCH1, NQO1, PDE3B, PDE7B, PDE9A, PPA1, PRIM1, PTEN, RBM15, RPL6, RPS24, RUNX1, RXRB, SNRPD3, SOX4, SRSF2, TUBB2A, TUBB4B, TUBG1, UZAF1, XRCC3                                                                                                                                                                                                                                                                                                                                                                                                                                                                                                                                                                                                                                                                                                                                                                                                                                                                                                                                                                                                                                                                                                                                                                                                                                                                                                                                                                                                                        | 67  | no  |
| Hematologic Disease                            | bone marrow cancer                             | 2.53E-03 | Increased | 2.200  | ABL1, ACTG1, AH1, AKT1, ARID4B, ARID5B, ATM, BCL6, BCOR, BIRC5, C12orf5, CBFB, CCND1, CDC25A, CHUK, CTNNB1, DLEU1, DLEU2, DNMI1, E2F3, E2F4, ENO1, EPOR, FAIM3, FBXL2, FBXW7, FOXO3, GHR, HLX, HSPA1A/HSPA1B, ID4, IFNAR1, IFNAR2, IL1B, IL6, IL8, IMPDH1, IRF4, ITGA3, ITGA4, ITGA5, KIT, KRAS, LDHA, LYN, MSMO1, NOTCH1, NQO1, PDE3B, PDE7B, PDE9A, PPA1, PRIM1, PTEN, RBM15, RPL6, RPS24, RUNX1, RXRB, SNRPD3, SOX4, SRSF2, TUBB2A, TUBB4B, TUBG1, UZAF1, XRCC3                                                                                                                                                                                                                                                                                                                                                                                                                                                                                                                                                                                                                                                                                                                                                                                                                                                                                                                                                                                                                                                                                                                                                                                                                                                                                                                                                                                                                        | 67  | no  |
| Cell Cycle                                     | S phase of fibroblast cell lines               | 2.56E-03 | Decreased | -3.130 | ABL1, BID, CCND1, CCNE1, CDC25A, CDKN1B, DDX3X, E2F3, E2F4, GADD45A, GAS1, SKP2, TFDP1                                                                                                                                                                                                                                                                                                                                                                                                                                                                                                                                                                                                                                                                                                                                                                                                                                                                                                                                                                                                                                                                                                                                                                                                                                                                                                                                                                                                                                                                                                                                                                                                                                                                                                                                                                                                    | 13  | yes |
| Connective Tissue Development and Function     | S phase of fibroblast cell lines               | 2.56E-03 | Decreased | -3.130 | ABL1, BID, CCND1, CCNE1, CDC25A, CDKN1B, DDX3X, E2F3, E2F4, GADD45A, GAS1, SKP2, TFDP1                                                                                                                                                                                                                                                                                                                                                                                                                                                                                                                                                                                                                                                                                                                                                                                                                                                                                                                                                                                                                                                                                                                                                                                                                                                                                                                                                                                                                                                                                                                                                                                                                                                                                                                                                                                                    | 13  | yes |
| Gene Expression                                | expression of gene                             | 2.69E-03 | Increased | 2.032  | ANK3, ARID4B, CD44, CITED1, CITED2, CTNNB1, FGF2, HINFP, ID2, IL1B, IL6, ITGA3, KIT, LEF1, MEF2C, MET, NKX2-6, PLP1, PLSCR1, POU3F1, QKI, RBM4B, SPRY2, SRPK2, TFAP2A, TLE1, VEGFA                                                                                                                                                                                                                                                                                                                                                                                                                                                                                                                                                                                                                                                                                                                                                                                                                                                                                                                                                                                                                                                                                                                                                                                                                                                                                                                                                                                                                                                                                                                                                                                                                                                                                                        | 27  | no  |
| Cellular Movement                              | migration of endothelial cells                 | 2.72E-03 | Decreased | -2.282 | ACP1, ADAMTS1, ADM, AKT1, ANGPTL4, ANXA2, ARHGAP24, CD151, CDKN1B, CYR61, EFNA1, ENG, FGF13, FGF2, FN1, FOXO3, GRN, HAS3, HEY1, HIF1A, HLX, HMMR, HSPAS, ID1, IGFBP3, IL1B, IL8, ITGA3, ITGA4, KLF2, MAP2K1, MAP2K3, MARCKS, NRP1, PIM1, PRKCC, PTEN, PTGS2, RGCC, RTN4, SDC4, SP100, SPRY4, STC1, TGFB2, THBS1, TIMP3, TNFRSF12A, VEGFA, WARS                                                                                                                                                                                                                                                                                                                                                                                                                                                                                                                                                                                                                                                                                                                                                                                                                                                                                                                                                                                                                                                                                                                                                                                                                                                                                                                                                                                                                                                                                                                                            | 50  | yes |
| Cardiovascular System Development and Function | migration of endothelial cells                 | 2.72E-03 | Decreased | -2.282 | ACP1, ADAMTS1, ADM, AKT1, ANGPTL4, ANXA2, ARHGAP24, CD151, CDKN1B, CYR61, EFNA1, ENG, FGF13, FGF2, FN1, FOXO3, GRN, HAS3, HEY1, HIF1A, HLX, HMMR, HSPAS, ID1, IGFBP3, IL1B, IL8, ITGA3, ITGA4, KLF2, MAP2K1, MAP2K3, MARCKS, NRP1, PIM1, PRKCC, PTEN, PTGS2, RGCC, RTN4, SDC4, SP100, SPRY4, STC1, TGFB2, THBS1, TIMP3, TNFRSF12A, VEGFA, WARS                                                                                                                                                                                                                                                                                                                                                                                                                                                                                                                                                                                                                                                                                                                                                                                                                                                                                                                                                                                                                                                                                                                                                                                                                                                                                                                                                                                                                                                                                                                                            | 50  | yes |
| Cellular Growth and Proliferation              | proliferation of epithelial cells              | 2.80E-03 | Decreased | -3.131 | AKT1, ASIP, BMPR1A, CCND1, CCND3, CCNG2, CDC25A, CDC25B, CDK6, CDKN1B, CDKN2C, CEPBP, CHUK, CTNNB1, CTSL2, DLX5, EDRN8, EFNA1, FGF2, FGF3, FN1, FOXF2, GAB2, GAS1, GDF15, GRN, HBEFG, ID1, ID2, IGFBP4, IL1B, IL6, IL8, ITGA3, JUP, KIT, KLF10, KRAS, LTBR, MAP2K1, MAP2K5, MAST1, NFB, NKX3-1, NME1, NOTCH1, PAX3, POU3F2, PPAR, PTEN, PTGS2, PTK6, RRAS, RUNX1, SKP2                                                                                                                                                                                                                                                                                                                                                                                                                                                                                                                                                                                                                                                                                                                                                                                                                                                                                                                                                                                                                                                                                                                                                                                                                                                                                                                                                                                                                                                                                                                    | 64  | yes |
| Cancer                                         | hyperplasia of breast                          | 2.97E-03 | Decreased | -2.170 | CCND1, CDC25B, CDKN2C, CEPBP, CSNK2A2, CTNNB1, ING4, PTGS2, PTPRE, SDC1, TGFA                                                                                                                                                                                                                                                                                                                                                                                                                                                                                                                                                                                                                                                                                                                                                                                                                                                                                                                                                                                                                                                                                                                                                                                                                                                                                                                                                                                                                                                                                                                                                                                                                                                                                                                                                                                                             | 11  | yes |
| Cell Cycle                                     | entry into interphase of fibroblast cell lines | 3.33E-03 | Decreased | -2.449 | ABL1, AKT1, CCND1, CDC25A, DDX3X, E2F3, GAS1, SKP2                                                                                                                                                                                                                                                                                                                                                                                                                                                                                                                                                                                                                                                                                                                                                                                                                                                                                                                                                                                                                                                                                                                                                                                                                                                                                                                                                                                                                                                                                                                                                                                                                                                                                                                                                                                                                                        | 8   | yes |
| Cancer                                         | hyperplasia of exocrine gland                  | 3.33E-03 | Decreased | -2.135 | CCND1, CDKN2C, CSNK2A2, CTNNB1, CTSL2, PTGS2, PTPRE, SDC1                                                                                                                                                                                                                                                                                                                                                                                                                                                                                                                                                                                                                                                                                                                                                                                                                                                                                                                                                                                                                                                                                                                                                                                                                                                                                                                                                                                                                                                                                                                                                                                                                                                                                                                                                                                                                                 | 8   | no  |















|                                         |                                      |          |           |        |                                                                                                                                                                                                                                                                                                                                                                                                                                                                                                                                                                                                                                                                                                                                                                                                                                                                                                                                                                                                                                                                                                                                                                                                                                                                                                                                                                                                     |     |     |
|-----------------------------------------|--------------------------------------|----------|-----------|--------|-----------------------------------------------------------------------------------------------------------------------------------------------------------------------------------------------------------------------------------------------------------------------------------------------------------------------------------------------------------------------------------------------------------------------------------------------------------------------------------------------------------------------------------------------------------------------------------------------------------------------------------------------------------------------------------------------------------------------------------------------------------------------------------------------------------------------------------------------------------------------------------------------------------------------------------------------------------------------------------------------------------------------------------------------------------------------------------------------------------------------------------------------------------------------------------------------------------------------------------------------------------------------------------------------------------------------------------------------------------------------------------------------------|-----|-----|
| Tumor Morphology                        | proliferation of tumor cells         | 3.45E-06 | Decreased | -2.086 | ABL1, ADRBK1, AFAP1L2, ANXA2, ATM, ATP2A2, BAX, BCAN, BCL2, BECN1, BIRC5, BMI1, CASP1, CAV1, CCND1, CDC25A, CDK5, CDK6, CDKN1A, CDKN1B, CDKN2C, CXCR4, DCC, DDIT3, DGC8, DICER1, DKK1, DUSP1, DVL2, EFNA1, EGRI, EPHA2, F2R, FZRL1, FAS, FASN, FGF2, FOS, FOSL1, FOXM1, FOXO3, FST, GDF15, GREB1, HBEGF, HDAC6, HIF1A, HMGGA2, HMGCRC, HMHR, HMOX1, ID1, ID2, ID3, IGFBP3, IGFBP5, IL12A, IL1B, IL8, KDR, KIT, KRAS, LZTS1, LZTS2, MAP2K1, MAP2K3, MAP2K5, MAP2K6, MCAM, MMP9, MST1, MYB, MYC, NFKBIA, NKX3-1, NOV, NOX4, NR4A2, NRP1, PLAT, PLAUR, POU3F2, PPP1R13L, PRKCE, PTEN, PTGS2, PTPRA, PTPRE, RAR, RCAN1, RUVBL1, RXRA, SEC14L2, SEMA4D, SFRP1, SLC3A2, SMO, SNAI2, SPHK1, SPP1, SRC, SSTR2, TAX1BP3, TCF7L2, TFF3, TGFA, TGFBR2, THBS1, TIAM2, TIMP2, TIMP3, TLE1, TNFSF10, TNFSF13B, TP53BP1, TPDS2, TWIST1, TXNIP, USP10, VCAN, VEGFA, XBP1, ZMAT3                                                                                                                                                                                                                                                                                                                                                                                                                                                                                                                                     | 123 | yes |
| Cellular Movement                       | invasion of breast cancer cell lines | 7.83E-06 | Decreased | -2.049 | ABL1, ABL2, ACSL4, ADAMT1S, ATP6V0A4, BCAR3, BHLHE41, CALR, CAV1, CBL, CCNA2, CDKN1B, CTSK, CXCR4, DIAPH2, DIAPH3, FAS, FGF2, FHOD1, FURIN, HAS2, HBP1, HIF1A, HMHR, ID1, ID2, IRS2, ITGB3, JUN, LIMK1, LOX, MCAM, MMP9, MST1, NAMPT, NFKBIA, PAK4, PARVB, PLAUR, PPM1F, PTGS2, PTK2, RNF144A, RUVBL1, SIM2, SP100, SPP1, SRC, STMN1, TFAP2A, TFAP2C, TGFBR2, TNFSF10, TWIST1, WWTR1, ZEB2                                                                                                                                                                                                                                                                                                                                                                                                                                                                                                                                                                                                                                                                                                                                                                                                                                                                                                                                                                                                          | 56  | yes |
| Cancer                                  | pulmonary adenoma                    | 1.04E-03 | Decreased | -2.041 | BECN1, CDKN1B, CDKN2C, FOXM1, FOXO3, FOXO4, LZTS1, MYC, NUDT1, SSBP2, XPC                                                                                                                                                                                                                                                                                                                                                                                                                                                                                                                                                                                                                                                                                                                                                                                                                                                                                                                                                                                                                                                                                                                                                                                                                                                                                                                           | 11  | no  |
| Respiratory Disease                     | pulmonary adenoma                    | 1.04E-03 | Decreased | -2.041 | BECN1, CDKN1B, CDKN2C, FOXM1, FOXO3, FOXO4, LZTS1, MYC, NUDT1, SSBP2, XPC                                                                                                                                                                                                                                                                                                                                                                                                                                                                                                                                                                                                                                                                                                                                                                                                                                                                                                                                                                                                                                                                                                                                                                                                                                                                                                                           | 11  | no  |
| Cancer                                  | tumorigenesis of malignant tumor     | 5.73E-06 | Decreased | -2.032 | AFI1, AHR, ANK3, ASK2, ATM, ATP2A2, AURKB, BCL2, BECN1, BIN3, BIRC5, BMF, BRCA1, CABLES1, CCND1, CDKN1A, CDKN1B, CDKN2C, CTLA4, DCBLD2, DCC, DDB2, DKC1, DTNA, E2F2, EGRI, ERF1, FEN1, FGF2, FNDC3B, FOS, FOXM1, GDF15, GIL2, GSTM1, H2AFX, HIP1, HMGGA2, ID1, IFNAR1, IFNAR2, IGFBP3, IL1B, ING1, ING2, JARID2, JUN, KIF11, KRAS, LTR, LZTS1, MCL1, MTIE, MXI1, MYB, MYC, NFIA, NFKBIA, NQO1, NUDT1, PIM2, PLAUR, PMS2, PROX1, PRICKLE2, PRKARIA, PRKCE, PTEN, PTGS2, PTPRE, ROCK2, RUNX1, RUNX3, SIRT2, SPHK1, SRC, SSBP2, STAT2, TGFBR2, THBS1, TNFSF10, TP53BP1, TPR, TRIM24, VEGFA, XPC, ZEB2                                                                                                                                                                                                                                                                                                                                                                                                                                                                                                                                                                                                                                                                                                                                                                                                  | 87  | no  |
| Tissue Development                      | myelination of nervous               | 3.22E-04 | Decreased | -2.031 | ADAM19, BDNF, DICER1, EGR2, FYN, GJB1, IL11RA, IL1B, LAMC1, MAL, MBP, MYO5A, P2RX7, PMP22, POU3F1, PTPRE, RTN4                                                                                                                                                                                                                                                                                                                                                                                                                                                                                                                                                                                                                                                                                                                                                                                                                                                                                                                                                                                                                                                                                                                                                                                                                                                                                      | 17  | no  |
| Nervous System Development and Function | myelination of nervous tissue        | 3.22E-04 | Decreased | -2.031 | ADAM19, BDNF, DICER1, EGR2, FYN, GJB1, IL11RA, IL1B, LAMC1, MAL, MBP, MYO5A, P2RX7, PMP22, POU3F1, PTPRE, RTN4                                                                                                                                                                                                                                                                                                                                                                                                                                                                                                                                                                                                                                                                                                                                                                                                                                                                                                                                                                                                                                                                                                                                                                                                                                                                                      | 17  | no  |
| Cellular Assembly and Organization      | formation of actin stress fibers     | 5.41E-05 | Decreased | -2.027 | ABL2, AKAP13, ARAP1, ARHGAP18, ARHGEF1, ARHGEF11, ARHGEF17, ARHGEF2, ARHGEF3, BOP1, C3AR1, CAV1, CDKN1A, CHRM1, CNTNAP1, CTGF, DAB2, DIAPH3, F2R, FGF2, FHOD1, FYN, GNA12, GNA13, GNG12, HAX1, HDAC6, IL8, KANK2, KDR, KLF2, KRAS, LIMK1, LMCD1, LPAR1, MAP2K1, MCF2L, MYLK, NCKIPSD, NOX4, PAK4, PLAT, PPM1F, PRKCE, PTK2, PTPRA, RND3, ROCK1, ROCK2, SDC4, SEMA4D, SORBS1, SORBS3, SPRY2, SRC, STARD13, TNC, TNS3, VASP, VEGFA, ZYX                                                                                                                                                                                                                                                                                                                                                                                                                                                                                                                                                                                                                                                                                                                                                                                                                                                                                                                                                               | 61  | no  |
| Cellular Function and Maintenance       | formation of actin stress fibers     | 5.41E-05 | Decreased | -2.027 | ABL2, AKAP13, ARAP1, ARHGAP18, ARHGEF1, ARHGEF11, ARHGEF17, ARHGEF2, ARHGEF3, BOP1, C3AR1, CAV1, CDKN1A, CHRM1, CNTNAP1, CTGF, DAB2, DIAPH3, F2R, FGF2, FHOD1, FYN, GNA12, GNA13, GNG12, HAX1, HDAC6, IL8, KANK2, KDR, KLF2, KRAS, LIMK1, LMCD1, LPAR1, MAP2K1, MCF2L, MYLK, NCKIPSD, NOX4, PAK4, PLAT, PPM1F, PRKCE, PTK2, PTPRA, RND3, ROCK1, ROCK2, SDC4, SEMA4D, SORBS1, SORBS3, SPRY2, SRC, STARD13, TNC, TNS3, VASP, VEGFA, ZYX                                                                                                                                                                                                                                                                                                                                                                                                                                                                                                                                                                                                                                                                                                                                                                                                                                                                                                                                                               | 61  | yes |
| Tissue Development                      | formation of actin stress fibers     | 5.41E-05 | Decreased | -2.027 | ABL2, AKAP13, ARAP1, ARHGAP18, ARHGEF1, ARHGEF11, ARHGEF17, ARHGEF2, ARHGEF3, BOP1, C3AR1, CAV1, CDKN1A, CHRM1, CNTNAP1, CTGF, DAB2, DIAPH3, F2R, FGF2, FHOD1, FYN, GNA12, GNA13, GNG12, HAX1, HDAC6, IL8, KANK2, KDR, KLF2, KRAS, LIMK1, LMCD1, LPAR1, MAP2K1, MCF2L, MYLK, NCKIPSD, NOX4, PAK4, PLAT, PPM1F, PRKCE, PTK2, PTPRA, RND3, ROCK1, ROCK2, SDC4, SEMA4D, SORBS1, SORBS3, SPRY2, SRC, STARD13, TNC, TNS3, VASP, VEGFA, ZYX                                                                                                                                                                                                                                                                                                                                                                                                                                                                                                                                                                                                                                                                                                                                                                                                                                                                                                                                                               | 61  | yes |
| Cancer                                  | pituitary cancer                     | 6.23E-04 | Decreased | -2.021 | ACTA2, ANXA2, ARHGEF2, BCL3, BDNF, CCNB2, CCND1, CDKN1B, CDKN2C, CEBPD, CHKA, CHRN1, DAPK1, DKC1, E2F3, EGRI, FOXO3, FOXO4, GNB4, HMGAI, HMGAI2, HMGAI3, HMOX1, ID1, LAMB3, MIA, MMP9, NFIB, NR3C1, NRIP1, NUSAP1, PAM16, PTPRM, RAC2, SEMA4D, SOX2, TFAP2A, TGFA, TUBB4A                                                                                                                                                                                                                                                                                                                                                                                                                                                                                                                                                                                                                                                                                                                                                                                                                                                                                                                                                                                                                                                                                                                           | 39  | no  |
| Reproductive System Disease             | pituitary cancer                     | 6.23E-04 | Decreased | -2.021 | ACTA2, ANXA2, ARHGEF2, BCL3, BDNF, CCNB2, CCND1, CDKN1B, CDKN2C, CEBPD, CHKA, CHRN1, DAPK1, DKC1, E2F3, EGRI, FOXO3, FOXO4, GNB4, HMGAI, HMGAI2, HMGAI3, HMOX1, ID1, LAMB3, MIA, MMP9, NFIB, NR3C1, NRIP1, NUSAP1, PAM16, PTPRM, RAC2, SEMA4D, SOX2, TFAP2A, TGFA, TUBB4A                                                                                                                                                                                                                                                                                                                                                                                                                                                                                                                                                                                                                                                                                                                                                                                                                                                                                                                                                                                                                                                                                                                           | 39  | no  |
| Neurological Disease                    | pituitary cancer                     | 6.23E-04 | Decreased | -2.021 | ACTA2, ANXA2, ARHGEF2, BCL3, BDNF, CCNB2, CCND1, CDKN1B, CDKN2C, CEBPD, CHKA, CHRN1, DAPK1, DKC1, E2F3, EGRI, FOXO3, FOXO4, GNB4, HMGAI, HMGAI2, HMGAI3, HMOX1, ID1, LAMB3, MIA, MMP9, NFIB, NR3C1, NRIP1, NUSAP1, PAM16, PTPRM, RAC2, SEMA4D, SOX2, TFAP2A, TGFA, TUBB4A                                                                                                                                                                                                                                                                                                                                                                                                                                                                                                                                                                                                                                                                                                                                                                                                                                                                                                                                                                                                                                                                                                                           | 39  | no  |
| Endocrine System Disorders              | pituitary cancer                     | 6.23E-04 | Decreased | -2.021 | ACTA2, ANXA2, ARHGEF2, BCL3, BDNF, CCNB2, CCND1, CDKN1B, CDKN2C, CEBPD, CHKA, CHRN1, DAPK1, DKC1, E2F3, EGRI, FOXO3, FOXO4, GNB4, HMGAI, HMGAI2, HMGAI3, HMOX1, ID1, LAMB3, MIA, MMP9, NFIB, NR3C1, NRIP1, NUSAP1, PAM16, PTPRM, RAC2, SEMA4D, SOX2, TFAP2A, TGFA, TUBB4A                                                                                                                                                                                                                                                                                                                                                                                                                                                                                                                                                                                                                                                                                                                                                                                                                                                                                                                                                                                                                                                                                                                           | 39  | no  |
| Cellular Movement                       | cell movement of tumor cell lines    | 2.41E-10 | Decreased | -2.006 | ABL1, ACSL4, AFAP1, AKAP11, AKT3, ANGPT2, ANKSA1, ANXA1, ANXA2, AP2M1, ARAP3, ARPC1B, BCAN, BCAR3, BHLHE41, CALR, CAV1, CCL2, CCL20, CD36, CD97, CDC25B, CDK5, CDKN1B, CHN2, KLF, CMTM8, COL4A3BP, CRKL, CTGF, CTS1, CXCL13, CXCR4, DAB2, DBF4, DCBLD2, DEFB4A/DEFB4B, DGCRC6L, DKK3, DNAJB4, E2F5, EFNA1, EGRI, ENPP2, EPHA2, EPOR, ETS1, ETV4, ETV5, F2RL1, FADD, FBXL2, FGF2, FHOD1, FOS, FOSL1, FOXD3, FOXM1, FOXO3, FURIN, FYN, GAB1, GDF15, GEMINS, GNA13, GOLGA2, HAS2, HAS3, HAX1, HBEGF, HDAC6, HIF1A, HIPK2, HMHR, HMOX1, ID1, IGFBP3, IL8, ING4, ITGA6, ITGB3, JUN, KANK1, KDR, KIDINS220, KIT, KLF2, KLF4, KRAS, LAMB3, LIF, LIMK1, LMCD1, LOX, LPAR1, LRIG1, LRPS, LYN, MAP2K1, MAP3K1, MAP3K7, MAP4K4, MCCR1, MCAM, MCF2L, MDK, MERTK, MITF, MMP9, MSN, MST1, MYB, MYO10, NDRG1, NEDD9, NFKBIA, NOV, NRCAM, NREP, NRP1, PA2G4, PGF, PHB, PIK3C2B, PIK3CD, PLAUR, PLCC1, PLGRKT, PLXNA1, PLXNB1, PPP1A1, PPM1F, PREX1, PRKCE, PRKD1, PRNP, PTEN, PTGS2, PTK2, PTP4A2, PTPN12, PTPRM, PTPRZ1, PVR, RAB21, RAB27A, RALA, RALB, RAP1GAP, RARRES1, RGS1, RNF144A, RUNX2, RUVBL1, SCNN1A, SEMA3A, SEMA4D, SH3PX2B, SHC4, SLC16A4, SLC2A1, SNAI2, SNX27, SOD2, SPHK1, SPP1, SPRY2, SRC, SSH1, ST3GALS, ST6GAL1, STARD13, STMN1, SYK, SYNM, TBSA1, TFAP2A, TFAP2C, TGFA, THBS1, THBS2, TIMP2, TLR4, TNC, TNFSF10, TP53BP1, TRIP6, TUBA1C, TWIST1, VASP, VEGFA, VEGFB, VPS28, WASL, WWTR1, ZYX | 197 | yes |

**Table S5. Upstream regulator analysis, by IPA software, of genes significantly modulated by the association of TRAIL with AZD6244**

Results shown here are based on the set of genes identified by areas highlighted in fuchsia in Fig. S8A.

See supplementary methods for the meaning of the p values and of the z score statistics.

| Upstream Regulator | Log Ratio | Molecule Type           | Predicted Activation State | Activation z-score | p-value of overlap | Target molecules in dataset                                                                                                                                                                                                                                                                                                                                                                                                                                                                                                                                                                                                                                                                                                                                                                                                                                                                                                                                                                                                                                                                                                                                                                                                                                                                                                                                                                                                                                                                                                                                                                                                                                                                                                                                                                                                                                                                                                                                                                                                                                                                                                                                                                                                                                                                                                                                                                                                                                                                                                                                                                                                                                                                                    |
|--------------------|-----------|-------------------------|----------------------------|--------------------|--------------------|----------------------------------------------------------------------------------------------------------------------------------------------------------------------------------------------------------------------------------------------------------------------------------------------------------------------------------------------------------------------------------------------------------------------------------------------------------------------------------------------------------------------------------------------------------------------------------------------------------------------------------------------------------------------------------------------------------------------------------------------------------------------------------------------------------------------------------------------------------------------------------------------------------------------------------------------------------------------------------------------------------------------------------------------------------------------------------------------------------------------------------------------------------------------------------------------------------------------------------------------------------------------------------------------------------------------------------------------------------------------------------------------------------------------------------------------------------------------------------------------------------------------------------------------------------------------------------------------------------------------------------------------------------------------------------------------------------------------------------------------------------------------------------------------------------------------------------------------------------------------------------------------------------------------------------------------------------------------------------------------------------------------------------------------------------------------------------------------------------------------------------------------------------------------------------------------------------------------------------------------------------------------------------------------------------------------------------------------------------------------------------------------------------------------------------------------------------------------------------------------------------------------------------------------------------------------------------------------------------------------------------------------------------------------------------------------------------------|
| MITF               | 0.442     | transcription regulator | Activated                  | 4.882              | 3.09E-14           | ACO2, APOE, ATP6V1B2, ATP6V1C1, BCL2, BEST1, CA14, CAPN3, CCNG2, CDK5R1, CHKA, CLCN7, CTSK, DAPK1, DSTYK, EDNRB, ESRP1, FAM53B, FOS, GMPR, GREB1, GYG2, HIF1A, HPGD, HPS4, IL8, IRF4, ITGA4, ITPKB, KCNN2, KIAA1598, KIT, MBP, MC1R, MDM1, MICALL1, MITF, MLANA, NR3C1, PHACTR1, PIR, PLA1A, PPM1H, QDPR, RAB27A, SEMA6A, SORT1, SOX6, ST3GAL6, STX7, STXBP1, TBC1D16, TBX2, TFAP2A, TMC6, TMCC2, TRPM1, TXNIP, TYRP1, USP48, VAT1                                                                                                                                                                                                                                                                                                                                                                                                                                                                                                                                                                                                                                                                                                                                                                                                                                                                                                                                                                                                                                                                                                                                                                                                                                                                                                                                                                                                                                                                                                                                                                                                                                                                                                                                                                                                                                                                                                                                                                                                                                                                                                                                                                                                                                                                             |
| HNF4A              |           | transcription regulator | Activated                  | 2.058              | 3.90E-06           | ANKRA2, ANKZF1, APH1A, APOE, ARG2, ARHGFEF19, AS3MT, ATAT1, ATF6B, ATP6V1H, AVPI1, BAZ1A, BCCIP, BMI1, BPGM, BRD8, BSDC1, BTG1, C11orf1, C11orf71, C12orf52, C1orf123, C15, C2, C21orf59, C22orf28, C2orf44, C4orf19, CAV1, CCDC115, CCDC41, CCDC53, CCNA2, CCNG2, CD3EAP, CD55, CDC25A, CDC6, CDK2AP2, CDKS, CDK5RAP3, CDKN1A, CDKN1B, CEBPB, CEBPD, CEP95, CES2, CETN3, CHERP, CHMP1B, CIAO1, CLDN1, CLTCL1, COPS7B, COPS8, CPB2, CRADD, CRIPT, CRKL, CROT, CRYZ, CYP27A1, CYTH2, DBP, DCAF13, DDIX10, DDIX18, DHDD5, DHRS4, DLG4, DNAJB4, DPH5, DSN1, DUSP3, DUSP6, E2F5, EGR1, EIF4G1, EIF5, ELP5, EMC2, EMG1, ENCL1, EPHA2, EPM2AIP1, ERCC5, ERIZ, ERLIN1, ERO1L, EXOSC2, F12, FAM107B, FAM216A, FAM46A, FAS, FEM1B, FEN1, FGF13, FKBP1, FOXO1, FOXRED1, FTSJ1, FURIN, FXVD6, FYCO1, FZD1, G3BP2, GAB1, GALM, GAS1, GDF15, GJB1, GLCE, GNL3, GOLGA2, GPR137, GPR37, GSPT1, GSTA4, GSTK1, GSTO1, GTF2B, GTF2I, GTPBP3, GUSB, HADHB, HBP1, HDAC6, HEXA, HEY1, HIF1A, HIST1H2BD, HIST1H4A, HIST2H2AA3/HIST2H2AA4, HIST2H2BE, HLA-F, HMGGB2, HPS5, HTRA2, IERS, IFNAR1, IFT122, IL11RA, IL1RAP, INCENP, ING4, INTS7, IPO13, ISOC1, ISOC2, ITGA6, JUN, KCNN2, KIF20A, KLF15, KLHL20, KRR1, LAMTOR2, LARS2, LDB1, LHX6, LIMS1, LPCAT3, LPGAT1, LRP5, MAP2K5, MAP3K3, MAP3K7, MCEE, MDM1, MED23, MGEA5, MGS1, MICU1, MID1, MINA, MOCOS, MPP1, MRPL3, MRPL32, MRPL44, MRPS12, MRPS18C, MRT04, MSMB, MST1, MT1X, MT2A, MTHFS, MUT, MYC, N4BP2L2, NAMPT, NARS2, NCBP2, NCOA4, NDC80, NDRG1, NDUFB3, NEURL2, NOC3L, NOLC1, NOP16, NR2F1, NR5A2, NUAKE1, NUCB1, NUDT2, NUDT6, NUP54, OTUD6B, PAAF1, PAGR1, PAN2, PARG, PCDH20, PDK4, PELO, PEPD, PEX11B, PEX16, PFKFB4, PHB, PI4KB, PIK3R3, PINK1, PITPNB, PNMA1, PNO1, PNP, POLR1B, POLR1C, POLR3E, POLR3G, PPARGC1A, PPFIBP1, PPL1, PPF1R12B, PPP1R3C, PPP2R3C, PRCP, PRELID2, PRICKLE4, PRKCE, PRMT1, PROM1, PRPF38B, PSAT1, PSMB5, PSMD10, PTGDS, PTK2, PTPRE, QTRTD1, RAB2A, RABEPK, RAP1GAP, RARA, RARB, RBM23, RHPN2, RIOK1, RNASE4, ROCK1, RPS6KC1, RQCD1, RRM1, RTCA, RTFDCL1, RXRA, SAMM50, SAT2, SEC31A, SEMA3C, SEPSECS, SERPINB8, SETDB2, SIRT2, SLC16A6, SLC22A18A5, SLC25A19, SLC25A20, SLC25A40, SLC30A7, SLC38A1, SNAI2, SNAP23, SNAPC1, SNX17, SNX5, SPATA5L1, SPC25, SPP1, SRFBP, SRSF2, SSU72, STAM, STARD10, STIM1, STK19, STK24, STOML1, STX18, SUGL1, SULT1A3/SULT1A4, SYNI2BP, TAOX3, TBC1D15, TBC1D16, TCF7L2, TEX10, TFB1M, TFB2M, TIMM21, TMC6, TMEM140, TMEM187, TMEM278, TMEM87B, TMUB2, TNC, TOM1, TOR2A, TPP2, TPX2, TRAP1, TRAPPC6A, TRIM24, TRIM4, TRMT1L, TRPC4AP, TSPAN14, TTC19, TUBB4A, TUFT1, TXNIP, UBQLN2, UCHL5, UGT2B11, UPF3B, UQCQ, UTP23, VIPAS39, WASL, WDR12, ZC3H10, ZC3H15, ZCCHC9, ZDHHC6, ZFYVE19, ZKSCAN5, ZNF193 |
| KLF2               | -0.211    | transcription regulator | Activated                  | 2.748              | 2.10E-03           | ADM, ANGPT2, BCL3, CCL2, CD55, CDKN1A, CTGF, CXCR4, EFNA1, EPAS1, HIF1A, ID1, ID3, IL1B, IL8, ITGB3, ITGB5, KCNN4, KDR, MAP3K5, MT2A, MYC, NDRG1, NFKBIA, NQO1, PGF, PPAP2B, PTGDS, PTGS2, RALA, RUNX2, SLC2A1, TCF4, THBS1                                                                                                                                                                                                                                                                                                                                                                                                                                                                                                                                                                                                                                                                                                                                                                                                                                                                                                                                                                                                                                                                                                                                                                                                                                                                                                                                                                                                                                                                                                                                                                                                                                                                                                                                                                                                                                                                                                                                                                                                                                                                                                                                                                                                                                                                                                                                                                                                                                                                                    |
| MEOX2              |           | transcription regulator | Activated                  | 2.138              | 2.73E-03           | ANGPT1, CCL2, CCL20, CDKN1A, EFNA1, FGF2, HBEGF, ICAM1, ID1, ID3, IL8, ITGB3, ITGB5                                                                                                                                                                                                                                                                                                                                                                                                                                                                                                                                                                                                                                                                                                                                                                                                                                                                                                                                                                                                                                                                                                                                                                                                                                                                                                                                                                                                                                                                                                                                                                                                                                                                                                                                                                                                                                                                                                                                                                                                                                                                                                                                                                                                                                                                                                                                                                                                                                                                                                                                                                                                                            |
| TFEB               |           | transcription regulator | Activated                  | 2.395              | 2.65E-02           | ATP6V1H, CLCN7, CTSF, HEXA, MCOLN1, SCPEP1, TMEM55B, TYRP1, VEGFA                                                                                                                                                                                                                                                                                                                                                                                                                                                                                                                                                                                                                                                                                                                                                                                                                                                                                                                                                                                                                                                                                                                                                                                                                                                                                                                                                                                                                                                                                                                                                                                                                                                                                                                                                                                                                                                                                                                                                                                                                                                                                                                                                                                                                                                                                                                                                                                                                                                                                                                                                                                                                                              |
| SOX9               |           | transcription regulator | Activated                  | 2.198              | 3.13E-02           | BMI1, CDKN1A, CTGF, CXCR4, FOS, KIT, MIA, MITF, PTGDS, RUNX2, SNAI2, SOX8, TCF7L2, VEGFA                                                                                                                                                                                                                                                                                                                                                                                                                                                                                                                                                                                                                                                                                                                                                                                                                                                                                                                                                                                                                                                                                                                                                                                                                                                                                                                                                                                                                                                                                                                                                                                                                                                                                                                                                                                                                                                                                                                                                                                                                                                                                                                                                                                                                                                                                                                                                                                                                                                                                                                                                                                                                       |
| CIITA              |           | transcription regulator | Activated                  | 2.172              | 7.71E-02           | CCND1, CD74, GCNT2, HLA-DPA1, HLA-DRA, HLA-DRB1, MMP9                                                                                                                                                                                                                                                                                                                                                                                                                                                                                                                                                                                                                                                                                                                                                                                                                                                                                                                                                                                                                                                                                                                                                                                                                                                                                                                                                                                                                                                                                                                                                                                                                                                                                                                                                                                                                                                                                                                                                                                                                                                                                                                                                                                                                                                                                                                                                                                                                                                                                                                                                                                                                                                          |
| FOXA1              |           | transcription regulator | Activated                  | 2.021              | 2.08E-01           | ACTA2, ACTG2, ANXA1, CD58, EFHD1, ELK3, FNDC3B, FSTL1, HK1, LHFP, LYN, MALT1, NR4A2, NRIP1, PRNP, TFF3, TPM2, TRIM2, UGT2B17, XBP1                                                                                                                                                                                                                                                                                                                                                                                                                                                                                                                                                                                                                                                                                                                                                                                                                                                                                                                                                                                                                                                                                                                                                                                                                                                                                                                                                                                                                                                                                                                                                                                                                                                                                                                                                                                                                                                                                                                                                                                                                                                                                                                                                                                                                                                                                                                                                                                                                                                                                                                                                                             |
| MYOCD              |           | transcription regulator | Activated                  | 2.383              | 3.26E-01           | ACTA2, ATP2A2, CDKN1A, FOS, MEFC2, MYLK, VCAN                                                                                                                                                                                                                                                                                                                                                                                                                                                                                                                                                                                                                                                                                                                                                                                                                                                                                                                                                                                                                                                                                                                                                                                                                                                                                                                                                                                                                                                                                                                                                                                                                                                                                                                                                                                                                                                                                                                                                                                                                                                                                                                                                                                                                                                                                                                                                                                                                                                                                                                                                                                                                                                                  |
| IKZF1              |           | transcription regulator | Activated                  | 2.615              | 3.52E-01           | ADAM19, CCND2, CDKN1B, EPOR, FGF13, FGF3, HES1, HNRPL, KIT, LHFP, LHFPL2, MYC, PPP1R9A, PRNP, RAI14, SASH1, SLC27A3                                                                                                                                                                                                                                                                                                                                                                                                                                                                                                                                                                                                                                                                                                                                                                                                                                                                                                                                                                                                                                                                                                                                                                                                                                                                                                                                                                                                                                                                                                                                                                                                                                                                                                                                                                                                                                                                                                                                                                                                                                                                                                                                                                                                                                                                                                                                                                                                                                                                                                                                                                                            |
| GATA6              |           | transcription regulator | Activated                  | 2.069              | 4.62E-01           | ACTA2, CAV1, CDKN1A, DAB2, MEFC2, MYLK, SEMA3C, TNFSF10                                                                                                                                                                                                                                                                                                                                                                                                                                                                                                                                                                                                                                                                                                                                                                                                                                                                                                                                                                                                                                                                                                                                                                                                                                                                                                                                                                                                                                                                                                                                                                                                                                                                                                                                                                                                                                                                                                                                                                                                                                                                                                                                                                                                                                                                                                                                                                                                                                                                                                                                                                                                                                                        |

| Upstream Regulator | Log Ratio | Molecule Type           | Predicted Activation State | Activation z-score | p-value of overlap | Target molecules in dataset                                                                                                                                                                                                                                                                                                                                                                                                                                                                                                                                                                                                                                                                                                                                                                                                                                                                                                                                                                                                                                                                                                                                                                                                                                                                                                                                                                                                                                                                                                                                                                                                                                                                                                                                                                                                                                                                                                                                                                                                                                                                                                                                                                                                                                                                                                                                                                                                                                                                                             |
|--------------------|-----------|-------------------------|----------------------------|--------------------|--------------------|-------------------------------------------------------------------------------------------------------------------------------------------------------------------------------------------------------------------------------------------------------------------------------------------------------------------------------------------------------------------------------------------------------------------------------------------------------------------------------------------------------------------------------------------------------------------------------------------------------------------------------------------------------------------------------------------------------------------------------------------------------------------------------------------------------------------------------------------------------------------------------------------------------------------------------------------------------------------------------------------------------------------------------------------------------------------------------------------------------------------------------------------------------------------------------------------------------------------------------------------------------------------------------------------------------------------------------------------------------------------------------------------------------------------------------------------------------------------------------------------------------------------------------------------------------------------------------------------------------------------------------------------------------------------------------------------------------------------------------------------------------------------------------------------------------------------------------------------------------------------------------------------------------------------------------------------------------------------------------------------------------------------------------------------------------------------------------------------------------------------------------------------------------------------------------------------------------------------------------------------------------------------------------------------------------------------------------------------------------------------------------------------------------------------------------------------------------------------------------------------------------------------------|
| TGFB1              |           | growth factor           | Inhibited                  | -3.235             | 4.82E-20           | ABCA1, ABCC2, ABCD1, ABCE1, ABL1, ACAA2, ACSL3, ACSS1, ACTA2, ACTG2, ACTN1, ACVR1, ADAM19, ADK, ADM, ADORA2B, AHNAC, AHR, AIF1, AIM2, ALDH18A1, AMD1, ANGPT1, ANGPTL4, ANXA2, APOE, AQP11, ARHGFEF19, ARID5B, ARL4A, ASNS, ATM, ATXN1, B3GALT2, BAX, BCL2, BCL2L11, BCL3, BDNF, BECN1, BHLHE40, BIRC5, BMF, BMI1, BMP1, BTG1, C15, C2, C20orf24, CALCOCO2, CALM1, CAMK2G, CASP1, CASP4, CAV1, CCL2, CCL20, CCNA2, CCNB2, CCND1, CCND2, CCNG2, CCR1, CD36, CD55, CD59, CDC25A, CDC25C, CDC42EP4, CDK5R1, CDKN1A, CDKN1B, CDKN2C, CEBPB, CELF2, CENPA, CKS1B, CLCA2, CLIC4, CMTM5, CNH1, COL16A1, CRYGS, CSPG4, CSRP2, CTGF, CTSLA, CTPS1, CTSK, CTK, CXCR4, CYB5E1, DAB2, DAPK1, DDB2, DDIT4, DDX21, DKC1, DKK3, DLL3, DNAJB4, DSP, DUSP1, DUSP4, DYNLL1, DYRK2, EDNRB, EGLN1, EGR1, EGR2, EGR3, EIF4A3, ELK3, EOMES, EPHA2, ERCC5, ESPL1, ESRP1, ETS1, F2R, F2R1L, FABP5, FAM3C, FAM53B, FAS, FCER1G, FGF12, FGF2, FLI1, FNDC3B, FOS, FOXO1, FOXO3, FSTL3, FTH1, FTL, FURIN, FXVD6, FYN, FZD1, FZD2, GALT, GAS1, GBB1, GDF15, GDDP5, GLCE, GLI2, GLRX2, GMPR, GNA13, GN84, GPR19, GPR83, GPRC5A, GUSB, H1FX, HAS2, HAS3, HBEGF, HES1, HEXA, HEY1, HIF1A, HLA-DRB1, HMGGA1, HMGGA2, HMOX1, HNMT, HOXD1, HPGD, HSD17B10, HSPB1, ICAM1, ID1, ID2, ID3, IER3, IFI16, IGFBB3, IGFBB5, IL12A, IL17D, IL18, INGI1, ITGA4, ITGA6, ITGB3, ITGB5, ITPR2, JUN, JUND, KCGN1, KDEL3, KDM5B, KDR, KIAA1199, KIT, KLF15, KLF2, KLF4, KLF9, KRAS, KRT18, LAMB3, LAMC1, LDB1, LIF, LIMS1, LOX, LPCAT3, LPL, MAF, MAP2K1, MAP2K3, MAP3K11, MBNL2, MCM2, MEFC2, MGEA5, MID1, MITF, MMP9, MPP6, MSMB, MSMO1, MSN, MTHFD2, MTRR, MXD3, MXD4, MXI1, MYB, MYC, MYLK, MYO10, NAMPT, NCAPG, NDC80, NEDD9, NEK2, NFIB, NFKBIA, NLRP3, NNMT, NOC3L, NOP58, NOV, NOX4, NPAS2, NR4A2, NRP1, NTSE, NUAKE1, NUPR1, OARD1, OPN3, P4HA1, PA2G4, PAPPA, PDLIM4, PDLIM5, PDXK, PHLDA2, PIK3CD, PINK1, PLA1A, PLAT, PLAU, PLCL1, PMEPA1, PMM1, PNO1, PNP, PPP1R13B, PPP1R3C, PPP2R5A, PRODH, PROM1, PTEN, PTGDS, PTGES, PTGS2, PTK2, RAB6A, RAB9A, RACGAP1, RALB, RARA, RBMS1, RIN1, RUNX1, RUNX2, RUNX3, RXRA, SCPPDH, SDCA, SELENBP1, SEMA3A, SFRP1, SLC16A3, SLC20A1, SLC2A1, SLC2A3, SLC23A14, SLC39A8, SLC7A1, SLC7A5, SMAD6, SMTN, SNAI2, SNTB2, SOD2, SOX4, SPHK1, SPOCK1, SRC, SRI, SRM, SRSF2, SSTR2, ST3GAL5, STC2, TACC2, TAX1BP3, TCN2, TGFA, TGFB2, TGFB3, TGIF1, THBS1, TIMP2, TIMP3, TJP2, TLE4, TLR4, TNC, TNFRSF12A, TNFSF13B, TPM2, TPST2, TRIM2, TRIM9, TSC22D1, TSC22D3, TUBB3, TWIST1, TXNIP, UCK2, UST, VASP, VAT1, VCAN, VDR, VEGFA, |
| MYC                | -1.011    | transcription regulator | Inhibited                  | -2.033             | 1.85E-18           | ABCE1, ACAT1, ACSL4, ACTN1, ADD1, ADK, ADM, AIMP2, AK2, AKAP12, ALDH18A1, AMD1, ANGPT1, ANGPT2, ASNS, AURKB, BAX, BCKDHB, BCL2, BDNF, BIRC5, BMI1, BOP1, BRCA1, CASP1, CAV1, CCNA2, CCNB2, CCND1, CCND2, CCNG2, CDC25B, CDC25C, CDK6, CDKN1A, CDKN1B, CEBPD, CHKA, CHRN1, CLIC4, CLUH, COL15A1, COL5A2, CSDA, CSPG4, CSRP2, DBI, DDB2, DDIT3, DDX18, DDX21, DKC1, DKK1, DUSP1, DUSP6, E2F2, E2F3, EGLN1, EGR2, EIF4A1, EIF4G1, F2R, FABP5, FAM129A, FAP, FAS, FASN, FBN2, FOS, FOSL1, FOXM1, FSTL1, FTH1, GART, GAS1, GCLM, GFPT1, GOLGA2, GRPEL1, GSR, GTF2F2, HAS2, HIF1A, HIST1H4A, HIVEP2, HK2, HMGGA1, HMOX1, HNRNPAB, HNRNP, HSPB1, HSPD1, ICAM1, ID1, ID2, ID3, IER3, IL1RAP, IL8, IMPA2, IRF9, ITGA6, JARID2, KDR, KLF4, KRAS, LAMB3, LGMN, LIMA1, LIMS1, LOX, LXN, MAPKAPK5, MBP, ME2, METAP1, MGAT1, MINA, MITF, MMP9, MNT, MRPL12, MSN, MT1E, MTHFR, MYC, NCL, NDRG1, NOLC1, NOP56, NOP58, NUCB1, NUDC, OAS1, OLIG1, PFAS, PFKFB3, PHB, PHF20, PLA1A, PLAU, PLP1, PMAIP1, PMP22, PNO1, POLR1B, PPAT, PPP1CC, PPP1R15A, PRMT1, PRODH, PSAT1, PTEN, RAB40B, RANBP1, RARA, RARRES1, ROCK1, ROCK2, RPL6, RPL7, RPS7, RRP1B, RRS1, RTN2, RUVBL1, SAT1, SCPEP1, SEBRP1, SFRP1, SFXN1, SLC16A3, SLC1A5, SLC25A19, SLC2A1, SLC2A3, SLC38A1, SLC3A2, SLC7A5, SMHG12, SNRPC, SOD2, SOX2, SOX6, SPP1, SRM, SRSF2, ST3GAL1, ST3GAL4, STMN1, TDP1, TGFB2, THBS1, THBS2, TIMM23, TIMP2, TLE1, TLE4, TNC, TNS3, TP53, TP53, TP52, TP2, TXNIP, UBE2C,                                                                                                                                                                                                                                                                                                                                                                                                                                                                                                                                                                                                                                                                                                                                                                                                                                                                                                                                                                                                                                                                        |



|        |        |                         |           |        |          |                                                                                                                                                                                                                                                                                                                                                                                                                                                                                                                                                                                                                                                                                                                                                                                                                                                                                                                                                                                                                                                 |
|--------|--------|-------------------------|-----------|--------|----------|-------------------------------------------------------------------------------------------------------------------------------------------------------------------------------------------------------------------------------------------------------------------------------------------------------------------------------------------------------------------------------------------------------------------------------------------------------------------------------------------------------------------------------------------------------------------------------------------------------------------------------------------------------------------------------------------------------------------------------------------------------------------------------------------------------------------------------------------------------------------------------------------------------------------------------------------------------------------------------------------------------------------------------------------------|
| FGF2   | -0.341 | growth factor           | Inhibited | -2.373 | 5.36E-08 | ACTA2, AGAP3, ANG, ANGP1, ANGP2, BAX, BCL2, BDNF, BIRC5, CAV1, CCL2, CCND1, CCND2, CDC25A, CDKN1A, CDKN1B, CTSK, CTSL1, CXCR4, DDIT3, EDNRB, EFN2, EGR1, ENPP2, EPAS1, EPOR, ERRF1, ETS1, FAS, FGF2, FGF3, FOS, FOSL1, FOXO1, FOXO3, FOXO4, FTH1, GBP1, HAS2, HBEGF, HIF1A, ICAM1, ID3, IGFBP3, IGFBP5, IL1B, JUN, KDR, KRAS, LOX, MBP, MITF, MMP9, NOV, NR3C1, NR4A2, PLAT, PLAUR, PRKCE, PTGS2, PTPRE, RUNX1, RUNX2, SCG2, SFRP1, SLC20A1, SLC2A1, SPP1, SPRY1, SPRY2, SPRY4, ST3GAL1, ST3GAL4, TGFBR3, THBS1, TIMP3, TNFRSF12A, TNFSF10, TWIST1, UGT2B17, VEGFA, VGF, ZFP57                                                                                                                                                                                                                                                                                                                                                                                                                                                                  |
| BRAF   |        | enzyme                  | Inhibited | -2.218 | 1.20E-07 | BCL2L11, BMF, CCND1, CDKN1A, CDKN1B, CEBPB, DUSP4, EGR1, EPAS1, FOXD3, HIF1A, IL1B, IL8, MMP9, MYC, POU3F2, RND3, THBS1, TSC22D1                                                                                                                                                                                                                                                                                                                                                                                                                                                                                                                                                                                                                                                                                                                                                                                                                                                                                                                |
| EPAS1  | 0.797  | transcription regulator | Inhibited | -2.295 | 2.17E-07 | ACACA, ADM, AKAP12, ANGP2, ANGP4, BHLHE40, BNIP3, CAV1, CCND1, CHKA, CXCR4, DDIT3, FAM13A, FASN, FOS, GAL3ST1, HIF1A, HILPDA, HIST1H2AC, HOXA5, IGFBP3, IGFBP5, IRS2, ITGB3, KDR, KIAA1199, LOX, MAFF, MYOM2, NDRG1, PAN2, PFKFB3, PGF, PLIN2, PTPR21, SLC11A2, SLC16A4, SLC29A1, SLC2A1, SLC2A3, SOD2, SPHK1, STC2, TGFA, TMEM45A, TTP2, UG2, VEGFA, WISP2                                                                                                                                                                                                                                                                                                                                                                                                                                                                                                                                                                                                                                                                                     |
| CSF1   |        | cytokine                | Inhibited | -3.495 | 2.28E-07 | APOE, BAX, BCL2, BCL2L11, BIRC5, CBL, CCL2, CCND1, CCND2, CD97, CDKN1A, CTSK, DUSP1, DUSP5, EGR1, EGR3, ETS2, F2R, F2RL1, FAS, FCER1G, FCGR2A, FOS, GDF15, GRAP2, IL11RA, IL12A, IL1B, IRF4, IRF5, ITGA4, ITGB3, ITGB5, JUN, MAP3K3, MERTK, MMP16, MMP9, MYC, NKIRAS1, RUNX1, SFRP1, SLC29A1, STX3, TNFRSF1A, TNFRSF1B, TRAP, VEGFA                                                                                                                                                                                                                                                                                                                                                                                                                                                                                                                                                                                                                                                                                                             |
| NRG1   |        | growth factor           | Inhibited | -2.902 | 2.66E-07 | ACTN1, ANGP1, ARHGEF2, BCL2, BNIP3, BRCA1, CCND1, CCND2, CDC42EP1, CDKN1A, CDKN1B, CTGF, DDIT3, DNAJB2, DUSP1, DUSP4, DUSP6, EGR1, EGR2, EGR3, EPHA2, ERRF1, FOS, FSTL1, G3BP1, HES1, HIF1A, HK2, HMGA1, HMGR, HMOX1, ID1, IER3, IL8, ITGB3, ITGB5, JUND, LMO4, LPCAT3, MBP, MCL1, MMP9, MST1, MYC, PLAUR, POU3F1, PTGS2, RUNX1, SLC2A1, SLC2A3, SOX4, VEGFA, ZFP36                                                                                                                                                                                                                                                                                                                                                                                                                                                                                                                                                                                                                                                                             |
| OSM    |        | cytokine                | Inhibited | -2.234 | 5.30E-07 | ABCA1, ABCC1, ABCC4, ADAMTS1, AHCYL1, AHR, AMACR, ANGP2, ANXA1, ANXA2, ARHGEF2, ARL4A, ASNS, ATP2B4, ATP9A, BAIAP2, BHLHE40, BMI1, BRD8, C1R, C1S, CASP4, CCL2, CCL20, CCND1, CCND2, CCNG2, CDC42EP4, CDKN1A, CDKN1B, CEBPD, CHD1, CTSH, CTSL1, DAPK1, DEFBA4/DEFB4B, DHRS3, DYRK3, ETS2, EXOSC10, FGF2, FOS, GAB1, GART, GBP1, GFF1, GLE1, GMPR, GOLGA2, HBEGF, HIF1A, HK2, HLA-F, HMG20B, HMOX1, HSF4, HSPA2, ICAM1, ID1, ID2, IL13RA1, IL1B, IL8, IRAK1, IRF9, ISG20, ITPKB, JMJD1C, JUN, KCNG1, MGLL, MLLT11, MMP9, MOAP1, MT1X, MT2A, MYC, NAMPT, NUKA1, OAS1, PDLIM5, PEPD, PFKFB3, PLCB4, PLLP, PPP3CC, PTEN, PTGS2, PTP4A1, PTPR21, QKI, RAP2A, RNASE4, RUNX1, RYK, SERPINB8, SLC16A3, SLC16A6, SMPD1, SON, SORD, SRPK1, ST8SIA1, STK4, TIMP3, TM4SF1, TNC, TOM1, TPX2, TRRAP, TULP3, UAP1, UBLQN2, UPK1A, VDR, VEGFA, ZNF266, ZNF330                                                                                                                                                                                                   |
| TREM1  |        | transmembrane receptor  | Inhibited | -3.706 | 8.72E-07 | ABL2, ACSL3, ADORA2B, ARDC4, ASNS, ATP1B1, BRE, CCL20, CEBPB, CFB, DEFBA4/DEFB4B, DUSP14, DUSP4, EGR1, EGR2, EGR3, EPM2A1P1, ETS2, FAPB3, FOSL1, GCLM, GPRC5A, HBEGF, HES1, IFIT2, IL1B, IL8, KANK1, LIF, LPL, MAFF, MCOLN2, MOAP1, MT1E, NFKBIA, NPC1, NR4A2, NT5E, PHLDA1, PHLDA2, PIM2, PPAP2B, PTGS2, RCAN1, RGS1, RHOBTB3, SNAPC1, SPP1, SPRY2, SYNJ2, TBC1D7, THBS1, TLR4, TMEM158, WBP5, YRDC                                                                                                                                                                                                                                                                                                                                                                                                                                                                                                                                                                                                                                            |
| STAT3  |        | transcription regulator | Inhibited | -2.591 | 1.51E-06 | ADM, ANGP2, ANGP4, ARG2, BATF, BCL2, BCL2L11, BCL3, BIRC5, CASP1, CCL2, CCL20, CCND1, CCND2, CCR1, CD74, CDC25A, CDKN1A, CDKN1B, CEACAM1, CEBPB, CEBPD, CFB, CTSL1, CXCL13, DDIT3, EGR1, EGR2, EGR3, EME1, EPAS1, FAS, FASN, FCER1G, FGF2, FOS, HAS2, HIF1A, HIST2H2AA3/HIST2H2AA4, HK2, HLA-DRB1, HMOX1, ICAM1, ID2, IFI16, IGFBP5, IL1B, IL8, IRF4, ISG20, KDR, KLF4, LIF, LTBR, MAF, MAP2K5, MCL1, MITF, MMP9, MRAS, MT1E, MYB, MYC, NAMPT, NDRG1, OAS1, PAX3, PCSK1, PHB, PHLDA1, PIM2, PLAUR, PMAIP1, PPARGC1A, PTGS2, RAB27A, SLFN5, SMAD6, SOD2, SP110, STC2, TCF4, TFF3, THBS1, TNFRSF1B, TNFSF10, TWIST1, VCAN, VEGFA, ZFP36                                                                                                                                                                                                                                                                                                                                                                                                           |
| IKKB   |        | kinase                  | Inhibited | -2.431 | 2.88E-06 | ABCA1, AURKB, BCL2, BRCA1, CCL2, CCL20, CCNA2, CCND1, CCR1, CCRN4L, CDC25B, CDC6, CDKN1A, CEBPB, CEBPD, CKS1B, CTSF, CTSK, CXCR4, DUSP6, EGR1, ENPP2, FAS, FASN, FOS, FOXM1, FOXO3, FYN, GRK5, H2AFX, HIF1A, HK2, HMOX1, ICAM1, IL1B, IL8, ITGB3, ITGB5, KIF20A, MBP, MMP9, MT1E, MYC, MYO1D, NFKBIA, OGN, PCDH7, PTEN, PTGS2, RCAN1, SEMA3C, SFRP1, SOCS2, SOD2, TIMP2, TIMP3, TNFRSF1B, TPM2, TRIM63, TWIST1, VCAN, VEGFA                                                                                                                                                                                                                                                                                                                                                                                                                                                                                                                                                                                                                     |
| IL6    |        | cytokine                | Inhibited | -2.908 | 3.21E-06 | ABCA1, ABCC1, ABCC2, ADAMTS1, ADRBK1, AHNAK, AHR, ANG, ANXA1, APOE, ATP2A2, BATF, BAX, BCL2, BCL2L11, BCL3, BDNF, BIRC5, BMI1, CASP1, CCL2, CCL20, CCNA2, CCN2B, CCND1, CCR1, CD36, CD74, CD97, CDC25C, CDC6, CDKN1A, CDKN1B, CEACAM1, CEBPB, CEBPD, CENPA, CES2, CPB2, CTGF, CTSK, CXCR4, DEFBA4/DEFB4B, DUSP1, DUSP6, E2F2, EGR1, ENPP2, EOMES, ETS2, F12, FAS, FLI1, FOS, FOXM1, GLRX, GSTA4, HIF1A, HLA-DRB1, HMOX1, HOMER3, HPGD, ICAM1, ID1, ID2, IFI16, IFIT2, IGFBP3, IGFBP5, IL12A, IL7R, IL8, IRF4, IRF9, ITGB3, ITGB5, JUN, JUND, KDR, KIF11, KIF2C, KIT, KRT18, LARGE, LIF, LPL, MAF, MAP2K1, MCL1, MERTK, MMP9, MRAS, MT1E, MYB, MYC, NAMPT, NFKBIA, OSBP1A, PHB, PLAT, PPP1R15A, PPRC1, PRNP, PROM1, PTGES, PTGS2, SCNN1A, SLC39A14, SMOX, SNX10, SOCS2, SOD2, SP110, SPP1, SRC, SV2B, TBC1D9, TBXAS1, THBS1, TK1, TLR4, TNFRSF1A, TNFRSF1B, TRAP, TTK, TWIST1, UBE2C, VASP, VEGFA, XBP1                                                                                                                                          |
| MAPK9  |        | kinase                  | Inhibited | -2.769 | 3.58E-06 | BAX, BCL2, BCL2L11, BMP1, CAV1, CCL2, CDKN1A, CDKN1B, CEBPB, CHERP, EGR1, FOS, FOSL1, GSTM1, HIF1A, HMGA1, IFI16, IL12A, IL1B, IL8, IRF9, ISG20, JUN, JUND, LGALS3BP, LIF, MARCKSL1, MMP9, MYC, NCL, PLA1A, PLAT, PPP1R15A, PTEN, PTGS2, RILPL1, SOD2, VDR, ZFP36, ZYX                                                                                                                                                                                                                                                                                                                                                                                                                                                                                                                                                                                                                                                                                                                                                                          |
| MAP2K1 | -0.339 | kinase                  | Inhibited | -2.436 | 3.93E-06 | ABCC1, ACTA2, AHR, APOE, BCL2, BCL2L11, BRCA1, CAPN3, CCL2, CCND1, CDKN1A, CDKN1B, CTGF, DAB2, DKK1, DUSP1, DUSP5, DUSP6, EGR2, ETV5, F2R, FASN, FGF2, FOS, FOSL1, FURIN, GUSB, HIF1A, IL8, ITGB3, JUN, JUND, MITF, MMP9, MYC, NFKBIA, PLAUR, PTGS2, RAB38, RAP1GAP, SNAI2, THBS1, TNC, TWIST1, VEGFA                                                                                                                                                                                                                                                                                                                                                                                                                                                                                                                                                                                                                                                                                                                                           |
| ITGB1  |        | transmembrane receptor  | Inhibited | -2.184 | 4.33E-06 | ABCC1, ACTA2, APOE, BCL2, CCL2, CDKN1A, CDKN1B, FGF3, FOS, GAS1, ICAM1, IL1B, IL8, ITGB3, JUN, LAMB1, LAMC1, LIMS1, MMP9, MYC, PTK2, RAC2, TCF4, THBS1, TIMP2, VEGFA                                                                                                                                                                                                                                                                                                                                                                                                                                                                                                                                                                                                                                                                                                                                                                                                                                                                            |
| IL5    |        | cytokine                | Inhibited | -3.038 | 8.75E-06 | ACAA2, ANXA2, ASNS, ATP1B1, ATXN1, BCL2, BCL3, BNIP3, CASP4, CCL2, CCND2, CCR1, CD55, CEACAM1, CKAP4, CXCR4, DDX21, DUSP5, DUSP6, EGLN1, EGR1, EGR2, EGR3, ERO1L, FAM65B, FAS, GCLM, GLI2R2, HBEGF, HIF1A, HMGR, HMHR, HSPA6, ICAM1, IER3, IL8, KIAA1147, KLHD2, MMP9, MYC, NDRG1, NEK2, P4HA1, PDE4B, PMP22, PPIF, PSAT1, RAB21, RAP1GAP, SLC16A3, SLC1A5, SLC2A1, SLC39A8, SLC7A5, SNAP23, SNTB1, SOCS2, SPCS2, SRI, ST7, STK39, TUBB2B, UCK2, UPP1, XBP1, ZYX                                                                                                                                                                                                                                                                                                                                                                                                                                                                                                                                                                                |
| ZBTB17 | 0.295  | transcription regulator | Inhibited | -2.183 | 1.00E-05 | BCL2, BHLHE40, BTG3, CCND1, CDKN1A, DDB2, DDIT3, EGR1, IER3, LRRN3, PMAIP1, ZFP36                                                                                                                                                                                                                                                                                                                                                                                                                                                                                                                                                                                                                                                                                                                                                                                                                                                                                                                                                               |
| IL3    |        | cytokine                | Inhibited | -4.289 | 1.42E-05 | AKR1A1, ARHGEF1, BCL2, BCL2L11, CALR, CCL2, CCND1, CCND2, CD97, CDKN1A, CDKN1B, COPS4, CTLA4, CXCR4, DDIT3, EGR1, EGR2, EGR3, ELK4, F2R, FAS, FASN, FCGR2A, FOS, FOXD3, GART, GNA13, HBEGF, HK1, HK2, HSPA2, ICAM1, IL1B, IL8, ITGB3, JUN, KLF13, KLF9, LIF, LYN, MCL1, MID1, MKI67IP, MT1E, MYC, NCL, NEDD9, NOV, NRP1, PIM2, PPM1G, RALA, RAN, RANBP1, RPL29, RPL6, RPL7, RPS7, SH3BP1, SLC2A1, SLC2A3, SLC3A2, SOX4, SPEN, TK1, TLR4, TNFSF10, TPDS2, VASP, VEGFA, XBP1, YWHAG, ZBTB17, ZFAND5, ZSCAN21                                                                                                                                                                                                                                                                                                                                                                                                                                                                                                                                      |
| PTGS2  | -0.734 | enzyme                  | Inhibited | -2.168 | 1.65E-05 | ANG, ANGP1, ANGP2, ANXA1, ANXA2, BAX, BCL2, BRCA1, CCL2, CCND1, CDK5, CDKN1A, CDKN1B, CDKN2C, CTSK, CXCR4, DUSP1, DYNLL1, EGR1, FOS, ICAM1, IGFBP3, IL12A, IL1B, IL8, ITGA6, KDR, MCL1, MMP9, MYC, NOP2, NR4A2, PPA1, PTGS2, RUNX2, TNFSF10, VEGFA                                                                                                                                                                                                                                                                                                                                                                                                                                                                                                                                                                                                                                                                                                                                                                                              |
| CCL5   |        | cytokine                | Inhibited | -3.077 | 1.95E-05 | AHR, CCL2, CCR1, CD97, DUSP1, DUSP6, F2R, F2RL1, FOS, HMGA1, IL12A, IL1B, IL8, LIMS1, MMP9, NAMPT, PLAUR, PNP, PPIF, PTGS2, SQLE, TLR4, VASP, ZFP36                                                                                                                                                                                                                                                                                                                                                                                                                                                                                                                                                                                                                                                                                                                                                                                                                                                                                             |
| NRIP1  | -0.295 | transcription regulator | Inhibited | -2.36  | 2.45E-05 | ACAA2, ACACA, ACO2, CCN2B, CCND1, CCNG2, CDC6, CDKN1A, FASN, HADHB, HAS2, IL1B, PDK4, PTGS2, RARB, SDHB, SLC16A10, SLC25A19, SLC25A20, SMAD6, SUOX, TK1                                                                                                                                                                                                                                                                                                                                                                                                                                                                                                                                                                                                                                                                                                                                                                                                                                                                                         |
| HRAS   |        | enzyme                  | Inhibited | -2.002 | 3.66E-05 | ADM, ALDH1A3, AMACR, ANXA2, ASNS, ATP2A2, ATXN1, AURKB, B4GALT3, BCL2, BCL2L11, BIRC5, BMP1, BNIP3, CAV1, CCNA2, CCND1, CCND2, CD97, CDC25A, CDKN1A, CDKN1B, CEBPB, CEBPD, CECR5, CFB, COL5A2, CSR2, CTGF, DDIT3, DUSP1, DUSP6, EGR1, ELK3, ETS1, F2R, FABP3, FAM167A, FAS, FGF2, FOS, FOSL1, FRMD6, FSTL1, FSTL3, FURIN, FZD1, FZD2, GNA13, GUSB, HAS2, HIF1A, HMOX1, HSPB1, ICAM1, ID2, IGFBP5, IL13RA1, IL1B, IL8, ITGA4, ITGA6, ITGB5, JUN, KRAS, KRT18, LRR17, LXN, MCAM, MMP9, MRPL12, MSMO1, MYC, NFKBIA, NQP5, NQO1, NRP1, NSFL1C, PAFAH1B3, PDLIM5, PGF, PLAUR, PMAIP1, PRNP, PTEN, PTGS2, RAD9A, RAP1GAP, RARB, RASA3, RNF19B, RTN4, SASH1, SCNN1A, SESN1, SESN3, SOAT1, SORBS1, SOX4, SPP1, SPRY2, SQLE, STK10, TACC3, THBS1, TIMP3, TK1, TOM1, TOX2, TPM2, TSC22D1, TWIST1, UBASH3B, VCAN, VEGFA                                                                                                                                                                                                                                    |
| IL1B   | -0.471 | cytokine                | Inhibited | -3.529 | 3.99E-05 | ABCC2, ACTA2, ADAMTS1, ADM, ANGP1, ANGP4, ANXA1, APOE, ATP2A2, BAX, BCL2, BCL3, BDNF, BMF, C1R, CASP4, CCL2, CCL20, CCL28, CCR1, CCRN4L, CD55, CD74, CDKN1A, CEBPB, CEBPD, CFB, CPB2, CSRN1P1, CTSF, CXCR4, DAB2, DBP, DDIT3, DDIT4, DEFBA4/DEFB4B, DUSP1, DUSP5, E2F2, EFNA1, EGR1, ENPP2, EPAS1, ERRF1, F2RL1, FABP5, FAM129A, FAS, FGF2, FGF3, FOS, FOSL1, FOXO1, FST, GBP1, GDF15, GHR, GUSB, HAS2, HBEGF, HES1, HEXA, HIF1A, HK2, HLA-DRA, HMGA1, HMOX1, HSPB1, ICAM1, ID3, IER3, IGFBP3, IGFBP5, IL12A, IL16, IL1B, IL1RAP, IL8, IRAK1, IRS2, ISG20, ITGB3, ITPKB, JUN, KDR, LAMB3, LIF, LOX, MAP2K6, MARCKSL1, MCL1, MIA, MMP9, MT1E, MT2A, MYC, NAMPT, NFKBIA, NQO1, NR4A2, P2RX7, PAPP, PCDH7, PCSK1, PDE4B, PHLDA1, PIM3, PLAT, PLXDC2, PPARGC1A, PTGS2, PTGS2, PTP4A1, RAC2, RARA, RASA2, RCAN1, RRS1, RUNX2, RXRA, SCLY, SCNN1A, SDC4, SESN1, SLC11A2, SLC20A1, SLC2A1, SOCS2, SOD2, SPP1, TGFBR2, THBS1, TIMP2, TIMP3, TK1, TLR4, TNFRSF1B, TNFSF10, TRAFD1, TSC22D3, TWIST1, UAP1, UBD, VASP, VCAN, VDR, VEGFA, XYLT1, ZFP36, ZYX |
| ELK1   |        | transcription regulator | Inhibited | -2.569 | 6.62E-05 | CDKN1A, CDKN1B, EGR1, EGR2, FOS, FOSL1, JUN, MCL1, MMP9, MYLK, PTGS2, RUNX2, SLC2A1, SPP1, ZFP36                                                                                                                                                                                                                                                                                                                                                                                                                                                                                                                                                                                                                                                                                                                                                                                                                                                                                                                                                |

|          |        |                         |           |        |          |                                                                                                                                                                                                                                                                                                                                                                                                                                                                                                                                                                                   |
|----------|--------|-------------------------|-----------|--------|----------|-----------------------------------------------------------------------------------------------------------------------------------------------------------------------------------------------------------------------------------------------------------------------------------------------------------------------------------------------------------------------------------------------------------------------------------------------------------------------------------------------------------------------------------------------------------------------------------|
| EGR1     | -1.389 | transcription regulator | Inhibited | -2.105 | 8.87E-05 | ATP2A2, BAX, BCL2L11, CACNA1H, CAV1, CCL2, CCND1, CCND2, CCR1, CDK5R1, CDKN1A, DUSP4, EGR1, EGR2, FAS, FGF2, FOSL1, FTL, GDF15, HMGR, HMOX1, ICAM1, IL1B, IL8, JUN, JUND, MMP9, MYB, MYC, NDRG1, PTEN, PTGES, PTGS2, SOD2, SQLE, TGFB2, THBS1, TLR4, TNFSF10, VEGFA                                                                                                                                                                                                                                                                                                               |
| F2R      | -0.373 | G-protein coupled       | Inhibited | -2.825 | 1.00E-04 | ANGPT1, ANGPT2, CCL2, CCND1, CD55, CTGF, DUSP1, EGR1, F2R, FOS, HMOX1, ICAM1, IL1B, IL8, KDR, PTGS2, THBS1, VEGFA                                                                                                                                                                                                                                                                                                                                                                                                                                                                 |
| PDGFB    |        | growth factor           | Inhibited | -3.34  | 1.00E-04 | ACTA2, EGR1, FOS, FOXO1, FOXO3, FOXO4, ICAM1, IL8, KLF2, MMP9, MYC, NOV, PHLDA1, PTEN, PTGS2, SPP1, THBS1, TNC                                                                                                                                                                                                                                                                                                                                                                                                                                                                    |
| CD40LG   |        | cytokine                | Inhibited | -2.831 | 1.21E-04 | AHR, AKAP13, ALG3, BATF3, BAX, BCL2, BNIP3, BTG1, BTG3, CASP1, CCL2, CCL20, CCNG2, CCR1, CDC25B, CDK6, CDKN1A, CDKN1B, CELF2, CLUH, CSDA, CTGF, CXCL13, CXCR4, DECR1, DUSP1, DUSP4, DUSP5, E2F2, EGR1, FAS, FOS, FURIN, GPR183, HIF1A, HK2, ICAM1, ID2, ID3, IFIT2, IL12A, IL13RA1, IL1B, IL1RAP, IL7R, IL8, IRF4, ITGA4, JUN, JUND, MAP2K3, MARCKS, MARCKSL1, MCL1, METAP1, MT1E, MT1G, MT2A, MYC, NAMPT, NFKBIA, NFKBIE, ORCS, PLAUR, PMAIP1, PTGS2, PTPN12, PVR, RAB9A, RASSF2, RGS1, RUNX3, SEMA4D, SLC29A1, SMG7, SOD2, STK4, TGIF1, TNFSF10, TRADD, TRAF5, UBD, VEGFA, ZZZ3 |
| EDN1     |        | cytokine                | Inhibited | -4.167 | 1.56E-04 | ACTA2, ADAM19, ANXA1, ARHGAP11, ATF6, ATP2A2, BAG2, BCL2, CCND1, CDC25A, CDKN1B, CTGF, EDNRB, EGR1, ERFF1, FGF2, FOS, FOSL1, FST, HEY1, HIF1A, ICAM1, IL8, ITGB3, JUN, MAP2K1, MARCKSL1, MBP, MCAM, MIF, MMP9, MSN, MYC, NUPR1, PLAUR, PLCB4, PRKCE, PTGS2, SLC2A1, THBS1, TIMP3, TPM2, VCAN, VEGFA                                                                                                                                                                                                                                                                               |
| PRKCE    | 0.191  | kinase                  | Inhibited | -3.09  | 1.97E-04 | ACTA2, BAX, BCL2, BIRC5, CAV1, CCND1, CD55, CDKN1A, CEBPB, EGR1, FOS, HSP90A1, IL1B, IL8, JUN, MMP9, MYC, PRKCE, PRKD1, PTGS2, VEGFA                                                                                                                                                                                                                                                                                                                                                                                                                                              |
| STAT5A   |        | transcription regulator | Inhibited | -2.112 | 2.48E-04 | ARNT, ATM, BAX, BCL2, CASP4, CCND1, CCND2, CDC25C, CDK6, CDKN1A, CDKN1B, CEBPB, EPAS1, EPOR, FAS, FASN, FCER1G, FOS, GJB1, ICAM1, ID1, ID2, LTBR, MAF, MCL1, MYC, NR4A2, RIMKLA, SLC2A1, SOCS2, TNFRSF1A, UGP2, YWHAG, ZFP36, ZP3                                                                                                                                                                                                                                                                                                                                                 |
| MAPK1    |        | kinase                  | Inhibited | -2.465 | 2.58E-04 | ACO1, APBB3, APOE, ATP1B1, B3GALT4, BCL2, BDNF, BIRC5, C15, CCND1, CDK5R1, CDKN1A, CDKN1B, CFB, CHST2, DAB2, DUSP1, EGR1, EGR2, ENDOD1, EXOC2, FAIM3, FOS, GBP1, GFOD1, GPRB3, HMOX1, IFI16, IFIT2, IGF2BP3, IL1B, IRF9, ISG20, ITGB3, ITPR2, JUN, JUND, L3MBTL1, LAMA4, LGALS3BP, LIF, LZTS2, MBP, MCL1, MMP9, MNS1, NRP1, NTSE, NUPR1, OAS1, OSBP1, PARP12, PDLIM3, PTGS2, QKI, SCNN1A, SOCS2, SP100, SPOCK1, SPP1, SPRY2, SPRY4, SPSB1, STAT2, SUOX, TMEM158, TNFRSF1B, TNFSF10, UBE2C, VDR, WIPF1                                                                             |
| MAPK3    |        | kinase                  | Inhibited | -3.611 | 2.66E-04 | B4GALT5, BCL2L11, CCND1, DUSP4, EGR1, FOS, FOSL1, FURIN, IL8, JUN, MCL1, MMP9, MYC, PLAUR, PPARGC1A, PTGES, PTGS2, SPP1, THBS1                                                                                                                                                                                                                                                                                                                                                                                                                                                    |
| IL15     |        | cytokine                | Inhibited | -3.129 | 3.10E-04 | ACADS, ACTG2, AHR, ANXA1, BCL2, BCL2L11, BTG1, CALM1, CCL2, CCND2, CCR1, CD2, CD55, CD59, CD74, CDK6, CEACAM1, CKS1B, CTGF, CXCR4, DDX18, DHR54, DUSP14, DUSP5, EGR2, ELK3, ETS1, FAS, FYB, FYN, GABPB1, GLDC, GNL2, GPRC5A, HIST2H2AA3/HIST2H2AA4, HNRNP, IL1RAP, IL7R, IL8, ITGB5, JUN, LEF1, LIF, LYN, MAF, MCL1, MICB, MST1, MT1G, MYC, NFKBIA, NUDT1, OGN, PA2G4, PAFAH1B3, PDE4B, PMAIP1, PNP, PTP4A1, PTP4A2, RAC2, RBBP8, SOCS2, SP100, SRSF7, TGFB2, TJP2, TNFRSF1A, TNFSF10, UPP1, VDR, XBP1, YARS, ZFP36                                                               |
| PPRC1    | -0.393 | transcription regulator | Inhibited | -3.622 | 3.50E-04 | CCL20, CLDN1, DDT14, DUSP5, ERFF1, FBXL13, GDF15, HK2, IL8, LAMB3, NAMPT, PHLDA1, PTGS2, RND3, SPRR2D, SUN3, TMEM154                                                                                                                                                                                                                                                                                                                                                                                                                                                              |
| IGF1     |        | growth factor           | Inhibited | -2.106 | 4.24E-04 | ACACA, ACTA2, ADM, ANGPT2, BAX, BCL2, BDNF, BHLHE40, BIRC5, BRCA1, CCNA2, CCND1, CCND2, CDKN1A, CDKN1B, CSDA, CTGF, DDT13, DDT14, DEFB4A/DEFB4B, EFN2, EGR1, EGR2, EPAS1, FASN, FOS, FOXO1, GHR, H2AFX, HIF1A, HMGR, HMOX1, ICAM1, ID2, IER3, IFNGR2, IGFBP3, IGFBP5, IL16, IL1B, IL8, IRS2, ITGB5, JUN, LPL, MAFG, MAK16, MBP, MCL1, MYB, MYC, NFKBIA, NOX4, OSBP1, PHLDA1, PLAUR, PLP1, PTEN, RARB, RUNX2, SLC20A1, SLC2A1, SNAI2, SOX2, SPP1, SQLE, THBS1, TK1, TLR4, TNFRSF12A, TUBB3, TWIST1, VEGFA                                                                          |
| MIF      |        | cytokine                | Inhibited | -2.96  | 4.63E-04 | ACTA2, C3AR1, CCL2, CCND1, CDKN1B, DUSP1, F2R, F2RL1, FASN, FOS, ICAM1, IL1B, IL8, ITIH5, JUN, MMP9, PTGS2, TLR4, TPH2                                                                                                                                                                                                                                                                                                                                                                                                                                                            |
| CREB1    |        | transcription regulator | Inhibited | -2.941 | 6.18E-04 | ABCA1, ADM, ANGPTL2, APOE, BCL2, BDNF, BHLHE40, CCNA2, CCND1, CEBPB, CEPBD, CR2, CSRN1, CSR2, DUSP1, DUSP14, EGR1, EGR2, ERFF1, FASN, FOS, FRMD6, GPR19, HAS2, HLA-DRA, HMGR, HMOX1, ID1, IL1B, IRS2, JUN, LSS, MCL1, MNS1, MSMO1, MVK, MYC, NDUFA10, NR4A2, PCSK1, PDXK, PER2, PIM3, PITPNB, PPARGC1A, PPP1R15A, PTGS2, SLC2A3, SMAD6, SOD2, SRPK2, TFAP2A, TOM1, UPP1, VEGFA, ZFP36                                                                                                                                                                                             |
| HBEGF    | -0.161 | growth factor           | Inhibited | -2.892 | 6.88E-04 | BCL2, CCND1, CCND2, CXCR4, FGF2, HK2, MMP9, NRP1, PDK4, PTGS2, TGFA, VEGFA                                                                                                                                                                                                                                                                                                                                                                                                                                                                                                        |
| GRP      |        | growth factor           | Inhibited | -2.689 | 7.06E-04 | CCND1, CDKN1B, FOS, IL8, JUN, MYC, PTGS2, PTK2, RRM1, VEGFA                                                                                                                                                                                                                                                                                                                                                                                                                                                                                                                       |
| BCL2     | -0.394 | transporter             | Inhibited | -2.464 | 7.15E-04 | ABCC1, ATP2A2, BAX, BCL2, BCL2L11, BNIP3, CCND1, CDKN1A, CDKN1B, CTSH, FAS, FOS, HIF1A, ICAM1, IL1B, IL8, MCAM, MCL1, MMP9, NDRG1, NFKBIA, PLAUR, PTEN, SPHK1, TIMP2, VEGFA                                                                                                                                                                                                                                                                                                                                                                                                       |
| SYVN1    |        | transporter             | Inhibited | -4     | 8.12E-04 | ABCC4, ACSL3, AHR, ATP1B3, BHLHE40, CALM1, CCND1, CSPG4, CTPS1, CYB5B1, DAB2, DUSP1, EPHA2, FASN, GPRC5A, HSPB1, IL7R, ITGA6, KCNN4, LGALS3BP, MCAM, NDFIP2, PPAP2B, PTBP1, SLC1A5, SLC20A1, SLC27A3, SLC2A1, SLC2A3, SLC30A1, SLC39A10, SLC3A2, SLC43A3, SLC4A7, SLC7A5, SNAP23                                                                                                                                                                                                                                                                                                  |
| HMGA1    | -0.234 | transcription regulator | Inhibited | -2.267 | 8.42E-04 | ATM, BCL2, BRCA1, CAV1, CCND1, DAB2, DHCR7, HMGR, ID3, KIT, MIA, MMP9, MVK, PTGS2, TWIST1                                                                                                                                                                                                                                                                                                                                                                                                                                                                                         |
| SRC      | -0.181 | kinase                  | Inhibited | -3.12  | 1.22E-03 | CAV1, CBL, CCL2, CCND1, CCND2, CDKN1A, DUSP1, F2R, FOS, FOSL1, HAS2, HIF1A, HMOX1, ICAM1, ID1, IL8, JUN, KRT18, MCL1, MMP9, MYC, NQO1, PLAUR, PRKCE, PTGS2, SPP1, SRC, VEGFA                                                                                                                                                                                                                                                                                                                                                                                                      |
| DDX17    |        | enzyme                  | Inhibited | -2.176 | 1.67E-03 | CCND1, CDKN1A, FOSL1, JUN, MYC                                                                                                                                                                                                                                                                                                                                                                                                                                                                                                                                                    |
| NGF      |        | growth factor           | Inhibited | -2.78  | 1.97E-03 | ANXA2, BAX, BCL2, BCL2L11, BDNF, CAV1, CCND1, CDK5R1, CDKN1A, CDKN1B, DLG4, DUSP1, DUSP4, E2F2, EGR1, EGR2, EHD4, EPAS1, FAS, FOS, FOSL1, HMOX1, ID1, JUN, MAP3K11, MAP3K12, MMP9, MT1A, MYC, PLAUR, PPP2R2B, PTEN, SGG2, SLC40A1, TFAP2A, TNFRSF12A, TRPV4, VEGFA, VGF                                                                                                                                                                                                                                                                                                           |
| TNFSF13B | -0.432 | cytokine                | Inhibited | -2.861 | 2.04E-03 | BAX, BCL2, BCL2L11, CCND2, CR2, DUSP5, ICAM1, IL8, MCL1, MMP9, MYC, NAMPT, PIM2                                                                                                                                                                                                                                                                                                                                                                                                                                                                                                   |
| SPHK1    | -0.429 | kinase                  | Inhibited | -2.478 | 2.66E-03 | BCL2L11, CCND1, CDKN1A, CTGF, DEFB4A/DEFB4B, EGR1, IL1B, JUN, MAP2K6, PTGES, PTGS2                                                                                                                                                                                                                                                                                                                                                                                                                                                                                                |
| ARNT     | 0.203  | transcription regulator | Inhibited | -3.13  | 3.25E-03 | ADM, AHR, BHLHE40, BHLHE41, BNIP3, CAV1, CCND2, ERO1L, FURIN, GAS1, HIF1A, ID2, IRS2, ITGB3, KIF20A, MACF1, MPP1, NQO1, RANBP1, SLC2A1, UBE2C, VEGFA                                                                                                                                                                                                                                                                                                                                                                                                                              |
| PTK2     | -0.306 | kinase                  | Inhibited | -2.021 | 3.27E-03 | ACTA2, CCND1, CDKN1A, CDKN1B, CSPG4, DSP, FOS, KRT18, MMP9, P4HA1, PRRX1, PTK2, THBS1, TIMP3, TNC                                                                                                                                                                                                                                                                                                                                                                                                                                                                                 |
| PRKCB    |        | kinase                  | Inhibited | -2.761 | 3.27E-03 | BAX, CCND1, CDKN1A, EGR1, FASN, FOS, ICAM1, IRS2, JUN, MMP9, MYC, PPARGC1A, PTGS2, SOD2, TGFB2                                                                                                                                                                                                                                                                                                                                                                                                                                                                                    |
| CHRM1    | 0.171  | G-protein coupled       | Inhibited | -2.412 | 3.76E-03 | CHRM1, EGR1, EGR2, EGR3, FOS, JUN                                                                                                                                                                                                                                                                                                                                                                                                                                                                                                                                                 |
| SMAD3    |        | transcription regulator | Inhibited | -2.454 | 4.01E-03 | ACTA2, BCL2, BCL2L11, CCL2, CCND1, CCND2, CCNG2, CDKN1A, CTGF, DAPK1, DUSP4, EGR1, FOS, FST, FSTL3, GLI2, HAS2, HBEGF, HEY1, HMOX1, ID1, IL1B, ITGB5, JUN, JUND, MMP9, MYC, NOV, RUNX2, SOX2, SPP1, SSTR2, TGFA, THBS1, TIMP3, TNC, TPM2, VDR, VEGFA, ZFP36, ZYX                                                                                                                                                                                                                                                                                                                  |
| IL7      |        | cytokine                | Inhibited | -2.531 | 4.25E-03 | AHR, BAX, BCL2, BCL2L11, CCND2, CD2, CDK6, CDKN1A, CDKN1B, CEACAM1, CXCR4, DUSP5, FAS, GSR, IL7R, KLF2, LEF1, LIF, MAF, MCL1, MYC, PIM2, PMAIP1, RUNX2, SLC2A1, TNFSF10, UPP1, XBP1                                                                                                                                                                                                                                                                                                                                                                                               |
| TCF4     | 0.632  | transcription regulator | Inhibited | -2.397 | 5.21E-03 | BIRC5, CCND1, CDKN1A, DKK1, ID2, JUN, MIA, MIF, MYB, MYC, PSD3, SSTR2, TCF7L2, TYRP1, VCAN                                                                                                                                                                                                                                                                                                                                                                                                                                                                                        |
| E2F3     | -0.184 | transcription regulator | Inhibited | -2.18  | 5.33E-03 | BIRC5, BMI1, CCNA2, CCND1, CDC25A, CDC6, CDC4A, CDKN1A, E2F2, E2F3, FGF2, MCM10, MCM2, MT1G, MYB, MYC, PPP1R13B, RRM1, TK1                                                                                                                                                                                                                                                                                                                                                                                                                                                        |
| MAP3K1   | -0.479 | kinase                  | Inhibited | -2.421 | 5.92E-03 | CCND1, DUSP1, EGR1, FAS, FOS, HMOX1, HSPB1, IL8, JUN, LOXL3, NOV, PLAUR, PRDX1, PTGS2, THBS1, TNC                                                                                                                                                                                                                                                                                                                                                                                                                                                                                 |
| MAX      |        | transcription regulator | Inhibited | -2.393 | 6.07E-03 | BAX, CCND2, CCNG2, CDC25A, CDKN1A, CDKN1B, DDT13, DKC1, E2F2, FTH1, HMGA1, ID1, ID2, JARID2, LRRN3, MYC, NCL, RBBP8, SCPEP1, TXNIP, UBE2C                                                                                                                                                                                                                                                                                                                                                                                                                                         |
| NOTCH1   |        | transcription regulator | Inhibited | -2.133 | 7.18E-03 | ACTA2, ADAM19, ANGPT1, BCL2, CCND1, CCND2, CDKN1A, CDKN1B, CEBPD, CTGF, EFN2, EPHA4, FGF2, FOS, FOSL1, GLI2, HES1, HEY1, HEY2, ICAM1, ID1, IGFBP3, IL8, ITGA6, LEF1, LOX, MCAM, MYC, PTEN, PTGS2, PTGS2, RLBP1, RUNX2, RUNX3, SPP1, TGFB2, TGFB3                                                                                                                                                                                                                                                                                                                                  |
| GRN      |        | growth factor           | Inhibited | -2.201 | 7.55E-03 | ANGPT1, BCL2, CCND1, FZD2, VEGFA                                                                                                                                                                                                                                                                                                                                                                                                                                                                                                                                                  |

|        |        |                         |           |        |          |                                                                                                                                                                                                                                                                                                                                                                                                                                                                                                                                                                                                                                                                |
|--------|--------|-------------------------|-----------|--------|----------|----------------------------------------------------------------------------------------------------------------------------------------------------------------------------------------------------------------------------------------------------------------------------------------------------------------------------------------------------------------------------------------------------------------------------------------------------------------------------------------------------------------------------------------------------------------------------------------------------------------------------------------------------------------|
| CXCL12 |        | cytokine                | Inhibited | -3.021 | 8.25E-03 | ACTA2, BAX, BCL2, BCL3, BMP1, CCL2, CCND1, CD36, CTSK, CXCR4, EGR1, FOS, FYN, GAS2, GSR, HNRNP, ICAM1, IFNAR2, IFNGR2, IL8, ITGB3, JMJ1C, JUN, MAPRE3, MARCKS, MMP9, MYC, PPEF1, PTGS2, ROCK1, RUNX3, SORBS3, TNFRSF1B, TNFSF10                                                                                                                                                                                                                                                                                                                                                                                                                                |
| FOXL2  |        | transcription regulator | Inhibited | -2.001 | 8.79E-03 | CCL20, FOS, FST, ICAM1, IER3, IL12A, LIF, MAFF, NR5A2, PPARGC1A, PPP1R15A, PTGS2, SMAD6, SOD2, SOX4, SPRY1                                                                                                                                                                                                                                                                                                                                                                                                                                                                                                                                                     |
| CSF2RB |        | transmembrane receptor  | Inhibited | -2.219 | 1.05E-02 | BCL2, CCND2, FOS, JUN, MYC, SNAP23                                                                                                                                                                                                                                                                                                                                                                                                                                                                                                                                                                                                                             |
| HDAC5  |        | transcription regulator | Inhibited | -2.646 | 1.11E-02 | CDKN1A, DAPK1, HES1, HK2, HLA-DRA, MAP3K3, MEF2C, MYC, PPARGC1A, PTEN, TNFRSF1A                                                                                                                                                                                                                                                                                                                                                                                                                                                                                                                                                                                |
| MAP3K3 | 0.492  | kinase                  | Inhibited | -2.2   | 1.24E-02 | ADSS1, BCL2, FOS, HAS2, IL8, JUN, SNAI2, TGFBR3                                                                                                                                                                                                                                                                                                                                                                                                                                                                                                                                                                                                                |
| EPHB1  |        | kinase                  | Inhibited | -2.224 | 1.31E-02 | EGR1, EGR2, FOS, JUN, PTGS2                                                                                                                                                                                                                                                                                                                                                                                                                                                                                                                                                                                                                                    |
| RHOA   |        | enzyme                  | Inhibited | -2.491 | 1.34E-02 | ACTA2, BAX, BCL2, CCND1, CDKN1A, CDKN1B, CEBPB, CTGF, FOS, GDF15, ICAM1, IL8, JUN, MMP9, RND3, RUNX2, SNAI2                                                                                                                                                                                                                                                                                                                                                                                                                                                                                                                                                    |
| IL17A  |        | cytokine                | Inhibited | -2.206 | 1.49E-02 | BCL2, CCL2, CCL20, CEBPB, CEBPD, CTGF, CXCL13, CYTH3, DEF84A/DEF84B, DLX1, FAS, FOS, GUSB, HBEGF, HSPB8, ICAM1, IL16, IL1B, IL8, ITPR2, JUN, LOX, MMP9, NRP1, PTGS2, SPSB1, TIMP2, TLR4, VEGFA, YWHAG                                                                                                                                                                                                                                                                                                                                                                                                                                                          |
| CR2    | 0.122  | transmembrane receptor  | Inhibited | -2     | 1.54E-02 | BCL2, CR2, FAS, IL1B                                                                                                                                                                                                                                                                                                                                                                                                                                                                                                                                                                                                                                           |
| DNMT3B |        | enzyme                  | Inhibited | -2.688 | 1.63E-02 | ABCD1, AHCTF1, BATF3, CDC25C, CDKN1A, EMILIN2, EPM2AIP1, HOXB13, IRF5, KDELR3, LONRF1, LXN, MAPRE3, MGST1, MID1, PRUNE2, RPP25, SLC30A1                                                                                                                                                                                                                                                                                                                                                                                                                                                                                                                        |
| MAP2K5 | 0.296  | kinase                  | Inhibited | -2.411 | 1.68E-02 | CCND1, FOS, JUN, KLF2, ME2FA, MMP9, PTGS2                                                                                                                                                                                                                                                                                                                                                                                                                                                                                                                                                                                                                      |
| FGFR1  |        | kinase                  | Inhibited | -2.418 | 1.85E-02 | BIRC5, CCND1, CCND2, CDKN1A, DNAJC1, EIF4G1, EIF5B, FGF2, FGFR3, FOS, HES1, JUN, MYC, PCSK1, PLAUR, PTGS2, PTPRA                                                                                                                                                                                                                                                                                                                                                                                                                                                                                                                                               |
| TGFA   | -1.34  | growth factor           | Inhibited | -2.907 | 1.94E-02 | BIRC5, CASP1, CCL2, CCND1, CDKN1A, CEBPB, CTGF, ERRF1, FOS, GJB1, ICAM1, IL8, MMP9, NR4A2, PLAT, PRNP, PTGS2, TGFA, VEGFA                                                                                                                                                                                                                                                                                                                                                                                                                                                                                                                                      |
| IL1A   |        | cytokine                | Inhibited | -2.467 | 2.07E-02 | ABCC2, ADAMTS1, ADORA2B, ALDH1A3, BCL2, BCL3, CCL2, CCL20, CDKN1A, DEF84A/DEF84B, F2RL1, FAS, FGF2, FOS, FTH1, GBP1, GNB4, HMOX1, ICAM1, IFNGR2, IGFBP5, IL1B, IL8, IRAK1, ITGB3, JUN, KIT, LIF, LOX, MCAM, MMP9, MT2A, MYC, NFKBIA, NR3C1, PTGES, PTGS2, SOD2, SPP1, TK1, UGT2B17                                                                                                                                                                                                                                                                                                                                                                             |
| F3     |        | transmembrane receptor  | Inhibited | -2.611 | 2.22E-02 | ANGPT1, CCL2, CTGF, EGR1, IL1B, IL8, MMP9, VEGFA                                                                                                                                                                                                                                                                                                                                                                                                                                                                                                                                                                                                               |
| CXCR1  |        | G-protein coupled       | Inhibited | -2     | 2.69E-02 | BAX, BCL2, CCND1, IL8                                                                                                                                                                                                                                                                                                                                                                                                                                                                                                                                                                                                                                          |
| RELA   |        | transcription regulator | Inhibited | -3.239 | 2.93E-02 | APOE, BCL2, BCL3, BECN1, BIRC5, CAV1, CCL2, CCL20, CCND1, CDKN1A, CDKN1B, CEBPB, CFB, CR2, CXCR4, DDIT3, DEF84A/DEF84B, DGCR6, DUSP1, EGR1, FAS, FGF2, FOS, GDF15, GLI2, GRK5, HAS2, HES1, HIF1A, HMOX1, ICAM1, IER3, IFNGR2, IL12A, IL1B, IL7R, IL8, IRF4, JUN, KIT, LYN, MIA, MMP9, MYB, MYC, NAMPT, NFKBIA, NFKBIE, PTEN, PTGS2, PTGS2, SDC4, SOD2, STIM1, TWIST1, UBE2H, VASP, VEGFA                                                                                                                                                                                                                                                                       |
| IRS2   | 0.543  | enzyme                  | Inhibited | -2.096 | 2.98E-02 | ACACA, CDKN1B, EGR1, FASN, FOS, HMGCR, LPL, PPARGC1A, SLC2A1, VEGFA                                                                                                                                                                                                                                                                                                                                                                                                                                                                                                                                                                                            |
| LCK    |        | kinase                  | Inhibited | -2.2   | 3.98E-02 | ANXA1, CCNA2, CD2, FOS, JUN, KRT18, SOX2                                                                                                                                                                                                                                                                                                                                                                                                                                                                                                                                                                                                                       |
| PLAUR  | -0.456 | transmembrane receptor  | Inhibited | -2.592 | 4.07E-02 | ANG, CCL2, CCND1, ITGA6, ITGB3, KDR, MMP9, MYC, PLAUR                                                                                                                                                                                                                                                                                                                                                                                                                                                                                                                                                                                                          |
| A2M    |        | transporter             | Inhibited | -3     | 4.07E-02 | ATF6, BCL2, CCND1, DDIT3, EIF2A, FOXO1, MAP3K5, PPP1R15A, XBP1                                                                                                                                                                                                                                                                                                                                                                                                                                                                                                                                                                                                 |
| THPO   |        | cytokine                | Inhibited | -2.241 | 4.37E-02 | AURKB, BAX, BIRC5, CCNA2, CCND1, CCND2, FOS, ITGB3, KDR, MYC                                                                                                                                                                                                                                                                                                                                                                                                                                                                                                                                                                                                   |
| CXCR4  | -0.78  | G-protein coupled       | Inhibited | -2.736 | 4.37E-02 | CCL2, CCND1, CXCR4, EGR1, ID1, ID2, IL8, MYC, RUNX2, TNFSF10                                                                                                                                                                                                                                                                                                                                                                                                                                                                                                                                                                                                   |
| CSF2RA |        | transmembrane receptor  | Inhibited | -2.216 | 4.42E-02 | CCND2, FOS, JUN, MYC, SNAP23                                                                                                                                                                                                                                                                                                                                                                                                                                                                                                                                                                                                                                   |
| TLR4   | -0.247 | transmembrane receptor  | Inhibited | -2.804 | 4.99E-02 | ADM, ADRBK1, ATM, BATF, BCL2, CCL2, CCND2, CD200, CDK6, CEBPD, CFB, CTSK, DAB2, DEF84A/DEF84B, E2F5, HBEGF, HHEX, HMOX1, ICAM1, IFIT2, IL12A, IL1B, IL8, ISG20, LMO4, MERTK, METTL1, MMP9, MYC, NFKBIA, PELI1, PLA1A, PLAT, PTGES, PTGS2, RGS1, RILPL1, RXRA, SLC6A12, SLC03A1, SPP1, ST3GAL1, STAT2, TCF4, TIMELESS, TLR4, TNFSF10, TSC22D1, XBP1                                                                                                                                                                                                                                                                                                             |
| CTNBN1 |        | transcription regulator | Inhibited | -2.799 | 5.10E-02 | ABCC1, ACTA2, ADSS, AHR, AKAP13, ALG3, ANXA1, ARL4A, ATM, BCL2, BIRC5, BMP1, CALM1, CASCA4, CCNA2, CCND1, CCND2, CDKN1A, CEACAM1, CTDSPL, CTGF, DIAPH3, DKK1, EOMES, ETV4, F2R, FAS, FCER1G, FEN1, FOS, FOSL1, FSTL3, FZD7, GHR, GJB1, GLI2, GNA12, HHEX, HMG20B, HOXA5, ID2, ID3, IGFBP5, IL1B, IL8, IRF4, ITGA6, JUN, LAMB1, LEF1, LPL, MAP3K11, MCL1, MITF, MMP16, MMP9, MYC, MYLK, NPTX1, NRCAM, PAX3, PDE4B, PHLDA2, PLAUR, PMP22, POU3F2, PTGS2, RAI14, RCN1, RUNX2, SEC61A1, SEMA3C, SFRP1, SIM2, SLC1A5, SMAD6, SNAI2, SORBS3, SOX2, SOX4, SPP1, STXBP1, SYK, SYNMM, TCF4, TCF7L2, TGFA, TIMP3, TLE4, TMEM2, TNC, TSC22D1, TWIST1, VCAN, VEGFA, ZNF624 |
| MYCN   |        | transcription regulator | Inhibited | -2.051 | 5.22E-02 | ABCC1, ARPC1B, BAX, BID, BIRC5, BMI1, CAV1, CCND1, CCND2, CDKN1A, CDKN1B, CKAP4, COL5A2, CTGF, DKK3, E2F2, E2F5, EIF4A1, FRMD6, HK2, HMGA1, HSP90AB1, HSPD1, ID2, JARID2, LRRN3, MXI1, NCL, NUCB1, OLIG1, PHB, PTK2, RPL29, RPL6, RPL7, RPL9, RPS7, SLC25A19, SLC2A1, SORD, TIMP2, TNFRSF1A, WAC, ZEB2, ZFAND5, ZYX                                                                                                                                                                                                                                                                                                                                            |
| FHL2   |        | transcription regulator | Inhibited | -2     | 8.77E-02 | ACTA2, BCL2L1, CCND1, IL8, MITF, SPP1                                                                                                                                                                                                                                                                                                                                                                                                                                                                                                                                                                                                                          |
| LRP1   |        | transmembrane receptor  | Inhibited | -2.425 | 1.07E-01 | C1R, C1S, DDIT3, MMP9, PLIN2, PTGS2                                                                                                                                                                                                                                                                                                                                                                                                                                                                                                                                                                                                                            |
| C5     |        | cytokine                | Inhibited | -2.128 | 1.13E-01 | BCL2, CCL2, CCND1, EFNB2, EGR1, FCGR2A, GDF15, ICAM1, IFNGR2, IL12A, IL1B, IL8, NFKBIA, PLAT, PPP1R15A, SLC25A15, ST6GAL1, VEGFA, ZFP36                                                                                                                                                                                                                                                                                                                                                                                                                                                                                                                        |
| IKBKE  |        | kinase                  | Inhibited | -2.485 | 1.81E-01 | BCL2, CCND1, CDKN1B, IFIT2, IL8, MMP9, MYC, NFKBIA, PTGS2                                                                                                                                                                                                                                                                                                                                                                                                                                                                                                                                                                                                      |
| GHRL   |        | growth factor           | Inhibited | -2.195 | 2.01E-01 | ACACA, BCL2, BDNF, FASN, FOS, IL1B, LPL, PTGS2, SPP1                                                                                                                                                                                                                                                                                                                                                                                                                                                                                                                                                                                                           |
| TLR7   |        | transmembrane receptor  | Inhibited | -2.06  | 2.14E-01 | BCL2, CCL2, CCL20, CREB5, FAIM3, FAM19A4, FGF2, HIVEP2, ICAM1, IER3, IL1B, IL8, NFKBIA, PLAT, TMEM154                                                                                                                                                                                                                                                                                                                                                                                                                                                                                                                                                          |
| TBK1   |        | kinase                  | Inhibited | -2.288 | 2.35E-01 | ATM, ICAM1, IFIT2, IL12A, IL1B, IL8, ISG20, PLA1A, PTGS2, RILPL1, SLC03A1, TSC22D1, VEGFA                                                                                                                                                                                                                                                                                                                                                                                                                                                                                                                                                                      |
| HSPD1  | -0.238 | enzyme                  | Inhibited | -2.219 | 2.39E-01 | BAX, HSPD1, ICAM1, IL12A, IL1B                                                                                                                                                                                                                                                                                                                                                                                                                                                                                                                                                                                                                                 |
| CARM1  |        | transcription regulator | Inhibited | -2     | 2.39E-01 | EGR3, ICAM1, MYC, PTGES, STC2                                                                                                                                                                                                                                                                                                                                                                                                                                                                                                                                                                                                                                  |
| GDNF   |        | growth factor           | Inhibited | -2.184 | 3.01E-01 | BDNF, CCND1, CDKN1B, EGR1, EGR2, ITGA6, KIT, SPHK1, STC1, TUBB4A, VASP                                                                                                                                                                                                                                                                                                                                                                                                                                                                                                                                                                                         |
| IL6ST  |        | transmembrane receptor  | Inhibited | -2.579 | 3.07E-01 | ATP2A2, CCND1, EGR1, JUN, MYC, PIM2, TNFRSF1A, TNFRSF1B                                                                                                                                                                                                                                                                                                                                                                                                                                                                                                                                                                                                        |
| HDAC6  | 0.174  | transcription regulator | Inhibited | -2     | 3.17E-01 | BIRC5, HIF1A, JUN, MYC, SRSF2, TPH2                                                                                                                                                                                                                                                                                                                                                                                                                                                                                                                                                                                                                            |
| TLR2   |        | transmembrane receptor  | Inhibited | -2.012 | 3.36E-01 | CCL2, CCR1, CEBPB, CEBPD, DEF84A/DEF84B, DUSP1, HLA-DRB1, HMOX1, ICAM1, IL1B, IL8, IRAK1, ITGA4, KLF2, MMP9, PTGS2, TLR4, VDR, XBP1                                                                                                                                                                                                                                                                                                                                                                                                                                                                                                                            |
| IL18   |        | cytokine                | Inhibited | -2.131 | 4.02E-01 | BCL2, CCL2, CCL20, CXCL16, FAS, ICAM1, IL12A, IL1B, IL8, IRF9, JUN, MMP9, PTEN, PTGS2, TGFBR2, TLR4, TXK, VEGFA                                                                                                                                                                                                                                                                                                                                                                                                                                                                                                                                                |
| IL22   |        | cytokine                | Inhibited | -3.095 | 5.01E-01 | ACTA2, BCL2, CCND1, DEF84A/DEF84B, HMOX1, HSPB1, IL1B, IL8, MCL1, MYC                                                                                                                                                                                                                                                                                                                                                                                                                                                                                                                                                                                          |
| TLR5   |        | transmembrane receptor  | Inhibited | -2.2   | 5.07E-01 | CCL20, DEF84A/DEF84B, ICAM1, IL1B, IL8                                                                                                                                                                                                                                                                                                                                                                                                                                                                                                                                                                                                                         |
| DNMT1  |        | enzyme                  | Inhibited | -2.189 | 1.00E+00 | ASIP, BIRC5, CDC25C, CDKN1A, CDKN1B, MT1E                                                                                                                                                                                                                                                                                                                                                                                                                                                                                                                                                                                                                      |
